# Supplementary material for: Are improper kinetic models hampering drug development?
Source: PeerJ. 2014 Oct 28;2:e649. doi: 10.7717/peerj.649 (PMC4217195; doi:10.7717/peerj.649)
Supplement: Supplemental Information 1 [file peerj-02-649-s001.xlsx]

## Sheet: Intro and BIC stats
This workbook models the cellular production of beta amyloid through the over expression of APP, since the actual concentrations of APP are unknown the substrate is actually equated to the amount of plasmid used to increase expression of APP
This workbook is organized such that the tabs represent different substrate levels
For each model all the sheets reference back to the tabs numbered 15 the lowest added substrate concentration
The tabs labeled only with s and the tab called background are associated with the fitting of equation 5 as equation 5 takes into account background APP levels.
The tabs labeled sheet4 were used to generate figure 2
The tabs labeled with ms are associated with the fitting of equation 10
Currently the constants at the top of tab ms15 are the refit constants for equation 10, to view the published values copy and paste the values from F4-K4 into F3-K3
							The BIC was calculated using the following equation (Faraway 2004).
		Equation 5	Equation 10
			fitted values	published values
	rss	13722.3	54567.8	135982
	n	230	208	208
		59.662	262.345	653.762
		1.7757	2.41887	2.81542			Faraway JJ. 2004. Linear Models with R. Chapman & Hall/CRC, Boca Raton, FL.
		408.41	503.126	585.607
	k	17	5	5
		2.36173	2.31806	2.31806
		40.1494	11.5903	11.5903
	BIC	448.56	514.716	597.198
		1 APP interaction			2 APP interactions			3 APP interactions
		Constants	CI 95%		Constants	CI 95%		Constants	CI 95%
	K1	177.75	+/-33.65	K2	225.492	+/-16.94	K3	605.014	+/-26.98
				Hill1	1.7135	+/-0.19	Hill2	2.68601	+/-0.34
	V1	20.0556	+/-59.08	V2	443.68	+/-21.93	V3	0
1 DAPT	Kx1	30.1836	+/-6.02	Kxx1	70.9294	+/-13.94
	Hill1 x	1.0241	+/-0.19	Hill xx	0.9611	+/-0.16
	K1is	29.5164	+/-12.09	K2i	118.406	+/-30.08
	V1is	451.78	+/-50.18	V2i	0
2 DAPT	Kx2	553.645	+/-75.08
	Hill2 x	2.68725	+/-0.98
	K1ii	34.0497	+/-24.40
	V1ii	0

## Sheet: s800 (2)
			K1	Hilli1 x	Hill2 x	K1is	K1ii	V1	Kx1	Kx2	V1is	V1ii	K2	Hill1	Hill2	K3	V2	Hill xx	Kxx1	V2i	K2i
		42.2831	177.759	1.0241	2.68725	29.5164	34.0497	20.0556	30.1836	553.645	451.78	0	225.492	1.7135	2.68601	605.014	443.68	0.9611	70.9294	0	118.406
	S	I	K1	Hilli1 x	Hill2 x	K1is	K1ii	V1	Kx1	Kx2	V1is	V1ii	K2	Hill1	Hill2	K3	V2	Hill xx	Kxx1	V2i	K2i	K2 term	V2 term	V1 term	K1 term	cal	obs
42.2831	842.283	0.01	177.759	1.0241	2.68725	29.5164	34.0497	20.0556	30.1836	553.645	451.78	0	225.492	1.7135	2.68601	605.014	443.68	0.9611	70.9294	0	118.406	225.47	443.591	20.1735	177.719	85.6657	89.641	3.97523
	842.283	0.06	177.759	1.0241	2.68725	29.5164	34.0497	20.0556	30.1836	553.645	451.78	0	225.492	1.7135	2.68601	605.014	443.68	0.9611	70.9294	0	118.406	225.372	443.186	20.7931	177.506	85.5672	89.2396	3.67248
	842.283	0.33	177.759	1.0241	2.68725	29.5164	34.0497	20.0556	30.1836	553.645	451.78	0	225.492	1.7135	2.68601	605.014	443.68	0.9611	70.9294	0	118.406	224.881	441.15	24.2479	176.32	85.0486	86.29	1.24139
	842.283	1	177.759	1.0241	2.68725	29.5164	34.0497	20.0556	30.1836	553.645	451.78	0	225.492	1.7135	2.68601	605.014	443.68	0.9611	70.9294	0	118.406	223.739	436.417	32.8411	173.369	83.8165	85.4167	1.60013
	842.283	3.33	177.759	1.0241	2.68725	29.5164	34.0497	20.0556	30.1836	553.645	451.78	0	225.492	1.7135	2.68601	605.014	443.68	0.9611	70.9294	0	118.406	220.113	421.396	60.9432	163.719	80.0058	78.211	1.79481
	842.283	6.66	177.759	1.0241	2.68725	29.5164	34.0497	20.0556	30.1836	553.645	451.78	0	225.492	1.7135	2.68601	605.014	443.68	0.9611	70.9294	0	118.406	215.496	402.268	95.7914	151.753	75.556	78.7241	3.16804
	842.283	10	177.759	1.0241	2.68725	29.5164	34.0497	20.0556	30.1836	553.645	451.78	0	225.492	1.7135	2.68601	605.014	443.68	0.9611	70.9294	0	118.406	211.35	385.089	125.35	141.601	71.9421	72.1694	0.227228
	842.283	21	177.759	1.0241	2.68725	29.5164	34.0497	20.0556	30.1836	553.645	451.78	0	225.492	1.7135	2.68601	605.014	443.68	0.9611	70.9294	0	118.406	200.124	338.577	196.206	117.251	63.4988	60.9728	2.52601
	842.283	33.3	177.759	1.0241	2.68725	29.5164	34.0497	20.0556	30.1836	553.645	451.78	0	225.492	1.7135	2.68601	605.014	443.68	0.9611	70.9294	0	118.406	190.591	299.077	246.533	99.914	57.1821	57.4736	0.291463
	842.283	45	177.759	1.0241	2.68725	29.5164	34.0497	20.0556	30.1836	553.645	451.78	0	225.492	1.7135	2.68601	605.014	443.68	0.9611	70.9294	0	118.406	183.473	269.589	278.924	88.6935	52.6177	56.0716	3.45385
	842.283	66.6	177.759	1.0241	2.68725	29.5164	34.0497	20.0556	30.1836	553.645	451.78	0	225.492	1.7135	2.68601	605.014	443.68	0.9611	70.9294	0	118.406	173.569	228.552	317.38	75.1591	46.1539	49.3125	3.15862
	842.283	100	177.759	1.0241	2.68725	29.5164	34.0497	20.0556	30.1836	553.645	451.78	0	225.492	1.7135	2.68601	605.014	443.68	0.9611	70.9294	0	118.406	163.19	185.551	349.384	63.176	38.9724	43.8746	4.90222
	842.283	333	177.759	1.0241	2.68725	29.5164	34.0497	20.0556	30.1836	553.645	451.78	0	225.492	1.7135	2.68601	605.014	443.68	0.9611	70.9294	0	118.406	138.161	81.849	325.937	42.1199	18.8734	30.2777	11.4043
	842.283	450	177.759	1.0241	2.68725	29.5164	34.0497	20.0556	30.1836	553.645	451.78	0	225.492	1.7135	2.68601	605.014	443.68	0.9611	70.9294	0	118.406	133.916	64.2607	261.695	39.9332	14.9839	24.08	9.09608
	842.283	666	177.759	1.0241	2.68725	29.5164	34.0497	20.0556	30.1836	553.645	451.78	0	225.492	1.7135	2.68601	605.014	443.68	0.9611	70.9294	0	118.406	129.554	46.1867	153.508	38.3185	10.9503	16.6094	5.65906
	842.283	800	177.759	1.0241	2.68725	29.5164	34.0497	20.0556	30.1836	553.645	451.78	0	225.492	1.7135	2.68601	605.014	443.68	0.9611	70.9294	0	118.406	127.913	39.388	107.924	37.8151	9.4487	19.3098	9.8611
	842.283	1000	177.759	1.0241	2.68725	29.5164	34.0497	20.0556	30.1836	553.645	451.78	0	225.492	1.7135	2.68601	605.014	443.68	0.9611	70.9294	0	118.406	126.211	32.3393	64.9478	37.2826	7.88422	16.3114	8.42718
	842.283	1800	177.759	1.0241	2.68725	29.5164	34.0497	20.0556	30.1836	553.645	451.78	0	225.492	1.7135	2.68601	605.014	443.68	0.9611	70.9294	0	118.406	122.987	18.9788	11.7789	36.0856	4.7892	14.3146	9.52544
	842.283	3333	177.759	1.0241	2.68725	29.5164	34.0497	20.0556	30.1836	553.645	451.78	0	225.492	1.7135	2.68601	605.014	443.68	0.9611	70.9294	0	118.406	120.989	10.7028	0.13867	35.2026	2.74612	7.54598	4.79986
	842.283	6666	177.759	1.0241	2.68725	29.5164	34.0497	20.0556	30.1836	553.645	451.78	0	225.492	1.7135	2.68601	605.014	443.68	0.9611	70.9294	0	118.406	119.749	5.56291	-1.14668	34.6311	1.43713	6.16331	4.72618
	842.283	10000	177.759	1.0241	2.68725	29.5164	34.0497	20.0556	30.1836	553.645	451.78	0	225.492	1.7135	2.68601	605.014	443.68	0.9611	70.9294	0	118.406	119.319	3.78251	-0.94061	34.4359	0.978793	5.56565	4.58686
	842.283	21000	177.759	1.0241	2.68725	29.5164	34.0497	20.0556	30.1836	553.645	451.78	0	225.492	1.7135	2.68601	605.014	443.68	0.9611	70.9294	0	118.406	118.855	1.86203	-0.503516	34.2312	0.482453	2.8286	2.34615
	842.283	33000	177.759	1.0241	2.68725	29.5164	34.0497	20.0556	30.1836	553.645	451.78	0	225.492	1.7135	2.68601	605.014	443.68	0.9611	70.9294	0	118.406	118.698	1.20773	-0.325684	34.1641	0.313009	2.75334	2.44033
	842.283	100000	177.759	1.0241	2.68725	29.5164	34.0497	20.0556	30.1836	553.645	451.78	0	225.492	1.7135	2.68601	605.014	443.68	0.9611	70.9294	0	118.406	118.507	0.41686	-0.10677	34.0865	0.108046	1.39584	1.28779
																												104.172
	842.283	50000	177.759	1.0241	2.68725	29.5164	34.0497	20.0556	30.1836	553.645	451.78	0	225.492	1.7135	2.68601	605.014	443.68	0.9611	70.9294	0	118.406	118.602	0.810819	-0.215366	34.1245	0.21016	0.00114933	0.209011
	842.283	45000	177.759	1.0241	2.68725	29.5164	34.0497	20.0556	30.1836	553.645	451.78	0	225.492	1.7135	2.68601	605.014	443.68	0.9611	70.9294	0	118.406	118.623	0.897051	-0.239354	34.133	0.232508	0.00127724	0.23123
	842.283	40500	177.759	1.0241	2.68725	29.5164	34.0497	20.0556	30.1836	553.645	451.78	0	225.492	1.7135	2.68601	605.014	443.68	0.9611	70.9294	0	118.406	118.646	0.992432	-0.265898	34.1425	0.257225	0.00141877	0.255806
	842.283	36450	177.759	1.0241	2.68725	29.5164	34.0497	20.0556	30.1836	553.645	451.78	0	225.492	1.7135	2.68601	605.014	443.68	0.9611	70.9294	0	118.406	118.671	1.09793	-0.295229	34.153	0.284561	0.00157517	0.282986
	842.283	32805	177.759	1.0241	2.68725	29.5164	34.0497	20.0556	30.1836	553.645	451.78	0	225.492	1.7135	2.68601	605.014	443.68	0.9611	70.9294	0	118.406	118.699	1.21461	-0.327589	34.1648	0.314792	0.00174771	0.313044
	842.283	29524.5	177.759	1.0241	2.68725	29.5164	34.0497	20.0556	30.1836	553.645	451.78	0	225.492	1.7135	2.68601	605.014	443.68	0.9611	70.9294	0	118.406	118.73	1.34366	-0.363219	34.1779	0.348221	0.0019377	0.346283
	842.283	26572	177.759	1.0241	2.68725	29.5164	34.0497	20.0556	30.1836	553.645	451.78	0	225.492	1.7135	2.68601	605.014	443.68	0.9611	70.9294	0	118.406	118.765	1.48637	-0.402358	34.1925	0.385184	0.00214642	0.383038
	842.283	23914.8	177.759	1.0241	2.68725	29.5164	34.0497	20.0556	30.1836	553.645	451.78	0	225.492	1.7135	2.68601	605.014	443.68	0.9611	70.9294	0	118.406	118.803	1.64418	-0.445225	34.2087	0.426051	0.00237505	0.423676
	842.283	21523.4	177.759	1.0241	2.68725	29.5164	34.0497	20.0556	30.1836	553.645	451.78	0	225.492	1.7135	2.68601	605.014	443.68	0.9611	70.9294	0	118.406	118.845	1.81867	-0.492006	34.2267	0.471229	0.00262461	0.468605
	842.283	19371	177.759	1.0241	2.68725	29.5164	34.0497	20.0556	30.1836	553.645	451.78	0	225.492	1.7135	2.68601	605.014	443.68	0.9611	70.9294	0	118.406	118.892	2.0116	-0.542832	34.2468	0.521168	0.00289582	0.518272
	842.283	17433.9	177.759	1.0241	2.68725	29.5164	34.0497	20.0556	30.1836	553.645	451.78	0	225.492	1.7135	2.68601	605.014	443.68	0.9611	70.9294	0	118.406	118.943	2.2249	-0.597743	34.2692	0.57636	0.00318894	0.573171
	842.283	15690.5	177.759	1.0241	2.68725	29.5164	34.0497	20.0556	30.1836	553.645	451.78	0	225.492	1.7135	2.68601	605.014	443.68	0.9611	70.9294	0	118.406	119	2.46068	-0.656651	34.294	0.637351	0.00350355	0.633848
	842.283	14121.5	177.759	1.0241	2.68725	29.5164	34.0497	20.0556	30.1836	553.645	451.78	0	225.492	1.7135	2.68601	605.014	443.68	0.9611	70.9294	0	118.406	119.063	2.7213	-0.719271	34.3217	0.704738	0.0038382	0.7009
	842.283	12709.3	177.759	1.0241	2.68725	29.5164	34.0497	20.0556	30.1836	553.645	451.78	0	225.492	1.7135	2.68601	605.014	443.68	0.9611	70.9294	0	118.406	119.132	3.00933	-0.785049	34.3524	0.779177	0.00419001	0.774987
	842.283	11438.4	177.759	1.0241	2.68725	29.5164	34.0497	20.0556	30.1836	553.645	451.78	0	225.492	1.7135	2.68601	605.014	443.68	0.9611	70.9294	0	118.406	119.209	3.32762	-0.853049	34.3866	0.861389	0.00455408	0.856835
	842.283	10294.6	177.759	1.0241	2.68725	29.5164	34.0497	20.0556	30.1836	553.645	451.78	0	225.492	1.7135	2.68601	605.014	443.68	0.9611	70.9294	0	118.406	119.294	3.6793	-0.921804	34.4247	0.952164	0.00492271	0.947241
	842.283	9265.1	177.759	1.0241	2.68725	29.5164	34.0497	20.0556	30.1836	553.645	451.78	0	225.492	1.7135	2.68601	605.014	443.68	0.9611	70.9294	0	118.406	119.388	4.06779	-0.989121	34.4669	1.05236	0.00528429	1.04708
	842.283	8338.59	177.759	1.0241	2.68725	29.5164	34.0497	20.0556	30.1836	553.645	451.78	0	225.492	1.7135	2.68601	605.014	443.68	0.9611	70.9294	0	118.406	119.491	4.49689	-1.05182	34.5138	1.16294	0.00562195	1.15731
	842.283	7504.73	177.759	1.0241	2.68725	29.5164	34.0497	20.0556	30.1836	553.645	451.78	0	225.492	1.7135	2.68601	605.014	443.68	0.9611	70.9294	0	118.406	119.606	4.97074	-1.10536	34.5658	1.28491	0.00591157	1.27899
	842.283	6754.26	177.759	1.0241	2.68725	29.5164	34.0497	20.0556	30.1836	553.645	451.78	0	225.492	1.7135	2.68601	605.014	443.68	0.9611	70.9294	0	118.406	119.732	5.49389	-1.14342	34.6235	1.4194	0.00611927	1.41328
	842.283	6078.83	177.759	1.0241	2.68725	29.5164	34.0497	20.0556	30.1836	553.645	451.78	0	225.492	1.7135	2.68601	605.014	443.68	0.9611	70.9294	0	118.406	119.871	6.07135	-1.15721	34.6874	1.56762	0.00619799	1.56143
	842.283	5470.95	177.759	1.0241	2.68725	29.5164	34.0497	20.0556	30.1836	553.645	451.78	0	225.492	1.7135	2.68601	605.014	443.68	0.9611	70.9294	0	118.406	120.025	6.70856	-1.13472	34.7582	1.7309	0.00608299	1.72482
	842.283	4923.85	177.759	1.0241	2.68725	29.5164	34.0497	20.0556	30.1836	553.645	451.78	0	225.492	1.7135	2.68601	605.014	443.68	0.9611	70.9294	0	118.406	120.195	7.41153	-1.05955	34.8364	1.91065	0.00568585	1.90496
	842.283	4431.47	177.759	1.0241	2.68725	29.5164	34.0497	20.0556	30.1836	553.645	451.78	0	225.492	1.7135	2.68601	605.014	443.68	0.9611	70.9294	0	118.406	120.382	8.18678	-0.909593	34.9228	2.10838	0.00488662	2.1035
	842.283	3988.32	177.759	1.0241	2.68725	29.5164	34.0497	20.0556	30.1836	553.645	451.78	0	225.492	1.7135	2.68601	605.014	443.68	0.9611	70.9294	0	118.406	120.588	9.04144	-0.655096	35.018	2.32573	0.00352366	2.32221
	842.283	3589.49	177.759	1.0241	2.68725	29.5164	34.0497	20.0556	30.1836	553.645	451.78	0	225.492	1.7135	2.68601	605.014	443.68	0.9611	70.9294	0	118.406	120.816	9.98327	-0.256315	35.1228	2.56441	0.00138044	2.56303
	842.283	3230.54	177.759	1.0241	2.68725	29.5164	34.0497	20.0556	30.1836	553.645	451.78	0	225.492	1.7135	2.68601	605.014	443.68	0.9611	70.9294	0	118.406	121.066	11.0207	0.339565	35.2377	2.82624	-0.00183116	2.82807
	842.283	2907.49	177.759	1.0241	2.68725	29.5164	34.0497	20.0556	30.1836	553.645	451.78	0	225.492	1.7135	2.68601	605.014	443.68	0.9611	70.9294	0	118.406	121.342	12.163	1.20229	35.3636	3.1131	-0.00649148	3.11959
	842.283	2616.74	177.759	1.0241	2.68725	29.5164	34.0497	20.0556	30.1836	553.645	451.78	0	225.492	1.7135	2.68601	605.014	443.68	0.9611	70.9294	0	118.406	121.645	13.4199	2.42333	35.5008	3.42695	-0.013098	3.44004
	842.283	2355.06	177.759	1.0241	2.68725	29.5164	34.0497	20.0556	30.1836	553.645	451.78	0	225.492	1.7135	2.68601	605.014	443.68	0.9611	70.9294	0	118.406	121.979	14.8023	4.12159	35.65	3.76976	-0.0222934	3.79205
	842.283	2119.56	177.759	1.0241	2.68725	29.5164	34.0497	20.0556	30.1836	553.645	451.78	0	225.492	1.7135	2.68601	605.014	443.68	0.9611	70.9294	0	118.406	122.345	16.3217	6.45011	35.8113	4.14354	-0.0348956	4.17844
	842.283	1907.6	177.759	1.0241	2.68725	29.5164	34.0497	20.0556	30.1836	553.645	451.78	0	225.492	1.7135	2.68601	605.014	443.68	0.9611	70.9294	0	118.406	122.748	17.9906	9.60311	35.9848	4.55027	-0.051923	4.60219
	842.283	1716.84	177.759	1.0241	2.68725	29.5164	34.0497	20.0556	30.1836	553.645	451.78	0	225.492	1.7135	2.68601	605.014	443.68	0.9611	70.9294	0	118.406	123.19	19.8221	13.8228	36.1703	4.99191	-0.0746085	5.06652
	842.283	1545.16	177.759	1.0241	2.68725	29.5164	34.0497	20.0556	30.1836	553.645	451.78	0	225.492	1.7135	2.68601	605.014	443.68	0.9611	70.9294	0	118.406	123.675	21.8305	19.4041	36.3672	5.47041	-0.104384	5.5748
	842.283	1390.64	177.759	1.0241	2.68725	29.5164	34.0497	20.0556	30.1836	553.645	451.78	0	225.492	1.7135	2.68601	605.014	443.68	0.9611	70.9294	0	118.406	124.206	24.0309	26.6946	36.5747	5.98774	-0.142819	6.13056
	842.283	1251.58	177.759	1.0241	2.68725	29.5164	34.0497	20.0556	30.1836	553.645	451.78	0	225.492	1.7135	2.68601	605.014	443.68	0.9611	70.9294	0	118.406	124.787	26.4392	36.0857	36.7918	6.54604	-0.191476	6.73752
	842.283	1126.42	177.759	1.0241	2.68725	29.5164	34.0497	20.0556	30.1836	553.645	451.78	0	225.492	1.7135	2.68601	605.014	443.68	0.9611	70.9294	0	118.406	125.423	29.0721	47.9894	37.0176	7.14784	-0.251678	7.39952
	842.283	1013.78	177.759	1.0241	2.68725	29.5164	34.0497	20.0556	30.1836	553.645	451.78	0	225.492	1.7135	2.68601	605.014	443.68	0.9611	70.9294	0	118.406	126.117	31.9472	62.7948	37.2516	7.79635	-0.324161	8.12052
	842.283	912.4	177.759	1.0241	2.68725	29.5164	34.0497	20.0556	30.1836	553.645	451.78	0	225.492	1.7135	2.68601	605.014	443.68	0.9611	70.9294	0	118.406	126.873	35.0825	80.8017	37.4946	8.49584	-0.408689	8.90452
	842.283	821.16	177.759	1.0241	2.68725	29.5164	34.0497	20.0556	30.1836	553.645	451.78	0	225.492	1.7135	2.68601	605.014	443.68	0.9611	70.9294	0	118.406	127.698	38.4967	102.134	37.7495	9.25186	-0.50374	9.7556
	842.283	739.044	177.759	1.0241	2.68725	29.5164	34.0497	20.0556	30.1836	553.645	451.78	0	225.492	1.7135	2.68601	605.014	443.68	0.9611	70.9294	0	118.406	128.593	42.2089	126.647	38.0222	10.0713	-0.606471	10.6777
	842.283	665.14	177.759	1.0241	2.68725	29.5164	34.0497	20.0556	30.1836	553.645	451.78	0	225.492	1.7135	2.68601	605.014	443.68	0.9611	70.9294	0	118.406	129.566	46.2382	153.855	38.3224	10.9617	-0.713166	11.6749
	842.283	598.626	177.759	1.0241	2.68725	29.5164	34.0497	20.0556	30.1836	553.645	451.78	0	225.492	1.7135	2.68601	605.014	443.68	0.9611	70.9294	0	118.406	130.62	50.6036	182.92	38.6638	11.9305	-0.820208	12.7507
	842.283	538.763	177.759	1.0241	2.68725	29.5164	34.0497	20.0556	30.1836	553.645	451.78	0	225.492	1.7135	2.68601	605.014	443.68	0.9611	70.9294	0	118.406	131.759	55.3238	212.713	39.0632	12.9834	-0.925323	13.9087
	842.283	484.887	177.759	1.0241	2.68725	29.5164	34.0497	20.0556	30.1836	553.645	451.78	0	225.492	1.7135	2.68601	605.014	443.68	0.9611	70.9294	0	118.406	132.988	60.4167	241.965	39.5392	14.1233	-1.02859	15.1519
	842.283	436.398	177.759	1.0241	2.68725	29.5164	34.0497	20.0556	30.1836	553.645	451.78	0	225.492	1.7135	2.68601	605.014	443.68	0.9611	70.9294	0	118.406	134.311	65.8988	269.458	40.1105	15.3502	-1.13269	16.4829
	842.283	392.758	177.759	1.0241	2.68725	29.5164	34.0497	20.0556	30.1836	553.645	451.78	0	225.492	1.7135	2.68601	605.014	443.68	0.9611	70.9294	0	118.406	135.732	71.7852	294.194	40.7936	16.6612	-1.24237	17.9036
	842.283	353.483	177.759	1.0241	2.68725	29.5164	34.0497	20.0556	30.1836	553.645	451.78	0	225.492	1.7135	2.68601	605.014	443.68	0.9611	70.9294	0	118.406	137.253	78.0887	315.51	41.6022	18.052	-1.36323	19.4152
	842.283	318.134	177.759	1.0241	2.68725	29.5164	34.0497	20.0556	30.1836	553.645	451.78	0	225.492	1.7135	2.68601	605.014	443.68	0.9611	70.9294	0	118.406	138.878	84.8194	333.094	42.5464	19.5175	-1.50061	21.0181
	842.283	286.321	177.759	1.0241	2.68725	29.5164	34.0497	20.0556	30.1836	553.645	451.78	0	225.492	1.7135	2.68601	605.014	443.68	0.9611	70.9294	0	118.406	140.607	91.9844	346.943	43.6339	21.0527	-1.65877	22.7115
	842.283	257.689	177.759	1.0241	2.68725	29.5164	34.0497	20.0556	30.1836	553.645	451.78	0	225.492	1.7135	2.68601	605.014	443.68	0.9611	70.9294	0	118.406	142.442	99.5866	357.272	44.8699	22.6528	-1.84068	24.4935
	842.283	231.92	177.759	1.0241	2.68725	29.5164	34.0497	20.0556	30.1836	553.645	451.78	0	225.492	1.7135	2.68601	605.014	443.68	0.9611	70.9294	0	118.406	144.382	107.625	364.426	46.2584	24.3132	-2.04804	26.3612
	842.283	208.728	177.759	1.0241	2.68725	29.5164	34.0497	20.0556	30.1836	553.645	451.78	0	225.492	1.7135	2.68601	605.014	443.68	0.9611	70.9294	0	118.406	146.426	116.093	368.8	47.803	26.0286	-2.28156	28.3102
	842.283	187.855	177.759	1.0241	2.68725	29.5164	34.0497	20.0556	30.1836	553.645	451.78	0	225.492	1.7135	2.68601	605.014	443.68	0.9611	70.9294	0	118.406	148.571	124.98	370.787	49.5067	27.7935	-2.54125	30.3347
	842.283	169.07	177.759	1.0241	2.68725	29.5164	34.0497	20.0556	30.1836	553.645	451.78	0	225.492	1.7135	2.68601	605.014	443.68	0.9611	70.9294	0	118.406	150.813	134.268	370.746	51.3726	29.6012	-2.82655	32.4277
	842.283	152.163	177.759	1.0241	2.68725	29.5164	34.0497	20.0556	30.1836	553.645	451.78	0	225.492	1.7135	2.68601	605.014	443.68	0.9611	70.9294	0	118.406	153.146	143.934	368.988	53.4037	31.4444	-3.13644	34.5809
	842.283	136.946	177.759	1.0241	2.68725	29.5164	34.0497	20.0556	30.1836	553.645	451.78	0	225.492	1.7135	2.68601	605.014	443.68	0.9611	70.9294	0	118.406	155.563	153.951	365.771	55.6025	33.315	-3.46945	36.7845
	842.283	123.252	177.759	1.0241	2.68725	29.5164	34.0497	20.0556	30.1836	553.645	451.78	0	225.492	1.7135	2.68601	605.014	443.68	0.9611	70.9294	0	118.406	158.057	164.282	361.306	57.971	35.2042	-3.8236	39.0278
	842.283	110.927	177.759	1.0241	2.68725	29.5164	34.0497	20.0556	30.1836	553.645	451.78	0	225.492	1.7135	2.68601	605.014	443.68	0.9611	70.9294	0	118.406	160.617	174.888	355.762	60.5103	37.103	-4.19631	41.2993
	842.283	99.8339	177.759	1.0241	2.68725	29.5164	34.0497	20.0556	30.1836	553.645	451.78	0	225.492	1.7135	2.68601	605.014	443.68	0.9611	70.9294	0	118.406	163.232	185.724	349.275	63.22	39.0023	-4.58432	43.5866
	842.283	89.8505	177.759	1.0241	2.68725	29.5164	34.0497	20.0556	30.1836	553.645	451.78	0	225.492	1.7135	2.68601	605.014	443.68	0.9611	70.9294	0	118.406	165.891	196.74	341.957	66.0985	40.8933	-4.98366	45.8769
	842.283	80.8655	177.759	1.0241	2.68725	29.5164	34.0497	20.0556	30.1836	553.645	451.78	0	225.492	1.7135	2.68601	605.014	443.68	0.9611	70.9294	0	118.406	168.58	207.882	333.899	69.142	42.7678	-5.38964	48.1574
	842.283	72.7789	177.759	1.0241	2.68725	29.5164	34.0497	20.0556	30.1836	553.645	451.78	0	225.492	1.7135	2.68601	605.014	443.68	0.9611	70.9294	0	118.406	171.287	219.096	325.181	72.3446	44.6185	-5.79682	50.4153
	842.283	65.501	177.759	1.0241	2.68725	29.5164	34.0497	20.0556	30.1836	553.645	451.78	0	225.492	1.7135	2.68601	605.014	443.68	0.9611	70.9294	0	118.406	173.996	230.323	315.874	75.6983	46.4392	-6.19917	52.6383
	842.283	58.9509	177.759	1.0241	2.68725	29.5164	34.0497	20.0556	30.1836	553.645	451.78	0	225.492	1.7135	2.68601	605.014	443.68	0.9611	70.9294	0	118.406	176.696	241.508	306.045	79.1926	48.2247	-6.59016	54.8149
	842.283	53.0558	177.759	1.0241	2.68725	29.5164	34.0497	20.0556	30.1836	553.645	451.78	0	225.492	1.7135	2.68601	605.014	443.68	0.9611	70.9294	0	118.406	179.371	252.592	295.759	82.8144	49.9714	-6.96298	56.9344
	842.283	47.7502	177.759	1.0241	2.68725	29.5164	34.0497	20.0556	30.1836	553.645	451.78	0	225.492	1.7135	2.68601	605.014	443.68	0.9611	70.9294	0	118.406	182.009	263.522	285.082	86.5484	51.6765	-7.31077	58.9873
	842.283	42.9752	177.759	1.0241	2.68725	29.5164	34.0497	20.0556	30.1836	553.645	451.78	0	225.492	1.7135	2.68601	605.014	443.68	0.9611	70.9294	0	118.406	184.598	274.247	274.082	90.3769	53.3387	-7.62689	60.9656
	842.283	38.6777	177.759	1.0241	2.68725	29.5164	34.0497	20.0556	30.1836	553.645	451.78	0	225.492	1.7135	2.68601	605.014	443.68	0.9611	70.9294	0	118.406	187.125	284.718	262.826	94.2804	54.9572	-7.9052	62.8624
	842.283	34.8099	177.759	1.0241	2.68725	29.5164	34.0497	20.0556	30.1836	553.645	451.78	0	225.492	1.7135	2.68601	605.014	443.68	0.9611	70.9294	0	118.406	189.581	294.892	251.386	98.2377	56.5322	-8.14034	64.6725
	842.283	31.3289	177.759	1.0241	2.68725	29.5164	34.0497	20.0556	30.1836	553.645	451.78	0	225.492	1.7135	2.68601	605.014	443.68	0.9611	70.9294	0	118.406	191.956	304.734	239.833	102.226	58.0641	-8.32796	66.392
	842.283	28.196	177.759	1.0241	2.68725	29.5164	34.0497	20.0556	30.1836	553.645	451.78	0	225.492	1.7135	2.68601	605.014	443.68	0.9611	70.9294	0	118.406	194.243	314.21	228.24	106.224	59.5536	-8.46492	68.0185
	842.283	25.3764	177.759	1.0241	2.68725	29.5164	34.0497	20.0556	30.1836	553.645	451.78	0	225.492	1.7135	2.68601	605.014	443.68	0.9611	70.9294	0	118.406	196.436	323.296	216.679	110.206	61.0014	-8.54942	69.5508
	842.283	22.8388	177.759	1.0241	2.68725	29.5164	34.0497	20.0556	30.1836	553.645	451.78	0	225.492	1.7135	2.68601	605.014	443.68	0.9611	70.9294	0	118.406	198.53	331.97	205.219	114.15	62.4079	-8.58107	70.9889
	842.283	20.5549	177.759	1.0241	2.68725	29.5164	34.0497	20.0556	30.1836	553.645	451.78	0	225.492	1.7135	2.68601	605.014	443.68	0.9611	70.9294	0	118.406	200.521	340.219	193.926	118.035	63.7731	-8.56083	72.3339
	842.283	18.4994	177.759	1.0241	2.68725	29.5164	34.0497	20.0556	30.1836	553.645	451.78	0	225.492	1.7135	2.68601	605.014	443.68	0.9611	70.9294	0	118.406	202.407	348.035	182.863	121.839	65.0967	-8.49095	73.5877
	842.283	16.6495	177.759	1.0241	2.68725	29.5164	34.0497	20.0556	30.1836	553.645	451.78	0	225.492	1.7135	2.68601	605.014	443.68	0.9611	70.9294	0	118.406	204.188	355.414	172.085	125.544	66.3781	-8.37481	74.7529
	842.283	14.9845	177.759	1.0241	2.68725	29.5164	34.0497	20.0556	30.1836	553.645	451.78	0	225.492	1.7135	2.68601	605.014	443.68	0.9611	70.9294	0	118.406	205.863	362.356	161.642	129.133	67.6162	-8.21671	75.8329
	842.283	13.4861	177.759	1.0241	2.68725	29.5164	34.0497	20.0556	30.1836	553.645	451.78	0	225.492	1.7135	2.68601	605.014	443.68	0.9611	70.9294	0	118.406	207.435	368.867	151.578	132.591	68.8097	-8.02166	76.8313
	842.283	12.1375	177.759	1.0241	2.68725	29.5164	34.0497	20.0556	30.1836	553.645	451.78	0	225.492	1.7135	2.68601	605.014	443.68	0.9611	70.9294	0	118.406	208.905	374.956	141.927	135.907	69.9572	-7.7951	77.7523
	842.283	10.9237	177.759	1.0241	2.68725	29.5164	34.0497	20.0556	30.1836	553.645	451.78	0	225.492	1.7135	2.68601	605.014	443.68	0.9611	70.9294	0	118.406	210.275	380.634	132.717	139.07	71.0572	-7.54272	78.5999
	842.283	9.83135	177.759	1.0241	2.68725	29.5164	34.0497	20.0556	30.1836	553.645	451.78	0	225.492	1.7135	2.68601	605.014	443.68	0.9611	70.9294	0	118.406	211.55	385.915	123.97	142.075	72.1085	-7.27021	79.3787
	842.283	8.84822	177.759	1.0241	2.68725	29.5164	34.0497	20.0556	30.1836	553.645	451.78	0	225.492	1.7135	2.68601	605.014	443.68	0.9611	70.9294	0	118.406	212.732	390.815	115.698	144.916	73.1099	-6.98307	80.093
	842.283	7.9634	177.759	1.0241	2.68725	29.5164	34.0497	20.0556	30.1836	553.645	451.78	0	225.492	1.7135	2.68601	605.014	443.68	0.9611	70.9294	0	118.406	213.827	395.352	107.907	147.592	74.0606	-6.68649	80.747
	842.283	7.16706	177.759	1.0241	2.68725	29.5164	34.0497	20.0556	30.1836	553.645	451.78	0	225.492	1.7135	2.68601	605.014	443.68	0.9611	70.9294	0	118.406	214.839	399.543	100.599	150.102	74.96	-6.38519	81.3452
	842.283	6.45035	177.759	1.0241	2.68725	29.5164	34.0497	20.0556	30.1836	553.645	451.78	0	225.492	1.7135	2.68601	605.014	443.68	0.9611	70.9294	0	118.406	215.772	403.407	93.7677	152.448	75.8081	-6.08339	81.8915
	842.283	5.80532	177.759	1.0241	2.68725	29.5164	34.0497	20.0556	30.1836	553.645	451.78	0	225.492	1.7135	2.68601	605.014	443.68	0.9611	70.9294	0	118.406	216.63	406.965	87.4049	154.633	76.6051	-5.78475	82.3899
	842.283	5.22478	177.759	1.0241	2.68725	29.5164	34.0497	20.0556	30.1836	553.645	451.78	0	225.492	1.7135	2.68601	605.014	443.68	0.9611	70.9294	0	118.406	217.419	410.234	81.497	156.661	77.3518	-5.49235	82.8442
	842.283	4.70231	177.759	1.0241	2.68725	29.5164	34.0497	20.0556	30.1836	553.645	451.78	0	225.492	1.7135	2.68601	605.014	443.68	0.9611	70.9294	0	118.406	218.143	413.234	76.0277	158.54	78.0491	-5.2087	83.2578
	842.283	4.23207	177.759	1.0241	2.68725	29.5164	34.0497	20.0556	30.1836	553.645	451.78	0	225.492	1.7135	2.68601	605.014	443.68	0.9611	70.9294	0	118.406	218.807	415.983	70.9782	160.273	78.6984	-4.93579	83.6342
	842.283	3.80887	177.759	1.0241	2.68725	29.5164	34.0497	20.0556	30.1836	553.645	451.78	0	225.492	1.7135	2.68601	605.014	443.68	0.9611	70.9294	0	118.406	219.414	418.499	66.3281	161.87	79.3013	-4.6751	83.9764
	842.283	3.42798	177.759	1.0241	2.68725	29.5164	34.0497	20.0556	30.1836	553.645	451.78	0	225.492	1.7135	2.68601	605.014	443.68	0.9611	70.9294	0	118.406	219.969	420.799	62.0558	163.337	79.8597	-4.42771	84.2874
	842.283	3.08518	177.759	1.0241	2.68725	29.5164	34.0497	20.0556	30.1836	553.645	451.78	0	225.492	1.7135	2.68601	605.014	443.68	0.9611	70.9294	0	118.406	220.476	422.899	58.139	164.682	80.3755	-4.19427	84.5698
	842.283	2.77666	177.759	1.0241	2.68725	29.5164	34.0497	20.0556	30.1836	553.645	451.78	0	225.492	1.7135	2.68601	605.014	443.68	0.9611	70.9294	0	118.406	220.939	424.815	54.555	165.913	80.851	-3.97513	84.8261
	842.283	2.499	177.759	1.0241	2.68725	29.5164	34.0497	20.0556	30.1836	553.645	451.78	0	225.492	1.7135	2.68601	605.014	443.68	0.9611	70.9294	0	118.406	221.36	426.562	51.2816	167.037	81.2883	-3.77035	85.0586
	842.283	2.2491	177.759	1.0241	2.68725	29.5164	34.0497	20.0556	30.1836	553.645	451.78	0	225.492	1.7135	2.68601	605.014	443.68	0.9611	70.9294	0	118.406	221.744	428.153	48.2967	168.062	81.6898	-3.57979	85.2696
	842.283	2.02419	177.759	1.0241	2.68725	29.5164	34.0497	20.0556	30.1836	553.645	451.78	0	225.492	1.7135	2.68601	605.014	443.68	0.9611	70.9294	0	118.406	222.094	429.601	45.579	168.995	82.0577	-3.40311	85.4608
	842.283	1.82177	177.759	1.0241	2.68725	29.5164	34.0497	20.0556	30.1836	553.645	451.78	0	225.492	1.7135	2.68601	605.014	443.68	0.9611	70.9294	0	118.406	222.411	430.917	43.1078	169.844	82.3942	-3.23983	85.634
	842.283	1.63959	177.759	1.0241	2.68725	29.5164	34.0497	20.0556	30.1836	553.645	451.78	0	225.492	1.7135	2.68601	605.014	443.68	0.9611	70.9294	0	118.406	222.7	432.115	40.8636	170.614	82.7017	-3.08939	85.791
	842.283	1.47563	177.759	1.0241	2.68725	29.5164	34.0497	20.0556	30.1836	553.645	451.78	0	225.492	1.7135	2.68601	605.014	443.68	0.9611	70.9294	0	118.406	222.963	433.202	38.8279	171.313	82.9821	-2.95114	85.9332
	842.283	1.32807	177.759	1.0241	2.68725	29.5164	34.0497	20.0556	30.1836	553.645	451.78	0	225.492	1.7135	2.68601	605.014	443.68	0.9611	70.9294	0	118.406	223.201	434.189	36.9831	171.947	83.2376	-2.82441	86.062
	842.283	1.19526	177.759	1.0241	2.68725	29.5164	34.0497	20.0556	30.1836	553.645	451.78	0	225.492	1.7135	2.68601	605.014	443.68	0.9611	70.9294	0	118.406	223.417	435.086	35.3129	172.52	83.4701	-2.70847	86.1786
	842.283	1.07574	177.759	1.0241	2.68725	29.5164	34.0497	20.0556	30.1836	553.645	451.78	0	225.492	1.7135	2.68601	605.014	443.68	0.9611	70.9294	0	118.406	223.614	435.899	33.8021	173.039	83.6815	-2.60262	86.2842
	842.283	0.968163	177.759	1.0241	2.68725	29.5164	34.0497	20.0556	30.1836	553.645	451.78	0	225.492	1.7135	2.68601	605.014	443.68	0.9611	70.9294	0	118.406	223.792	436.636	32.4364	173.508	83.8735	-2.50614	86.3797
	842.283	0.871347	177.759	1.0241	2.68725	29.5164	34.0497	20.0556	30.1836	553.645	451.78	0	225.492	1.7135	2.68601	605.014	443.68	0.9611	70.9294	0	118.406	223.953	437.305	31.2027	173.932	84.0478	-2.41834	86.4661
	842.283	0.784212	177.759	1.0241	2.68725	29.5164	34.0497	20.0556	30.1836	553.645	451.78	0	225.492	1.7135	2.68601	605.014	443.68	0.9611	70.9294	0	118.406	224.099	437.911	30.0891	174.314	84.2058	-2.33855	86.5443
	842.283	0.705791	177.759	1.0241	2.68725	29.5164	34.0497	20.0556	30.1836	553.645	451.78	0	225.492	1.7135	2.68601	605.014	443.68	0.9611	70.9294	0	118.406	224.232	438.46	29.0843	174.659	84.349	-2.26613	86.6151
	842.283	0.635212	177.759	1.0241	2.68725	29.5164	34.0497	20.0556	30.1836	553.645	451.78	0	225.492	1.7135	2.68601	605.014	443.68	0.9611	70.9294	0	118.406	224.352	438.957	28.1782	174.97	84.4786	-2.20047	86.6791
	842.283	0.571691	177.759	1.0241	2.68725	29.5164	34.0497	20.0556	30.1836	553.645	451.78	0	225.492	1.7135	2.68601	605.014	443.68	0.9611	70.9294	0	118.406	224.46	439.408	27.3615	175.251	84.596	-2.141	86.737
	842.283	0.514522	177.759	1.0241	2.68725	29.5164	34.0497	20.0556	30.1836	553.645	451.78	0	225.492	1.7135	2.68601	605.014	443.68	0.9611	70.9294	0	118.406	224.559	439.815	26.6256	175.503	84.7022	-2.08719	86.7894
	842.283	0.463069	177.759	1.0241	2.68725	29.5164	34.0497	20.0556	30.1836	553.645	451.78	0	225.492	1.7135	2.68601	605.014	443.68	0.9611	70.9294	0	118.406	224.648	440.185	25.9628	175.731	84.7982	-2.03853	86.8367
	842.283	0.416762	177.759	1.0241	2.68725	29.5164	34.0497	20.0556	30.1836	553.645	451.78	0	225.492	1.7135	2.68601	605.014	443.68	0.9611	70.9294	0	118.406	224.729	440.519	25.366	175.936	84.885	-1.99457	86.8795
	842.283	0.375086	177.759	1.0241	2.68725	29.5164	34.0497	20.0556	30.1836	553.645	451.78	0	225.492	1.7135	2.68601	605.014	443.68	0.9611	70.9294	0	118.406	224.802	440.821	24.8289	176.12	84.9634	-1.95487	86.9183
	842.283	0.337578	177.759	1.0241	2.68725	29.5164	34.0497	20.0556	30.1836	553.645	451.78	0	225.492	1.7135	2.68601	605.014	443.68	0.9611	70.9294	0	118.406	224.868	441.095	24.3455	176.286	85.0342	-1.91905	86.9533
	842.283	0.30382	177.759	1.0241	2.68725	29.5164	34.0497	20.0556	30.1836	553.645	451.78	0	225.492	1.7135	2.68601	605.014	443.68	0.9611	70.9294	0	118.406	224.928	441.343	23.9106	176.436	85.0982	-1.88674	86.9849
	842.283	0.273438	177.759	1.0241	2.68725	29.5164	34.0497	20.0556	30.1836	553.645	451.78	0	225.492	1.7135	2.68601	605.014	443.68	0.9611	70.9294	0	118.406	224.982	441.567	23.5195	176.57	85.1559	-1.85761	87.0135
	842.283	0.246094	177.759	1.0241	2.68725	29.5164	34.0497	20.0556	30.1836	553.645	451.78	0	225.492	1.7135	2.68601	605.014	443.68	0.9611	70.9294	0	118.406	225.03	441.769	23.1678	176.691	85.208	-1.83137	87.0394
	842.283	0.221485	177.759	1.0241	2.68725	29.5164	34.0497	20.0556	30.1836	553.645	451.78	0	225.492	1.7135	2.68601	605.014	443.68	0.9611	70.9294	0	118.406	225.075	441.952	22.8515	176.799	85.2551	-1.80772	87.0628
	842.283	0.199336	177.759	1.0241	2.68725	29.5164	34.0497	20.0556	30.1836	553.645	451.78	0	225.492	1.7135	2.68601	605.014	443.68	0.9611	70.9294	0	118.406	225.115	442.118	22.5672	176.897	85.2975	-1.78643	87.0839
	842.283	0.179403	177.759	1.0241	2.68725	29.5164	34.0497	20.0556	30.1836	553.645	451.78	0	225.492	1.7135	2.68601	605.014	443.68	0.9611	70.9294	0	118.406	225.151	442.268	22.3117	176.985	85.3358	-1.76726	87.1031
	842.283	0.161462	177.759	1.0241	2.68725	29.5164	34.0497	20.0556	30.1836	553.645	451.78	0	225.492	1.7135	2.68601	605.014	443.68	0.9611	70.9294	0	118.406	225.184	442.404	22.082	177.063	85.3703	-1.75001	87.1203
	842.283	0.145316	177.759	1.0241	2.68725	29.5164	34.0497	20.0556	30.1836	553.645	451.78	0	225.492	1.7135	2.68601	605.014	443.68	0.9611	70.9294	0	118.406	225.213	442.526	21.8756	177.134	85.4015	-1.73449	87.136
	842.283	0.130784	177.759	1.0241	2.68725	29.5164	34.0497	20.0556	30.1836	553.645	451.78	0	225.492	1.7135	2.68601	605.014	443.68	0.9611	70.9294	0	118.406	225.24	442.637	21.6902	177.198	85.4295	-1.72053	87.1501
	842.283	0.117706	177.759	1.0241	2.68725	29.5164	34.0497	20.0556	30.1836	553.645	451.78	0	225.492	1.7135	2.68601	605.014	443.68	0.9611	70.9294	0	118.406	225.264	442.737	21.5235	177.255	85.4549	-1.70797	87.1628

## Sheet: s600 (2)
			K1	Hilli1 x	Hill2 x	K1is	K1ii	V1	Kx1	Kx2	V1is	V1ii	K2	Hill1	Hill2	K3	V2	Hill xx	Kxx1	V2i	K2i
		42.2831	177.759	1.0241	2.68725	29.5164	34.0497	20.0556	30.1836	553.645	451.78	0	225.492	1.7135	2.68601	605.014	443.68	0.9611	70.9294	0	118.406
	S	I	K1	Hilli1 x	Hill2 x	K1is	K1ii	V1	Kx1	Kx2	V1is	V1ii	K2	Hill1	Hill2	K3	V2	Hill xx	Kxx1	V2i	K2i	K2 term	V2 term	V1 term	K1 term	cal	obs
42.2831	642.283	0.01	177.759	1.0241	2.68725	29.5164	34.0497	20.0556	30.1836	553.645	451.78	0	225.492	1.7135	2.68601	605.014	443.68	0.9611	70.9294	0	118.406	225.47	443.591	20.1735	177.719	139.271	139.926	0.654983
	642.283	0.06	177.759	1.0241	2.68725	29.5164	34.0497	20.0556	30.1836	553.645	451.78	0	225.492	1.7135	2.68601	605.014	443.68	0.9611	70.9294	0	118.406	225.372	443.186	20.7931	177.506	139.139	139.774	0.634655
	642.283	0.33	177.759	1.0241	2.68725	29.5164	34.0497	20.0556	30.1836	553.645	451.78	0	225.492	1.7135	2.68601	605.014	443.68	0.9611	70.9294	0	118.406	224.881	441.15	24.2479	176.32	138.455	138.763	0.307882
	642.283	1	177.759	1.0241	2.68725	29.5164	34.0497	20.0556	30.1836	553.645	451.78	0	225.492	1.7135	2.68601	605.014	443.68	0.9611	70.9294	0	118.406	223.739	436.417	32.8411	173.369	136.842	138.989	2.14799
	642.283	3.33	177.759	1.0241	2.68725	29.5164	34.0497	20.0556	30.1836	553.645	451.78	0	225.492	1.7135	2.68601	605.014	443.68	0.9611	70.9294	0	118.406	220.113	421.396	60.9432	163.719	131.824	132.487	0.66291
	642.283	6.66	177.759	1.0241	2.68725	29.5164	34.0497	20.0556	30.1836	553.645	451.78	0	225.492	1.7135	2.68601	605.014	443.68	0.9611	70.9294	0	118.406	215.496	402.268	95.7914	151.753	125.832	125.514	0.318545
	642.283	10	177.759	1.0241	2.68725	29.5164	34.0497	20.0556	30.1836	553.645	451.78	0	225.492	1.7135	2.68601	605.014	443.68	0.9611	70.9294	0	118.406	211.35	385.089	125.35	141.601	120.817	119.717	1.09931
	642.283	21	177.759	1.0241	2.68725	29.5164	34.0497	20.0556	30.1836	553.645	451.78	0	225.492	1.7135	2.68601	605.014	443.68	0.9611	70.9294	0	118.406	200.124	338.577	196.206	117.251	108.439	105.95	2.48899
	642.283	33.3	177.759	1.0241	2.68725	29.5164	34.0497	20.0556	30.1836	553.645	451.78	0	225.492	1.7135	2.68601	605.014	443.68	0.9611	70.9294	0	118.406	190.591	299.077	246.533	99.914	98.5448	101.912	3.36712
	642.283	45	177.759	1.0241	2.68725	29.5164	34.0497	20.0556	30.1836	553.645	451.78	0	225.492	1.7135	2.68601	605.014	443.68	0.9611	70.9294	0	118.406	183.473	269.589	278.924	88.6935	91.1294	92.3441	1.21469
	642.283	66.6	177.759	1.0241	2.68725	29.5164	34.0497	20.0556	30.1836	553.645	451.78	0	225.492	1.7135	2.68601	605.014	443.68	0.9611	70.9294	0	118.406	173.569	228.552	317.38	75.1591	80.4037	83.6182	3.21454
	642.283	100	177.759	1.0241	2.68725	29.5164	34.0497	20.0556	30.1836	553.645	451.78	0	225.492	1.7135	2.68601	605.014	443.68	0.9611	70.9294	0	118.406	163.19	185.551	349.384	63.176	68.3496	71.0981	2.74851
	642.283	333	177.759	1.0241	2.68725	29.5164	34.0497	20.0556	30.1836	553.645	451.78	0	225.492	1.7135	2.68601	605.014	443.68	0.9611	70.9294	0	118.406	138.161	81.849	325.937	42.1199	33.9522	34.5461	0.593888
	642.283	450	177.759	1.0241	2.68725	29.5164	34.0497	20.0556	30.1836	553.645	451.78	0	225.492	1.7135	2.68601	605.014	443.68	0.9611	70.9294	0	118.406	133.916	64.2607	261.695	39.9332	26.8301	30.9046	4.07448
	642.283	666	177.759	1.0241	2.68725	29.5164	34.0497	20.0556	30.1836	553.645	451.78	0	225.492	1.7135	2.68601	605.014	443.68	0.9611	70.9294	0	118.406	129.554	46.1867	153.508	38.3185	19.0907	26.7055	7.61483
	642.283	800	177.759	1.0241	2.68725	29.5164	34.0497	20.0556	30.1836	553.645	451.78	0	225.492	1.7135	2.68601	605.014	443.68	0.9611	70.9294	0	118.406	127.913	39.388	107.924	37.8151	16.1758	14.5679	1.6079
	642.283	1000	177.759	1.0241	2.68725	29.5164	34.0497	20.0556	30.1836	553.645	451.78	0	225.492	1.7135	2.68601	605.014	443.68	0.9611	70.9294	0	118.406	126.211	32.3393	64.9478	37.2826	13.2017	16.5326	3.33091
	642.283	1800	177.759	1.0241	2.68725	29.5164	34.0497	20.0556	30.1836	553.645	451.78	0	225.492	1.7135	2.68601	605.014	443.68	0.9611	70.9294	0	118.406	122.987	18.9788	11.7789	36.0856	7.70233	10.4121	2.70979
	642.283	3333	177.759	1.0241	2.68725	29.5164	34.0497	20.0556	30.1836	553.645	451.78	0	225.492	1.7135	2.68601	605.014	443.68	0.9611	70.9294	0	118.406	120.989	10.7028	0.13867	35.2026	4.34348	7.41628	3.0728
	642.283	6666	177.759	1.0241	2.68725	29.5164	34.0497	20.0556	30.1836	553.645	451.78	0	225.492	1.7135	2.68601	605.014	443.68	0.9611	70.9294	0	118.406	119.749	5.56291	-1.14668	34.6311	2.26002	4.55062	2.2906
	642.283	10000	177.759	1.0241	2.68725	29.5164	34.0497	20.0556	30.1836	553.645	451.78	0	225.492	1.7135	2.68601	605.014	443.68	0.9611	70.9294	0	118.406	119.319	3.78251	-0.94061	34.4359	1.53757	4.62865	3.09108
	642.283	21000	177.759	1.0241	2.68725	29.5164	34.0497	20.0556	30.1836	553.645	451.78	0	225.492	1.7135	2.68601	605.014	443.68	0.9611	70.9294	0	118.406	118.855	1.86203	-0.503516	34.2312	0.757468	0.93133	0.173862
	642.283	33000	177.759	1.0241	2.68725	29.5164	34.0497	20.0556	30.1836	553.645	451.78	0	225.492	1.7135	2.68601	605.014	443.68	0.9611	70.9294	0	118.406	118.698	1.20773	-0.325684	34.1641	0.491447	1.3824	0.890953
	642.283	100000	177.759	1.0241	2.68725	29.5164	34.0497	20.0556	30.1836	553.645	451.78	0	225.492	1.7135	2.68601	605.014	443.68	0.9611	70.9294	0	118.406	118.507	0.41686	-0.10677	34.0865	0.169699	0.55071	0.381011
																												48.6923
	642.283	50000	177.759	1.0241	2.68725	29.5164	34.0497	20.0556	30.1836	553.645	451.78	0	225.492	1.7135	2.68601	605.014	443.68	0.9611	70.9294	0	118.406	118.602	0.810819	-0.215366	34.1245	0.330001	-0.000425247	0.330426
	642.283	45000	177.759	1.0241	2.68725	29.5164	34.0497	20.0556	30.1836	553.645	451.78	0	225.492	1.7135	2.68601	605.014	443.68	0.9611	70.9294	0	118.406	118.623	0.897051	-0.239354	34.133	0.365081	-0.000473329	0.365554
	642.283	40500	177.759	1.0241	2.68725	29.5164	34.0497	20.0556	30.1836	553.645	451.78	0	225.492	1.7135	2.68601	605.014	443.68	0.9611	70.9294	0	118.406	118.646	0.992432	-0.265898	34.1425	0.403879	-0.000526676	0.404406
	642.283	36450	177.759	1.0241	2.68725	29.5164	34.0497	20.0556	30.1836	553.645	451.78	0	225.492	1.7135	2.68601	605.014	443.68	0.9611	70.9294	0	118.406	118.671	1.09793	-0.295229	34.153	0.44679	-0.000585797	0.447376
	642.283	32805	177.759	1.0241	2.68725	29.5164	34.0497	20.0556	30.1836	553.645	451.78	0	225.492	1.7135	2.68601	605.014	443.68	0.9611	70.9294	0	118.406	118.699	1.21461	-0.327589	34.1648	0.494245	-0.000651225	0.494896
	642.283	29524.5	177.759	1.0241	2.68725	29.5164	34.0497	20.0556	30.1836	553.645	451.78	0	225.492	1.7135	2.68601	605.014	443.68	0.9611	70.9294	0	118.406	118.73	1.34366	-0.363219	34.1779	0.546722	-0.000723509	0.547445
	642.283	26572	177.759	1.0241	2.68725	29.5164	34.0497	20.0556	30.1836	553.645	451.78	0	225.492	1.7135	2.68601	605.014	443.68	0.9611	70.9294	0	118.406	118.765	1.48637	-0.402358	34.1925	0.604749	-0.000803197	0.605552
	642.283	23914.8	177.759	1.0241	2.68725	29.5164	34.0497	20.0556	30.1836	553.645	451.78	0	225.492	1.7135	2.68601	605.014	443.68	0.9611	70.9294	0	118.406	118.803	1.64418	-0.445225	34.2087	0.668909	-0.000890817	0.6698
	642.283	21523.4	177.759	1.0241	2.68725	29.5164	34.0497	20.0556	30.1836	553.645	451.78	0	225.492	1.7135	2.68601	605.014	443.68	0.9611	70.9294	0	118.406	118.845	1.81867	-0.492006	34.2267	0.739844	-0.000986842	0.740831
	642.283	19371	177.759	1.0241	2.68725	29.5164	34.0497	20.0556	30.1836	553.645	451.78	0	225.492	1.7135	2.68601	605.014	443.68	0.9611	70.9294	0	118.406	118.892	2.0116	-0.542832	34.2468	0.818261	-0.00109165	0.819353
	642.283	17433.9	177.759	1.0241	2.68725	29.5164	34.0497	20.0556	30.1836	553.645	451.78	0	225.492	1.7135	2.68601	605.014	443.68	0.9611	70.9294	0	118.406	118.943	2.2249	-0.597743	34.2692	0.904943	-0.00120544	0.906148
	642.283	15690.5	177.759	1.0241	2.68725	29.5164	34.0497	20.0556	30.1836	553.645	451.78	0	225.492	1.7135	2.68601	605.014	443.68	0.9611	70.9294	0	118.406	119	2.46068	-0.656651	34.294	1.00075	-0.00132819	1.00208
	642.283	14121.5	177.759	1.0241	2.68725	29.5164	34.0497	20.0556	30.1836	553.645	451.78	0	225.492	1.7135	2.68601	605.014	443.68	0.9611	70.9294	0	118.406	119.063	2.7213	-0.719271	34.3217	1.10663	-0.00145947	1.10809
	642.283	12709.3	177.759	1.0241	2.68725	29.5164	34.0497	20.0556	30.1836	553.645	451.78	0	225.492	1.7135	2.68601	605.014	443.68	0.9611	70.9294	0	118.406	119.132	3.00933	-0.785049	34.3524	1.22362	-0.00159831	1.22522
	642.283	11438.4	177.759	1.0241	2.68725	29.5164	34.0497	20.0556	30.1836	553.645	451.78	0	225.492	1.7135	2.68601	605.014	443.68	0.9611	70.9294	0	118.406	119.209	3.32762	-0.853049	34.3866	1.35288	-0.00174298	1.35462
	642.283	10294.6	177.759	1.0241	2.68725	29.5164	34.0497	20.0556	30.1836	553.645	451.78	0	225.492	1.7135	2.68601	605.014	443.68	0.9611	70.9294	0	118.406	119.294	3.6793	-0.921804	34.4247	1.49567	-0.00189064	1.49756
	642.283	9265.1	177.759	1.0241	2.68725	29.5164	34.0497	20.0556	30.1836	553.645	451.78	0	225.492	1.7135	2.68601	605.014	443.68	0.9611	70.9294	0	118.406	119.388	4.06779	-0.989121	34.4669	1.65338	-0.00203692	1.65541
	642.283	8338.59	177.759	1.0241	2.68725	29.5164	34.0497	20.0556	30.1836	553.645	451.78	0	225.492	1.7135	2.68601	605.014	443.68	0.9611	70.9294	0	118.406	119.491	4.49689	-1.05182	34.5138	1.82753	-0.00217535	1.8297
	642.283	7504.73	177.759	1.0241	2.68725	29.5164	34.0497	20.0556	30.1836	553.645	451.78	0	225.492	1.7135	2.68601	605.014	443.68	0.9611	70.9294	0	118.406	119.606	4.97074	-1.10536	34.5658	2.01979	-0.00229658	2.02209
	642.283	6754.26	177.759	1.0241	2.68725	29.5164	34.0497	20.0556	30.1836	553.645	451.78	0	225.492	1.7135	2.68601	605.014	443.68	0.9611	70.9294	0	118.406	119.732	5.49389	-1.14342	34.6235	2.23202	-0.00238729	2.23441
	642.283	6078.83	177.759	1.0241	2.68725	29.5164	34.0497	20.0556	30.1836	553.645	451.78	0	225.492	1.7135	2.68601	605.014	443.68	0.9611	70.9294	0	118.406	119.871	6.07135	-1.15721	34.6874	2.46623	-0.00242878	2.46865
	642.283	5470.95	177.759	1.0241	2.68725	29.5164	34.0497	20.0556	30.1836	553.645	451.78	0	225.492	1.7135	2.68601	605.014	443.68	0.9611	70.9294	0	118.406	120.025	6.70856	-1.13472	34.7582	2.72461	-0.00239505	2.72701
	642.283	4923.85	177.759	1.0241	2.68725	29.5164	34.0497	20.0556	30.1836	553.645	451.78	0	225.492	1.7135	2.68601	605.014	443.68	0.9611	70.9294	0	118.406	120.195	7.41153	-1.05955	34.8364	3.0096	-0.00225015	3.01185
	642.283	4431.47	177.759	1.0241	2.68725	29.5164	34.0497	20.0556	30.1836	553.645	451.78	0	225.492	1.7135	2.68601	605.014	443.68	0.9611	70.9294	0	118.406	120.382	8.18678	-0.909593	34.9228	3.32384	-0.0019447	3.32578
	642.283	3988.32	177.759	1.0241	2.68725	29.5164	34.0497	20.0556	30.1836	553.645	451.78	0	225.492	1.7135	2.68601	605.014	443.68	0.9611	70.9294	0	118.406	120.588	9.04144	-0.655096	35.018	3.67022	-0.00141103	3.67163
	642.283	3589.49	177.759	1.0241	2.68725	29.5164	34.0497	20.0556	30.1836	553.645	451.78	0	225.492	1.7135	2.68601	605.014	443.68	0.9611	70.9294	0	118.406	120.816	9.98327	-0.256315	35.1228	4.0519	-0.000556705	4.05245
	642.283	3230.54	177.759	1.0241	2.68725	29.5164	34.0497	20.0556	30.1836	553.645	451.78	0	225.492	1.7135	2.68601	605.014	443.68	0.9611	70.9294	0	118.406	121.066	11.0207	0.339565	35.2377	4.47233	0.000744544	4.47158
	642.283	2907.49	177.759	1.0241	2.68725	29.5164	34.0497	20.0556	30.1836	553.645	451.78	0	225.492	1.7135	2.68601	605.014	443.68	0.9611	70.9294	0	118.406	121.342	12.163	1.20229	35.3636	4.93527	0.00266518	4.93261
	642.283	2616.74	177.759	1.0241	2.68725	29.5164	34.0497	20.0556	30.1836	553.645	451.78	0	225.492	1.7135	2.68601	605.014	443.68	0.9611	70.9294	0	118.406	121.645	13.4199	2.42333	35.5008	5.44484	0.00544115	5.4394
	642.283	2355.06	177.759	1.0241	2.68725	29.5164	34.0497	20.0556	30.1836	553.645	451.78	0	225.492	1.7135	2.68601	605.014	443.68	0.9611	70.9294	0	118.406	121.979	14.8023	4.12159	35.65	6.00552	0.00939606	5.99612
	642.283	2119.56	177.759	1.0241	2.68725	29.5164	34.0497	20.0556	30.1836	553.645	451.78	0	225.492	1.7135	2.68601	605.014	443.68	0.9611	70.9294	0	118.406	122.345	16.3217	6.45011	35.8113	6.62221	0.0149752	6.60724
	642.283	1907.6	177.759	1.0241	2.68725	29.5164	34.0497	20.0556	30.1836	553.645	451.78	0	225.492	1.7135	2.68601	605.014	443.68	0.9611	70.9294	0	118.406	122.748	17.9906	9.60311	35.9848	7.3003	0.0227932	7.2775
	642.283	1716.84	177.759	1.0241	2.68725	29.5164	34.0497	20.0556	30.1836	553.645	451.78	0	225.492	1.7135	2.68601	605.014	443.68	0.9611	70.9294	0	118.406	123.19	19.8221	13.8228	36.1703	8.04568	0.0337002	8.01198
	642.283	1545.16	177.759	1.0241	2.68725	29.5164	34.0497	20.0556	30.1836	553.645	451.78	0	225.492	1.7135	2.68601	605.014	443.68	0.9611	70.9294	0	118.406	123.675	21.8305	19.4041	36.3672	8.8649	0.048872	8.81603
	642.283	1390.64	177.759	1.0241	2.68725	29.5164	34.0497	20.0556	30.1836	553.645	451.78	0	225.492	1.7135	2.68601	605.014	443.68	0.9611	70.9294	0	118.406	124.206	24.0309	26.6946	36.5747	9.76519	0.0699251	9.69526
	642.283	1251.58	177.759	1.0241	2.68725	29.5164	34.0497	20.0556	30.1836	553.645	451.78	0	225.492	1.7135	2.68601	605.014	443.68	0.9611	70.9294	0	118.406	124.787	26.4392	36.0857	36.7918	10.7546	0.0990524	10.6556
	642.283	1126.42	177.759	1.0241	2.68725	29.5164	34.0497	20.0556	30.1836	553.645	451.78	0	225.492	1.7135	2.68601	605.014	443.68	0.9611	70.9294	0	118.406	125.423	29.0721	47.9894	37.0176	11.8422	0.139152	11.7031
	642.283	1013.78	177.759	1.0241	2.68725	29.5164	34.0497	20.0556	30.1836	553.645	451.78	0	225.492	1.7135	2.68601	605.014	443.68	0.9611	70.9294	0	118.406	126.117	31.9472	62.7948	37.2516	13.0379	0.19389	12.844
	642.283	912.4	177.759	1.0241	2.68725	29.5164	34.0497	20.0556	30.1836	553.645	451.78	0	225.492	1.7135	2.68601	605.014	443.68	0.9611	70.9294	0	118.406	126.873	35.0825	80.8017	37.4946	14.3524	0.267579	14.0848
	642.283	821.16	177.759	1.0241	2.68725	29.5164	34.0497	20.0556	30.1836	553.645	451.78	0	225.492	1.7135	2.68601	605.014	443.68	0.9611	70.9294	0	118.406	127.698	38.4967	102.134	37.7495	15.7966	0.36473	15.4319
	642.283	739.044	177.759	1.0241	2.68725	29.5164	34.0497	20.0556	30.1836	553.645	451.78	0	225.492	1.7135	2.68601	605.014	443.68	0.9611	70.9294	0	118.406	128.593	42.2089	126.647	38.0222	17.3808	0.489111	16.8917
	642.283	665.14	177.759	1.0241	2.68725	29.5164	34.0497	20.0556	30.1836	553.645	451.78	0	225.492	1.7135	2.68601	605.014	443.68	0.9611	70.9294	0	118.406	129.566	46.2382	153.855	38.3224	19.1128	0.642341	18.4705
	642.283	598.626	177.759	1.0241	2.68725	29.5164	34.0497	20.0556	30.1836	553.645	451.78	0	225.492	1.7135	2.68601	605.014	443.68	0.9611	70.9294	0	118.406	130.62	50.6036	182.92	38.6638	20.9965	0.822278	20.1742
	642.283	538.763	177.759	1.0241	2.68725	29.5164	34.0497	20.0556	30.1836	553.645	451.78	0	225.492	1.7135	2.68601	605.014	443.68	0.9611	70.9294	0	118.406	131.759	55.3238	212.713	39.0632	23.0302	1.02186	22.0083
	642.283	484.887	177.759	1.0241	2.68725	29.5164	34.0497	20.0556	30.1836	553.645	451.78	0	225.492	1.7135	2.68601	605.014	443.68	0.9611	70.9294	0	118.406	132.988	60.4167	241.965	39.5392	25.207	1.22905	23.9779
	642.283	436.398	177.759	1.0241	2.68725	29.5164	34.0497	20.0556	30.1836	553.645	451.78	0	225.492	1.7135	2.68601	605.014	443.68	0.9611	70.9294	0	118.406	134.311	65.8988	269.458	40.1105	27.5154	1.42833	26.0871
	642.283	392.758	177.759	1.0241	2.68725	29.5164	34.0497	20.0556	30.1836	553.645	451.78	0	225.492	1.7135	2.68601	605.014	443.68	0.9611	70.9294	0	118.406	135.732	71.7852	294.194	40.7936	29.9422	1.60316	28.339
	642.283	353.483	177.759	1.0241	2.68725	29.5164	34.0497	20.0556	30.1836	553.645	451.78	0	225.492	1.7135	2.68601	605.014	443.68	0.9611	70.9294	0	118.406	137.253	78.0887	315.51	41.6022	32.4747	1.73876	30.7359
	642.283	318.134	177.759	1.0241	2.68725	29.5164	34.0497	20.0556	30.1836	553.645	451.78	0	225.492	1.7135	2.68601	605.014	443.68	0.9611	70.9294	0	118.406	138.878	84.8194	333.094	42.5464	35.1022	1.82395	33.2783
	642.283	286.321	177.759	1.0241	2.68725	29.5164	34.0497	20.0556	30.1836	553.645	451.78	0	225.492	1.7135	2.68601	605.014	443.68	0.9611	70.9294	0	118.406	140.607	91.9844	346.943	43.6339	37.8172	1.8519	35.9653
	642.283	257.689	177.759	1.0241	2.68725	29.5164	34.0497	20.0556	30.1836	553.645	451.78	0	225.492	1.7135	2.68601	605.014	443.68	0.9611	70.9294	0	118.406	142.442	99.5866	357.272	44.8699	40.6141	1.81974	38.7943
	642.283	231.92	177.759	1.0241	2.68725	29.5164	34.0497	20.0556	30.1836	553.645	451.78	0	225.492	1.7135	2.68601	605.014	443.68	0.9611	70.9294	0	118.406	144.382	107.625	364.426	46.2584	43.4884	1.72757	41.7608
	642.283	208.728	177.759	1.0241	2.68725	29.5164	34.0497	20.0556	30.1836	553.645	451.78	0	225.492	1.7135	2.68601	605.014	443.68	0.9611	70.9294	0	118.406	146.426	116.093	368.8	47.803	46.4355	1.57741	44.858
	642.283	187.855	177.759	1.0241	2.68725	29.5164	34.0497	20.0556	30.1836	553.645	451.78	0	225.492	1.7135	2.68601	605.014	443.68	0.9611	70.9294	0	118.406	148.571	124.98	370.787	49.5067	49.4497	1.37229	48.0774
	642.283	169.07	177.759	1.0241	2.68725	29.5164	34.0497	20.0556	30.1836	553.645	451.78	0	225.492	1.7135	2.68601	605.014	443.68	0.9611	70.9294	0	118.406	150.813	134.268	370.746	51.3726	52.5235	1.11563	51.4079
	642.283	152.163	177.759	1.0241	2.68725	29.5164	34.0497	20.0556	30.1836	553.645	451.78	0	225.492	1.7135	2.68601	605.014	443.68	0.9611	70.9294	0	118.406	153.146	143.934	368.988	53.4037	55.6477	0.810992	54.8367
	642.283	136.946	177.759	1.0241	2.68725	29.5164	34.0497	20.0556	30.1836	553.645	451.78	0	225.492	1.7135	2.68601	605.014	443.68	0.9611	70.9294	0	118.406	155.563	153.951	365.771	55.6025	58.8108	0.461984	58.3488
	642.283	123.252	177.759	1.0241	2.68725	29.5164	34.0497	20.0556	30.1836	553.645	451.78	0	225.492	1.7135	2.68601	605.014	443.68	0.9611	70.9294	0	118.406	158.057	164.282	361.306	57.971	62.0001	0.0723624	61.9277
	642.283	110.927	177.759	1.0241	2.68725	29.5164	34.0497	20.0556	30.1836	553.645	451.78	0	225.492	1.7135	2.68601	605.014	443.68	0.9611	70.9294	0	118.406	160.617	174.888	355.762	60.5103	65.2014	-0.353823	65.5552
	642.283	99.8339	177.759	1.0241	2.68725	29.5164	34.0497	20.0556	30.1836	553.645	451.78	0	225.492	1.7135	2.68601	605.014	443.68	0.9611	70.9294	0	118.406	163.232	185.724	349.275	63.22	68.3999	-0.812053	69.212
	642.283	89.8505	177.759	1.0241	2.68725	29.5164	34.0497	20.0556	30.1836	553.645	451.78	0	225.492	1.7135	2.68601	605.014	443.68	0.9611	70.9294	0	118.406	165.891	196.74	341.957	66.0985	71.581	-1.29718	72.8782
	642.283	80.8655	177.759	1.0241	2.68725	29.5164	34.0497	20.0556	30.1836	553.645	451.78	0	225.492	1.7135	2.68601	605.014	443.68	0.9611	70.9294	0	118.406	168.58	207.882	333.899	69.142	74.7302	-1.80332	76.5335
	642.283	72.7789	177.759	1.0241	2.68725	29.5164	34.0497	20.0556	30.1836	553.645	451.78	0	225.492	1.7135	2.68601	605.014	443.68	0.9611	70.9294	0	118.406	171.287	219.096	325.181	72.3446	77.8341	-2.32383	80.1579
	642.283	65.501	177.759	1.0241	2.68725	29.5164	34.0497	20.0556	30.1836	553.645	451.78	0	225.492	1.7135	2.68601	605.014	443.68	0.9611	70.9294	0	118.406	173.996	230.323	315.874	75.6983	80.8805	-2.85131	83.7318
	642.283	58.9509	177.759	1.0241	2.68725	29.5164	34.0497	20.0556	30.1836	553.645	451.78	0	225.492	1.7135	2.68601	605.014	443.68	0.9611	70.9294	0	118.406	176.696	241.508	306.045	79.1926	83.8591	-3.37775	87.2368
	642.283	53.0558	177.759	1.0241	2.68725	29.5164	34.0497	20.0556	30.1836	553.645	451.78	0	225.492	1.7135	2.68601	605.014	443.68	0.9611	70.9294	0	118.406	179.371	252.592	295.759	82.8144	86.7613	-3.89468	90.656
	642.283	47.7502	177.759	1.0241	2.68725	29.5164	34.0497	20.0556	30.1836	553.645	451.78	0	225.492	1.7135	2.68601	605.014	443.68	0.9611	70.9294	0	118.406	182.009	263.522	285.082	86.5484	89.5805	-4.39349	93.974
	642.283	42.9752	177.759	1.0241	2.68725	29.5164	34.0497	20.0556	30.1836	553.645	451.78	0	225.492	1.7135	2.68601	605.014	443.68	0.9611	70.9294	0	118.406	184.598	274.247	274.082	90.3769	92.3119	-4.86568	97.1775
	642.283	38.6777	177.759	1.0241	2.68725	29.5164	34.0497	20.0556	30.1836	553.645	451.78	0	225.492	1.7135	2.68601	605.014	443.68	0.9611	70.9294	0	118.406	187.125	284.718	262.826	94.2804	94.9523	-5.30319	100.256
	642.283	34.8099	177.759	1.0241	2.68725	29.5164	34.0497	20.0556	30.1836	553.645	451.78	0	225.492	1.7135	2.68601	605.014	443.68	0.9611	70.9294	0	118.406	189.581	294.892	251.386	98.2377	97.5002	-5.69877	103.199
	642.283	31.3289	177.759	1.0241	2.68725	29.5164	34.0497	20.0556	30.1836	553.645	451.78	0	225.492	1.7135	2.68601	605.014	443.68	0.9611	70.9294	0	118.406	191.956	304.734	239.833	102.226	99.955	-6.04625	106.001
	642.283	28.196	177.759	1.0241	2.68725	29.5164	34.0497	20.0556	30.1836	553.645	451.78	0	225.492	1.7135	2.68601	605.014	443.68	0.9611	70.9294	0	118.406	194.243	314.21	228.24	106.224	102.317	-6.34077	108.658
	642.283	25.3764	177.759	1.0241	2.68725	29.5164	34.0497	20.0556	30.1836	553.645	451.78	0	225.492	1.7135	2.68601	605.014	443.68	0.9611	70.9294	0	118.406	196.436	323.296	216.679	110.206	104.587	-6.579	111.166
	642.283	22.8388	177.759	1.0241	2.68725	29.5164	34.0497	20.0556	30.1836	553.645	451.78	0	225.492	1.7135	2.68601	605.014	443.68	0.9611	70.9294	0	118.406	198.53	331.97	205.219	114.15	106.767	-6.75922	113.526
	642.283	20.5549	177.759	1.0241	2.68725	29.5164	34.0497	20.0556	30.1836	553.645	451.78	0	225.492	1.7135	2.68601	605.014	443.68	0.9611	70.9294	0	118.406	200.521	340.219	193.926	118.035	108.856	-6.88129	115.738
	642.283	18.4994	177.759	1.0241	2.68725	29.5164	34.0497	20.0556	30.1836	553.645	451.78	0	225.492	1.7135	2.68601	605.014	443.68	0.9611	70.9294	0	118.406	202.407	348.035	182.863	121.839	110.858	-6.9466	117.804
	642.283	16.6495	177.759	1.0241	2.68725	29.5164	34.0497	20.0556	30.1836	553.645	451.78	0	225.492	1.7135	2.68601	605.014	443.68	0.9611	70.9294	0	118.406	204.188	355.414	172.085	125.544	112.771	-6.95791	119.729
	642.283	14.9845	177.759	1.0241	2.68725	29.5164	34.0497	20.0556	30.1836	553.645	451.78	0	225.492	1.7135	2.68601	605.014	443.68	0.9611	70.9294	0	118.406	205.863	362.356	161.642	129.133	114.598	-6.91912	121.517
	642.283	13.4861	177.759	1.0241	2.68725	29.5164	34.0497	20.0556	30.1836	553.645	451.78	0	225.492	1.7135	2.68601	605.014	443.68	0.9611	70.9294	0	118.406	207.435	368.867	151.578	132.591	116.339	-6.83505	123.174
	642.283	12.1375	177.759	1.0241	2.68725	29.5164	34.0497	20.0556	30.1836	553.645	451.78	0	225.492	1.7135	2.68601	605.014	443.68	0.9611	70.9294	0	118.406	208.905	374.956	141.927	135.907	117.994	-6.71114	124.705
	642.283	10.9237	177.759	1.0241	2.68725	29.5164	34.0497	20.0556	30.1836	553.645	451.78	0	225.492	1.7135	2.68601	605.014	443.68	0.9611	70.9294	0	118.406	210.275	380.634	132.717	139.07	119.565	-6.55323	126.118
	642.283	9.83135	177.759	1.0241	2.68725	29.5164	34.0497	20.0556	30.1836	553.645	451.78	0	225.492	1.7135	2.68601	605.014	443.68	0.9611	70.9294	0	118.406	211.55	385.915	123.97	142.075	121.051	-6.36724	127.418
	642.283	8.84822	177.759	1.0241	2.68725	29.5164	34.0497	20.0556	30.1836	553.645	451.78	0	225.492	1.7135	2.68601	605.014	443.68	0.9611	70.9294	0	118.406	212.732	390.815	115.698	144.916	122.454	-6.15905	128.613
	642.283	7.9634	177.759	1.0241	2.68725	29.5164	34.0497	20.0556	30.1836	553.645	451.78	0	225.492	1.7135	2.68601	605.014	443.68	0.9611	70.9294	0	118.406	213.827	395.352	107.907	147.592	123.775	-5.93425	129.709
	642.283	7.16706	177.759	1.0241	2.68725	29.5164	34.0497	20.0556	30.1836	553.645	451.78	0	225.492	1.7135	2.68601	605.014	443.68	0.9611	70.9294	0	118.406	214.839	399.543	100.599	150.102	125.015	-5.69804	130.713
	642.283	6.45035	177.759	1.0241	2.68725	29.5164	34.0497	20.0556	30.1836	553.645	451.78	0	225.492	1.7135	2.68601	605.014	443.68	0.9611	70.9294	0	118.406	215.772	403.407	93.7677	152.448	126.176	-5.4551	131.632
	642.283	5.80532	177.759	1.0241	2.68725	29.5164	34.0497	20.0556	30.1836	553.645	451.78	0	225.492	1.7135	2.68601	605.014	443.68	0.9611	70.9294	0	118.406	216.63	406.965	87.4049	154.633	127.261	-5.20958	132.471
	642.283	5.22478	177.759	1.0241	2.68725	29.5164	34.0497	20.0556	30.1836	553.645	451.78	0	225.492	1.7135	2.68601	605.014	443.68	0.9611	70.9294	0	118.406	217.419	410.234	81.497	156.661	128.272	-4.96503	133.237
	642.283	4.70231	177.759	1.0241	2.68725	29.5164	34.0497	20.0556	30.1836	553.645	451.78	0	225.492	1.7135	2.68601	605.014	443.68	0.9611	70.9294	0	118.406	218.143	413.234	76.0277	158.54	129.211	-4.72443	133.936
	642.283	4.23207	177.759	1.0241	2.68725	29.5164	34.0497	20.0556	30.1836	553.645	451.78	0	225.492	1.7135	2.68601	605.014	443.68	0.9611	70.9294	0	118.406	218.807	415.983	70.9782	160.273	130.082	-4.49021	134.572
	642.283	3.80887	177.759	1.0241	2.68725	29.5164	34.0497	20.0556	30.1836	553.645	451.78	0	225.492	1.7135	2.68601	605.014	443.68	0.9611	70.9294	0	118.406	219.414	418.499	66.3281	161.87	130.887	-4.26426	135.151
	642.283	3.42798	177.759	1.0241	2.68725	29.5164	34.0497	20.0556	30.1836	553.645	451.78	0	225.492	1.7135	2.68601	605.014	443.68	0.9611	70.9294	0	118.406	219.969	420.799	62.0558	163.337	131.63	-4.04804	135.678
	642.283	3.08518	177.759	1.0241	2.68725	29.5164	34.0497	20.0556	30.1836	553.645	451.78	0	225.492	1.7135	2.68601	605.014	443.68	0.9611	70.9294	0	118.406	220.476	422.899	58.139	164.682	132.315	-3.84255	136.157
	642.283	2.77666	177.759	1.0241	2.68725	29.5164	34.0497	20.0556	30.1836	553.645	451.78	0	225.492	1.7135	2.68601	605.014	443.68	0.9611	70.9294	0	118.406	220.939	424.815	54.555	165.913	132.944	-3.64847	136.593
	642.283	2.499	177.759	1.0241	2.68725	29.5164	34.0497	20.0556	30.1836	553.645	451.78	0	225.492	1.7135	2.68601	605.014	443.68	0.9611	70.9294	0	118.406	221.36	426.562	51.2816	167.037	133.522	-3.46616	136.988
	642.283	2.2491	177.759	1.0241	2.68725	29.5164	34.0497	20.0556	30.1836	553.645	451.78	0	225.492	1.7135	2.68601	605.014	443.68	0.9611	70.9294	0	118.406	221.744	428.153	48.2967	168.062	134.051	-3.29572	137.347
	642.283	2.02419	177.759	1.0241	2.68725	29.5164	34.0497	20.0556	30.1836	553.645	451.78	0	225.492	1.7135	2.68601	605.014	443.68	0.9611	70.9294	0	118.406	222.094	429.601	45.579	168.995	134.535	-3.13708	137.672
	642.283	1.82177	177.759	1.0241	2.68725	29.5164	34.0497	20.0556	30.1836	553.645	451.78	0	225.492	1.7135	2.68601	605.014	443.68	0.9611	70.9294	0	118.406	222.411	430.917	43.1078	169.844	134.977	-2.98996	137.967
	642.283	1.63959	177.759	1.0241	2.68725	29.5164	34.0497	20.0556	30.1836	553.645	451.78	0	225.492	1.7135	2.68601	605.014	443.68	0.9611	70.9294	0	118.406	222.7	432.115	40.8636	170.614	135.381	-2.854	138.235
	642.283	1.47563	177.759	1.0241	2.68725	29.5164	34.0497	20.0556	30.1836	553.645	451.78	0	225.492	1.7135	2.68601	605.014	443.68	0.9611	70.9294	0	118.406	222.963	433.202	38.8279	171.313	135.749	-2.72874	138.477
	642.283	1.32807	177.759	1.0241	2.68725	29.5164	34.0497	20.0556	30.1836	553.645	451.78	0	225.492	1.7135	2.68601	605.014	443.68	0.9611	70.9294	0	118.406	223.201	434.189	36.9831	171.947	136.084	-2.61363	138.697
	642.283	1.19526	177.759	1.0241	2.68725	29.5164	34.0497	20.0556	30.1836	553.645	451.78	0	225.492	1.7135	2.68601	605.014	443.68	0.9611	70.9294	0	118.406	223.417	435.086	35.3129	172.52	136.388	-2.50812	138.896
	642.283	1.07574	177.759	1.0241	2.68725	29.5164	34.0497	20.0556	30.1836	553.645	451.78	0	225.492	1.7135	2.68601	605.014	443.68	0.9611	70.9294	0	118.406	223.614	435.899	33.8021	173.039	136.665	-2.41161	139.076
	642.283	0.968163	177.759	1.0241	2.68725	29.5164	34.0497	20.0556	30.1836	553.645	451.78	0	225.492	1.7135	2.68601	605.014	443.68	0.9611	70.9294	0	118.406	223.792	436.636	32.4364	173.508	136.916	-2.32351	139.24
	642.283	0.871347	177.759	1.0241	2.68725	29.5164	34.0497	20.0556	30.1836	553.645	451.78	0	225.492	1.7135	2.68601	605.014	443.68	0.9611	70.9294	0	118.406	223.953	437.305	31.2027	173.932	137.144	-2.24322	139.387
	642.283	0.784212	177.759	1.0241	2.68725	29.5164	34.0497	20.0556	30.1836	553.645	451.78	0	225.492	1.7135	2.68601	605.014	443.68	0.9611	70.9294	0	118.406	224.099	437.911	30.0891	174.314	137.351	-2.17016	139.521
	642.283	0.705791	177.759	1.0241	2.68725	29.5164	34.0497	20.0556	30.1836	553.645	451.78	0	225.492	1.7135	2.68601	605.014	443.68	0.9611	70.9294	0	118.406	224.232	438.46	29.0843	174.659	137.538	-2.10378	139.642
	642.283	0.635212	177.759	1.0241	2.68725	29.5164	34.0497	20.0556	30.1836	553.645	451.78	0	225.492	1.7135	2.68601	605.014	443.68	0.9611	70.9294	0	118.406	224.352	438.957	28.1782	174.97	137.708	-2.04353	139.752
	642.283	0.571691	177.759	1.0241	2.68725	29.5164	34.0497	20.0556	30.1836	553.645	451.78	0	225.492	1.7135	2.68601	605.014	443.68	0.9611	70.9294	0	118.406	224.46	439.408	27.3615	175.251	137.862	-1.98892	139.851
	642.283	0.514522	177.759	1.0241	2.68725	29.5164	34.0497	20.0556	30.1836	553.645	451.78	0	225.492	1.7135	2.68601	605.014	443.68	0.9611	70.9294	0	118.406	224.559	439.815	26.6256	175.503	138.001	-1.93945	139.94
	642.283	0.463069	177.759	1.0241	2.68725	29.5164	34.0497	20.0556	30.1836	553.645	451.78	0	225.492	1.7135	2.68601	605.014	443.68	0.9611	70.9294	0	118.406	224.648	440.185	25.9628	175.731	138.127	-1.8947	140.021
	642.283	0.416762	177.759	1.0241	2.68725	29.5164	34.0497	20.0556	30.1836	553.645	451.78	0	225.492	1.7135	2.68601	605.014	443.68	0.9611	70.9294	0	118.406	224.729	440.519	25.366	175.936	138.24	-1.85424	140.095
	642.283	0.375086	177.759	1.0241	2.68725	29.5164	34.0497	20.0556	30.1836	553.645	451.78	0	225.492	1.7135	2.68601	605.014	443.68	0.9611	70.9294	0	118.406	224.802	440.821	24.8289	176.12	138.343	-1.81768	140.161
	642.283	0.337578	177.759	1.0241	2.68725	29.5164	34.0497	20.0556	30.1836	553.645	451.78	0	225.492	1.7135	2.68601	605.014	443.68	0.9611	70.9294	0	118.406	224.868	441.095	24.3455	176.286	138.436	-1.78468	140.221
	642.283	0.30382	177.759	1.0241	2.68725	29.5164	34.0497	20.0556	30.1836	553.645	451.78	0	225.492	1.7135	2.68601	605.014	443.68	0.9611	70.9294	0	118.406	224.928	441.343	23.9106	176.436	138.52	-1.75489	140.275
	642.283	0.273438	177.759	1.0241	2.68725	29.5164	34.0497	20.0556	30.1836	553.645	451.78	0	225.492	1.7135	2.68601	605.014	443.68	0.9611	70.9294	0	118.406	224.982	441.567	23.5195	176.57	138.596	-1.72803	140.324
	642.283	0.246094	177.759	1.0241	2.68725	29.5164	34.0497	20.0556	30.1836	553.645	451.78	0	225.492	1.7135	2.68601	605.014	443.68	0.9611	70.9294	0	118.406	225.03	441.769	23.1678	176.691	138.665	-1.70382	140.368
	642.283	0.221485	177.759	1.0241	2.68725	29.5164	34.0497	20.0556	30.1836	553.645	451.78	0	225.492	1.7135	2.68601	605.014	443.68	0.9611	70.9294	0	118.406	225.075	441.952	22.8515	176.799	138.727	-1.682	140.409
	642.283	0.199336	177.759	1.0241	2.68725	29.5164	34.0497	20.0556	30.1836	553.645	451.78	0	225.492	1.7135	2.68601	605.014	443.68	0.9611	70.9294	0	118.406	225.115	442.118	22.5672	176.897	138.782	-1.66234	140.445
	642.283	0.179403	177.759	1.0241	2.68725	29.5164	34.0497	20.0556	30.1836	553.645	451.78	0	225.492	1.7135	2.68601	605.014	443.68	0.9611	70.9294	0	118.406	225.151	442.268	22.3117	176.985	138.833	-1.64464	140.477
	642.283	0.161462	177.759	1.0241	2.68725	29.5164	34.0497	20.0556	30.1836	553.645	451.78	0	225.492	1.7135	2.68601	605.014	443.68	0.9611	70.9294	0	118.406	225.184	442.404	22.082	177.063	138.878	-1.6287	140.507
	642.283	0.145316	177.759	1.0241	2.68725	29.5164	34.0497	20.0556	30.1836	553.645	451.78	0	225.492	1.7135	2.68601	605.014	443.68	0.9611	70.9294	0	118.406	225.213	442.526	21.8756	177.134	138.92	-1.61436	140.534
	642.283	0.130784	177.759	1.0241	2.68725	29.5164	34.0497	20.0556	30.1836	553.645	451.78	0	225.492	1.7135	2.68601	605.014	443.68	0.9611	70.9294	0	118.406	225.24	442.637	21.6902	177.198	138.957	-1.60146	140.558
	642.283	0.117706	177.759	1.0241	2.68725	29.5164	34.0497	20.0556	30.1836	553.645	451.78	0	225.492	1.7135	2.68601	605.014	443.68	0.9611	70.9294	0	118.406	225.264	442.737	21.5235	177.255	138.99	-1.58985	140.58

## Sheet: s400 
			K1	Hilli1 x	Hill2 x	K1is	K1ii	V1	Kx1	Kx2	V1is	V1ii	K2	Hill1	Hill2	K3	V2	Hill xx	Kxx1	V2i	K2i
		42.2831	177.759	1.0241	2.68725	29.5164	34.0497	20.0556	30.1836	553.645	451.78	0	225.492	1.7135	2.68601	605.014	443.68	0.9611	70.9294	0	118.406
	S	I	K1	Hilli1 x	Hill2 x	K1is	K1ii	V1	Kx1	Kx2	V1is	V1ii	K2	Hill1	Hill2	K3	V2	Hill xx	Kxx1	V2i	K2i	K2 term	V2 term	V1 term	K1 term	cal	obs
42.2831	442.283	0.01	177.759	1.0241	2.68725	29.5164	34.0497	20.0556	30.1836	553.645	451.78	0	225.492	1.7135	2.68601	605.014	443.68	0.9611	70.9294	0	118.406	225.47	443.591	20.1735	177.719	202.713	189.983	12.7303
	442.283	0.06	177.759	1.0241	2.68725	29.5164	34.0497	20.0556	30.1836	553.645	451.78	0	225.492	1.7135	2.68601	605.014	443.68	0.9611	70.9294	0	118.406	225.372	443.186	20.7931	177.506	202.56	189.742	12.8178
	442.283	0.33	177.759	1.0241	2.68725	29.5164	34.0497	20.0556	30.1836	553.645	451.78	0	225.492	1.7135	2.68601	605.014	443.68	0.9611	70.9294	0	118.406	224.881	441.15	24.2479	176.32	201.78	188.741	13.0388
	442.283	1	177.759	1.0241	2.68725	29.5164	34.0497	20.0556	30.1836	553.645	451.78	0	225.492	1.7135	2.68601	605.014	443.68	0.9611	70.9294	0	118.406	223.739	436.417	32.8411	173.369	199.958	189.363	10.5954
	442.283	3.33	177.759	1.0241	2.68725	29.5164	34.0497	20.0556	30.1836	553.645	451.78	0	225.492	1.7135	2.68601	605.014	443.68	0.9611	70.9294	0	118.406	220.113	421.396	60.9432	163.719	194.289	186.03	8.25894
	442.283	6.66	177.759	1.0241	2.68725	29.5164	34.0497	20.0556	30.1836	553.645	451.78	0	225.492	1.7135	2.68601	605.014	443.68	0.9611	70.9294	0	118.406	215.496	402.268	95.7914	151.753	187.418	179.153	8.26443
	442.283	10	177.759	1.0241	2.68725	29.5164	34.0497	20.0556	30.1836	553.645	451.78	0	225.492	1.7135	2.68601	605.014	443.68	0.9611	70.9294	0	118.406	211.35	385.089	125.35	141.601	181.537	183.765	2.22784
	442.283	21	177.759	1.0241	2.68725	29.5164	34.0497	20.0556	30.1836	553.645	451.78	0	225.492	1.7135	2.68601	605.014	443.68	0.9611	70.9294	0	118.406	200.124	338.577	196.206	117.251	166.373	153.394	12.9787
	442.283	33.3	177.759	1.0241	2.68725	29.5164	34.0497	20.0556	30.1836	553.645	451.78	0	225.492	1.7135	2.68601	605.014	443.68	0.9611	70.9294	0	118.406	190.591	299.077	246.533	99.914	153.517	145.848	7.66888
	442.283	45	177.759	1.0241	2.68725	29.5164	34.0497	20.0556	30.1836	553.645	451.78	0	225.492	1.7135	2.68601	605.014	443.68	0.9611	70.9294	0	118.406	183.473	269.589	278.924	88.6935	143.487	131.998	11.4886
	442.283	66.6	177.759	1.0241	2.68725	29.5164	34.0497	20.0556	30.1836	553.645	451.78	0	225.492	1.7135	2.68601	605.014	443.68	0.9611	70.9294	0	118.406	173.569	228.552	317.38	75.1591	128.497	122.906	5.59097
	442.283	100	177.759	1.0241	2.68725	29.5164	34.0497	20.0556	30.1836	553.645	451.78	0	225.492	1.7135	2.68601	605.014	443.68	0.9611	70.9294	0	118.406	163.19	185.551	349.384	63.176	111.119	90	21.1195
	442.283	333	177.759	1.0241	2.68725	29.5164	34.0497	20.0556	30.1836	553.645	451.78	0	225.492	1.7135	2.68601	605.014	443.68	0.9611	70.9294	0	118.406	138.161	81.849	325.937	42.1199	58.1117	53.9055	4.20625
	442.283	450	177.759	1.0241	2.68725	29.5164	34.0497	20.0556	30.1836	553.645	451.78	0	225.492	1.7135	2.68601	605.014	443.68	0.9611	70.9294	0	118.406	133.916	64.2607	261.695	39.9332	45.8073	43.0928	2.7145
	442.283	666	177.759	1.0241	2.68725	29.5164	34.0497	20.0556	30.1836	553.645	451.78	0	225.492	1.7135	2.68601	605.014	443.68	0.9611	70.9294	0	118.406	129.554	46.1867	153.508	38.3185	31.703	33.7997	2.09668
	442.283	800	177.759	1.0241	2.68725	29.5164	34.0497	20.0556	30.1836	553.645	451.78	0	225.492	1.7135	2.68601	605.014	443.68	0.9611	70.9294	0	118.406	127.913	39.388	107.924	37.8151	26.3303	21.1111	5.21921
	442.283	1000	177.759	1.0241	2.68725	29.5164	34.0497	20.0556	30.1836	553.645	451.78	0	225.492	1.7135	2.68601	605.014	443.68	0.9611	70.9294	0	118.406	126.211	32.3393	64.9478	37.2826	20.9551	13.6965	7.25861
	442.283	1800	177.759	1.0241	2.68725	29.5164	34.0497	20.0556	30.1836	553.645	451.78	0	225.492	1.7135	2.68601	605.014	443.68	0.9611	70.9294	0	118.406	122.987	18.9788	11.7789	36.0856	11.6509	14.2072	2.55627
	442.283	3333	177.759	1.0241	2.68725	29.5164	34.0497	20.0556	30.1836	553.645	451.78	0	225.492	1.7135	2.68601	605.014	443.68	0.9611	70.9294	0	118.406	120.989	10.7028	0.13867	35.2026	6.43484	6.70912	0.274281
	442.283	6666	177.759	1.0241	2.68725	29.5164	34.0497	20.0556	30.1836	553.645	451.78	0	225.492	1.7135	2.68601	605.014	443.68	0.9611	70.9294	0	118.406	119.749	5.56291	-1.14668	34.6311	3.32428	3.08442	0.239858
	442.283	10000	177.759	1.0241	2.68725	29.5164	34.0497	20.0556	30.1836	553.645	451.78	0	225.492	1.7135	2.68601	605.014	443.68	0.9611	70.9294	0	118.406	119.319	3.78251	-0.94061	34.4359	2.2587	1.59985	0.658853
	442.283	21000	177.759	1.0241	2.68725	29.5164	34.0497	20.0556	30.1836	553.645	451.78	0	225.492	1.7135	2.68601	605.014	443.68	0.9611	70.9294	0	118.406	118.855	1.86203	-0.503516	34.2312	1.11211	0.58681	0.5253
	442.283	33000	177.759	1.0241	2.68725	29.5164	34.0497	20.0556	30.1836	553.645	451.78	0	225.492	1.7135	2.68601	605.014	443.68	0.9611	70.9294	0	118.406	118.698	1.20773	-0.325684	34.1641	0.721605	0.76632	0.0447148
	442.283	100000	177.759	1.0241	2.68725	29.5164	34.0497	20.0556	30.1836	553.645	451.78	0	225.492	1.7135	2.68601	605.014	443.68	0.9611	70.9294	0	118.406	118.507	0.41686	-0.10677	34.0865	0.249308	0.26292	0.013612
																												152.588
	442.283	50000	177.759	1.0241	2.68725	29.5164	34.0497	20.0556	30.1836	553.645	451.78	0	225.492	1.7135	2.68601	605.014	443.68	0.9611	70.9294	0	118.406	118.602	0.810819	-0.215366	34.1245	0.484636
	442.283	45000	177.759	1.0241	2.68725	29.5164	34.0497	20.0556	30.1836	553.645	451.78	0	225.492	1.7135	2.68601	605.014	443.68	0.9611	70.9294	0	118.406	118.623	0.897051	-0.239354	34.133	0.536127
	442.283	40500	177.759	1.0241	2.68725	29.5164	34.0497	20.0556	30.1836	553.645	451.78	0	225.492	1.7135	2.68601	605.014	443.68	0.9611	70.9294	0	118.406	118.646	0.992432	-0.265898	34.1425	0.593076
	442.283	36450	177.759	1.0241	2.68725	29.5164	34.0497	20.0556	30.1836	553.645	451.78	0	225.492	1.7135	2.68601	605.014	443.68	0.9611	70.9294	0	118.406	118.671	1.09793	-0.295229	34.153	0.656059
	442.283	32805	177.759	1.0241	2.68725	29.5164	34.0497	20.0556	30.1836	553.645	451.78	0	225.492	1.7135	2.68601	605.014	443.68	0.9611	70.9294	0	118.406	118.699	1.21461	-0.327589	34.1648	0.725712
	442.283	29524.5	177.759	1.0241	2.68725	29.5164	34.0497	20.0556	30.1836	553.645	451.78	0	225.492	1.7135	2.68601	605.014	443.68	0.9611	70.9294	0	118.406	118.73	1.34366	-0.363219	34.1779	0.802738
	442.283	26572	177.759	1.0241	2.68725	29.5164	34.0497	20.0556	30.1836	553.645	451.78	0	225.492	1.7135	2.68601	605.014	443.68	0.9611	70.9294	0	118.406	118.765	1.48637	-0.402358	34.1925	0.887914
	442.283	23914.8	177.759	1.0241	2.68725	29.5164	34.0497	20.0556	30.1836	553.645	451.78	0	225.492	1.7135	2.68601	605.014	443.68	0.9611	70.9294	0	118.406	118.803	1.64418	-0.445225	34.2087	0.982098
	442.283	21523.4	177.759	1.0241	2.68725	29.5164	34.0497	20.0556	30.1836	553.645	451.78	0	225.492	1.7135	2.68601	605.014	443.68	0.9611	70.9294	0	118.406	118.845	1.81867	-0.492006	34.2267	1.08623
	442.283	19371	177.759	1.0241	2.68725	29.5164	34.0497	20.0556	30.1836	553.645	451.78	0	225.492	1.7135	2.68601	605.014	443.68	0.9611	70.9294	0	118.406	118.892	2.0116	-0.542832	34.2468	1.20137
	442.283	17433.9	177.759	1.0241	2.68725	29.5164	34.0497	20.0556	30.1836	553.645	451.78	0	225.492	1.7135	2.68601	605.014	443.68	0.9611	70.9294	0	118.406	118.943	2.2249	-0.597743	34.2692	1.32866
	442.283	15690.5	177.759	1.0241	2.68725	29.5164	34.0497	20.0556	30.1836	553.645	451.78	0	225.492	1.7135	2.68601	605.014	443.68	0.9611	70.9294	0	118.406	119	2.46068	-0.656651	34.294	1.46938
	442.283	14121.5	177.759	1.0241	2.68725	29.5164	34.0497	20.0556	30.1836	553.645	451.78	0	225.492	1.7135	2.68601	605.014	443.68	0.9611	70.9294	0	118.406	119.063	2.7213	-0.719271	34.3217	1.62494
	442.283	12709.3	177.759	1.0241	2.68725	29.5164	34.0497	20.0556	30.1836	553.645	451.78	0	225.492	1.7135	2.68601	605.014	443.68	0.9611	70.9294	0	118.406	119.132	3.00933	-0.785049	34.3524	1.79689
	442.283	11438.4	177.759	1.0241	2.68725	29.5164	34.0497	20.0556	30.1836	553.645	451.78	0	225.492	1.7135	2.68601	605.014	443.68	0.9611	70.9294	0	118.406	119.209	3.32762	-0.853049	34.3866	1.98696
	442.283	10294.6	177.759	1.0241	2.68725	29.5164	34.0497	20.0556	30.1836	553.645	451.78	0	225.492	1.7135	2.68601	605.014	443.68	0.9611	70.9294	0	118.406	119.294	3.6793	-0.921804	34.4247	2.19703
	442.283	9265.1	177.759	1.0241	2.68725	29.5164	34.0497	20.0556	30.1836	553.645	451.78	0	225.492	1.7135	2.68601	605.014	443.68	0.9611	70.9294	0	118.406	119.388	4.06779	-0.989121	34.4669	2.42921
	442.283	8338.59	177.759	1.0241	2.68725	29.5164	34.0497	20.0556	30.1836	553.645	451.78	0	225.492	1.7135	2.68601	605.014	443.68	0.9611	70.9294	0	118.406	119.491	4.49689	-1.05182	34.5138	2.68582
	442.283	7504.73	177.759	1.0241	2.68725	29.5164	34.0497	20.0556	30.1836	553.645	451.78	0	225.492	1.7135	2.68601	605.014	443.68	0.9611	70.9294	0	118.406	119.606	4.97074	-1.10536	34.5658	2.96944
	442.283	6754.26	177.759	1.0241	2.68725	29.5164	34.0497	20.0556	30.1836	553.645	451.78	0	225.492	1.7135	2.68601	605.014	443.68	0.9611	70.9294	0	118.406	119.732	5.49389	-1.14342	34.6235	3.2829
	442.283	6078.83	177.759	1.0241	2.68725	29.5164	34.0497	20.0556	30.1836	553.645	451.78	0	225.492	1.7135	2.68601	605.014	443.68	0.9611	70.9294	0	118.406	119.871	6.07135	-1.15721	34.6874	3.62937
	442.283	5470.95	177.759	1.0241	2.68725	29.5164	34.0497	20.0556	30.1836	553.645	451.78	0	225.492	1.7135	2.68601	605.014	443.68	0.9611	70.9294	0	118.406	120.025	6.70856	-1.13472	34.7582	4.01236
	442.283	4923.85	177.759	1.0241	2.68725	29.5164	34.0497	20.0556	30.1836	553.645	451.78	0	225.492	1.7135	2.68601	605.014	443.68	0.9611	70.9294	0	118.406	120.195	7.41153	-1.05955	34.8364	4.43579
	442.283	4431.47	177.759	1.0241	2.68725	29.5164	34.0497	20.0556	30.1836	553.645	451.78	0	225.492	1.7135	2.68601	605.014	443.68	0.9611	70.9294	0	118.406	120.382	8.18678	-0.909593	34.9228	4.90402
	442.283	3988.32	177.759	1.0241	2.68725	29.5164	34.0497	20.0556	30.1836	553.645	451.78	0	225.492	1.7135	2.68601	605.014	443.68	0.9611	70.9294	0	118.406	120.588	9.04144	-0.655096	35.018	5.42197
	442.283	3589.49	177.759	1.0241	2.68725	29.5164	34.0497	20.0556	30.1836	553.645	451.78	0	225.492	1.7135	2.68601	605.014	443.68	0.9611	70.9294	0	118.406	120.816	9.98327	-0.256315	35.1228	5.99512
	442.283	3230.54	177.759	1.0241	2.68725	29.5164	34.0497	20.0556	30.1836	553.645	451.78	0	225.492	1.7135	2.68601	605.014	443.68	0.9611	70.9294	0	118.406	121.066	11.0207	0.339565	35.2377	6.6297
	442.283	2907.49	177.759	1.0241	2.68725	29.5164	34.0497	20.0556	30.1836	553.645	451.78	0	225.492	1.7135	2.68601	605.014	443.68	0.9611	70.9294	0	118.406	121.342	12.163	1.20229	35.3636	7.33277
	442.283	2616.74	177.759	1.0241	2.68725	29.5164	34.0497	20.0556	30.1836	553.645	451.78	0	225.492	1.7135	2.68601	605.014	443.68	0.9611	70.9294	0	118.406	121.645	13.4199	2.42333	35.5008	8.11236
	442.283	2355.06	177.759	1.0241	2.68725	29.5164	34.0497	20.0556	30.1836	553.645	451.78	0	225.492	1.7135	2.68601	605.014	443.68	0.9611	70.9294	0	118.406	121.979	14.8023	4.12159	35.65	8.97769
	442.283	2119.56	177.759	1.0241	2.68725	29.5164	34.0497	20.0556	30.1836	553.645	451.78	0	225.492	1.7135	2.68601	605.014	443.68	0.9611	70.9294	0	118.406	122.345	16.3217	6.45011	35.8113	9.93938
	442.283	1907.6	177.759	1.0241	2.68725	29.5164	34.0497	20.0556	30.1836	553.645	451.78	0	225.492	1.7135	2.68601	605.014	443.68	0.9611	70.9294	0	118.406	122.748	17.9906	9.60311	35.9848	11.0097
	442.283	1716.84	177.759	1.0241	2.68725	29.5164	34.0497	20.0556	30.1836	553.645	451.78	0	225.492	1.7135	2.68601	605.014	443.68	0.9611	70.9294	0	118.406	123.19	19.8221	13.8228	36.1703	12.2027
	442.283	1545.16	177.759	1.0241	2.68725	29.5164	34.0497	20.0556	30.1836	553.645	451.78	0	225.492	1.7135	2.68601	605.014	443.68	0.9611	70.9294	0	118.406	123.675	21.8305	19.4041	36.3672	13.535
	442.283	1390.64	177.759	1.0241	2.68725	29.5164	34.0497	20.0556	30.1836	553.645	451.78	0	225.492	1.7135	2.68601	605.014	443.68	0.9611	70.9294	0	118.406	124.206	24.0309	26.6946	36.5747	15.0251
	442.283	1251.58	177.759	1.0241	2.68725	29.5164	34.0497	20.0556	30.1836	553.645	451.78	0	225.492	1.7135	2.68601	605.014	443.68	0.9611	70.9294	0	118.406	124.787	26.4392	36.0857	36.7918	16.6943
	442.283	1126.42	177.759	1.0241	2.68725	29.5164	34.0497	20.0556	30.1836	553.645	451.78	0	225.492	1.7135	2.68601	605.014	443.68	0.9611	70.9294	0	118.406	125.423	29.0721	47.9894	37.0176	18.5659
	442.283	1013.78	177.759	1.0241	2.68725	29.5164	34.0497	20.0556	30.1836	553.645	451.78	0	225.492	1.7135	2.68601	605.014	443.68	0.9611	70.9294	0	118.406	126.117	31.9472	62.7948	37.2516	20.6646
	442.283	912.4	177.759	1.0241	2.68725	29.5164	34.0497	20.0556	30.1836	553.645	451.78	0	225.492	1.7135	2.68601	605.014	443.68	0.9611	70.9294	0	118.406	126.873	35.0825	80.8017	37.4946	23.0145
	442.283	821.16	177.759	1.0241	2.68725	29.5164	34.0497	20.0556	30.1836	553.645	451.78	0	225.492	1.7135	2.68601	605.014	443.68	0.9611	70.9294	0	118.406	127.698	38.4967	102.134	37.7495	25.6366
	442.283	739.044	177.759	1.0241	2.68725	29.5164	34.0497	20.0556	30.1836	553.645	451.78	0	225.492	1.7135	2.68601	605.014	443.68	0.9611	70.9294	0	118.406	128.593	42.2089	126.647	38.0222	28.5453
	442.283	665.14	177.759	1.0241	2.68725	29.5164	34.0497	20.0556	30.1836	553.645	451.78	0	225.492	1.7135	2.68601	605.014	443.68	0.9611	70.9294	0	118.406	129.566	46.2382	153.855	38.3224	31.744
	442.283	598.626	177.759	1.0241	2.68725	29.5164	34.0497	20.0556	30.1836	553.645	451.78	0	225.492	1.7135	2.68601	605.014	443.68	0.9611	70.9294	0	118.406	130.62	50.6036	182.92	38.6638	35.222
	442.283	538.763	177.759	1.0241	2.68725	29.5164	34.0497	20.0556	30.1836	553.645	451.78	0	225.492	1.7135	2.68601	605.014	443.68	0.9611	70.9294	0	118.406	131.759	55.3238	212.713	39.0632	38.9539
	442.283	484.887	177.759	1.0241	2.68725	29.5164	34.0497	20.0556	30.1836	553.645	451.78	0	225.492	1.7135	2.68601	605.014	443.68	0.9611	70.9294	0	118.406	132.988	60.4167	241.965	39.5392	42.9021
	442.283	436.398	177.759	1.0241	2.68725	29.5164	34.0497	20.0556	30.1836	553.645	451.78	0	225.492	1.7135	2.68601	605.014	443.68	0.9611	70.9294	0	118.406	134.311	65.8988	269.458	40.1105	47.0229
	442.283	392.758	177.759	1.0241	2.68725	29.5164	34.0497	20.0556	30.1836	553.645	451.78	0	225.492	1.7135	2.68601	605.014	443.68	0.9611	70.9294	0	118.406	135.732	71.7852	294.194	40.7936	51.2734
	442.283	353.483	177.759	1.0241	2.68725	29.5164	34.0497	20.0556	30.1836	553.645	451.78	0	225.492	1.7135	2.68601	605.014	443.68	0.9611	70.9294	0	118.406	137.253	78.0887	315.51	41.6022	55.6183
	442.283	318.134	177.759	1.0241	2.68725	29.5164	34.0497	20.0556	30.1836	553.645	451.78	0	225.492	1.7135	2.68601	605.014	443.68	0.9611	70.9294	0	118.406	138.878	84.8194	333.094	42.5464	60.0325
	442.283	286.321	177.759	1.0241	2.68725	29.5164	34.0497	20.0556	30.1836	553.645	451.78	0	225.492	1.7135	2.68601	605.014	443.68	0.9611	70.9294	0	118.406	140.607	91.9844	346.943	43.6339	64.502
	442.283	257.689	177.759	1.0241	2.68725	29.5164	34.0497	20.0556	30.1836	553.645	451.78	0	225.492	1.7135	2.68601	605.014	443.68	0.9611	70.9294	0	118.406	142.442	99.5866	357.272	44.8699	69.0204
	442.283	231.92	177.759	1.0241	2.68725	29.5164	34.0497	20.0556	30.1836	553.645	451.78	0	225.492	1.7135	2.68601	605.014	443.68	0.9611	70.9294	0	118.406	144.382	107.625	364.426	46.2584	73.5861
	442.283	208.728	177.759	1.0241	2.68725	29.5164	34.0497	20.0556	30.1836	553.645	451.78	0	225.492	1.7135	2.68601	605.014	443.68	0.9611	70.9294	0	118.406	146.426	116.093	368.8	47.803	78.1986
	442.283	187.855	177.759	1.0241	2.68725	29.5164	34.0497	20.0556	30.1836	553.645	451.78	0	225.492	1.7135	2.68601	605.014	443.68	0.9611	70.9294	0	118.406	148.571	124.98	370.787	49.5067	82.8559
	442.283	169.07	177.759	1.0241	2.68725	29.5164	34.0497	20.0556	30.1836	553.645	451.78	0	225.492	1.7135	2.68601	605.014	443.68	0.9611	70.9294	0	118.406	150.813	134.268	370.746	51.3726	87.5527
	442.283	152.163	177.759	1.0241	2.68725	29.5164	34.0497	20.0556	30.1836	553.645	451.78	0	225.492	1.7135	2.68601	605.014	443.68	0.9611	70.9294	0	118.406	153.146	143.934	368.988	53.4037	92.2801
	442.283	136.946	177.759	1.0241	2.68725	29.5164	34.0497	20.0556	30.1836	553.645	451.78	0	225.492	1.7135	2.68601	605.014	443.68	0.9611	70.9294	0	118.406	155.563	153.951	365.771	55.6025	97.0252
	442.283	123.252	177.759	1.0241	2.68725	29.5164	34.0497	20.0556	30.1836	553.645	451.78	0	225.492	1.7135	2.68601	605.014	443.68	0.9611	70.9294	0	118.406	158.057	164.282	361.306	57.971	101.772
	442.283	110.927	177.759	1.0241	2.68725	29.5164	34.0497	20.0556	30.1836	553.645	451.78	0	225.492	1.7135	2.68601	605.014	443.68	0.9611	70.9294	0	118.406	160.617	174.888	355.762	60.5103	106.501
	442.283	99.8339	177.759	1.0241	2.68725	29.5164	34.0497	20.0556	30.1836	553.645	451.78	0	225.492	1.7135	2.68601	605.014	443.68	0.9611	70.9294	0	118.406	163.232	185.724	349.275	63.22	111.193
	442.283	89.8505	177.759	1.0241	2.68725	29.5164	34.0497	20.0556	30.1836	553.645	451.78	0	225.492	1.7135	2.68601	605.014	443.68	0.9611	70.9294	0	118.406	165.891	196.74	341.957	66.0985	115.826
	442.283	80.8655	177.759	1.0241	2.68725	29.5164	34.0497	20.0556	30.1836	553.645	451.78	0	225.492	1.7135	2.68601	605.014	443.68	0.9611	70.9294	0	118.406	168.58	207.882	333.899	69.142	120.38
	442.283	72.7789	177.759	1.0241	2.68725	29.5164	34.0497	20.0556	30.1836	553.645	451.78	0	225.492	1.7135	2.68601	605.014	443.68	0.9611	70.9294	0	118.406	171.287	219.096	325.181	72.3446	124.835
	442.283	65.501	177.759	1.0241	2.68725	29.5164	34.0497	20.0556	30.1836	553.645	451.78	0	225.492	1.7135	2.68601	605.014	443.68	0.9611	70.9294	0	118.406	173.996	230.323	315.874	75.6983	129.173
	442.283	58.9509	177.759	1.0241	2.68725	29.5164	34.0497	20.0556	30.1836	553.645	451.78	0	225.492	1.7135	2.68601	605.014	443.68	0.9611	70.9294	0	118.406	176.696	241.508	306.045	79.1926	133.38
	442.283	53.0558	177.759	1.0241	2.68725	29.5164	34.0497	20.0556	30.1836	553.645	451.78	0	225.492	1.7135	2.68601	605.014	443.68	0.9611	70.9294	0	118.406	179.371	252.592	295.759	82.8144	137.444
	442.283	47.7502	177.759	1.0241	2.68725	29.5164	34.0497	20.0556	30.1836	553.645	451.78	0	225.492	1.7135	2.68601	605.014	443.68	0.9611	70.9294	0	118.406	182.009	263.522	285.082	86.5484	141.354
	442.283	42.9752	177.759	1.0241	2.68725	29.5164	34.0497	20.0556	30.1836	553.645	451.78	0	225.492	1.7135	2.68601	605.014	443.68	0.9611	70.9294	0	118.406	184.598	274.247	274.082	90.3769	145.106
	442.283	38.6777	177.759	1.0241	2.68725	29.5164	34.0497	20.0556	30.1836	553.645	451.78	0	225.492	1.7135	2.68601	605.014	443.68	0.9611	70.9294	0	118.406	187.125	284.718	262.826	94.2804	148.696
	442.283	34.8099	177.759	1.0241	2.68725	29.5164	34.0497	20.0556	30.1836	553.645	451.78	0	225.492	1.7135	2.68601	605.014	443.68	0.9611	70.9294	0	118.406	189.581	294.892	251.386	98.2377	152.123
	442.283	31.3289	177.759	1.0241	2.68725	29.5164	34.0497	20.0556	30.1836	553.645	451.78	0	225.492	1.7135	2.68601	605.014	443.68	0.9611	70.9294	0	118.406	191.956	304.734	239.833	102.226	155.388
	442.283	28.196	177.759	1.0241	2.68725	29.5164	34.0497	20.0556	30.1836	553.645	451.78	0	225.492	1.7135	2.68601	605.014	443.68	0.9611	70.9294	0	118.406	194.243	314.21	228.24	106.224	158.494
	442.283	25.3764	177.759	1.0241	2.68725	29.5164	34.0497	20.0556	30.1836	553.645	451.78	0	225.492	1.7135	2.68601	605.014	443.68	0.9611	70.9294	0	118.406	196.436	323.296	216.679	110.206	161.445
	442.283	22.8388	177.759	1.0241	2.68725	29.5164	34.0497	20.0556	30.1836	553.645	451.78	0	225.492	1.7135	2.68601	605.014	443.68	0.9611	70.9294	0	118.406	198.53	331.97	205.219	114.15	164.246
	442.283	20.5549	177.759	1.0241	2.68725	29.5164	34.0497	20.0556	30.1836	553.645	451.78	0	225.492	1.7135	2.68601	605.014	443.68	0.9611	70.9294	0	118.406	200.521	340.219	193.926	118.035	166.902
	442.283	18.4994	177.759	1.0241	2.68725	29.5164	34.0497	20.0556	30.1836	553.645	451.78	0	225.492	1.7135	2.68601	605.014	443.68	0.9611	70.9294	0	118.406	202.407	348.035	182.863	121.839	169.416
	442.283	16.6495	177.759	1.0241	2.68725	29.5164	34.0497	20.0556	30.1836	553.645	451.78	0	225.492	1.7135	2.68601	605.014	443.68	0.9611	70.9294	0	118.406	204.188	355.414	172.085	125.544	171.796
	442.283	14.9845	177.759	1.0241	2.68725	29.5164	34.0497	20.0556	30.1836	553.645	451.78	0	225.492	1.7135	2.68601	605.014	443.68	0.9611	70.9294	0	118.406	205.863	362.356	161.642	129.133	174.044
	442.283	13.4861	177.759	1.0241	2.68725	29.5164	34.0497	20.0556	30.1836	553.645	451.78	0	225.492	1.7135	2.68601	605.014	443.68	0.9611	70.9294	0	118.406	207.435	368.867	151.578	132.591	176.166
	442.283	12.1375	177.759	1.0241	2.68725	29.5164	34.0497	20.0556	30.1836	553.645	451.78	0	225.492	1.7135	2.68601	605.014	443.68	0.9611	70.9294	0	118.406	208.905	374.956	141.927	135.907	178.166
	442.283	10.9237	177.759	1.0241	2.68725	29.5164	34.0497	20.0556	30.1836	553.645	451.78	0	225.492	1.7135	2.68601	605.014	443.68	0.9611	70.9294	0	118.406	210.275	380.634	132.717	139.07	180.048
	442.283	9.83135	177.759	1.0241	2.68725	29.5164	34.0497	20.0556	30.1836	553.645	451.78	0	225.492	1.7135	2.68601	605.014	443.68	0.9611	70.9294	0	118.406	211.55	385.915	123.97	142.075	181.815
	442.283	8.84822	177.759	1.0241	2.68725	29.5164	34.0497	20.0556	30.1836	553.645	451.78	0	225.492	1.7135	2.68601	605.014	443.68	0.9611	70.9294	0	118.406	212.732	390.815	115.698	144.916	183.472
	442.283	7.9634	177.759	1.0241	2.68725	29.5164	34.0497	20.0556	30.1836	553.645	451.78	0	225.492	1.7135	2.68601	605.014	443.68	0.9611	70.9294	0	118.406	213.827	395.352	107.907	147.592	185.021
	442.283	7.16706	177.759	1.0241	2.68725	29.5164	34.0497	20.0556	30.1836	553.645	451.78	0	225.492	1.7135	2.68601	605.014	443.68	0.9611	70.9294	0	118.406	214.839	399.543	100.599	150.102	186.468
	442.283	6.45035	177.759	1.0241	2.68725	29.5164	34.0497	20.0556	30.1836	553.645	451.78	0	225.492	1.7135	2.68601	605.014	443.68	0.9611	70.9294	0	118.406	215.772	403.407	93.7677	152.448	187.817
	442.283	5.80532	177.759	1.0241	2.68725	29.5164	34.0497	20.0556	30.1836	553.645	451.78	0	225.492	1.7135	2.68601	605.014	443.68	0.9611	70.9294	0	118.406	216.63	406.965	87.4049	154.633	189.07
	442.283	5.22478	177.759	1.0241	2.68725	29.5164	34.0497	20.0556	30.1836	553.645	451.78	0	225.492	1.7135	2.68601	605.014	443.68	0.9611	70.9294	0	118.406	217.419	410.234	81.497	156.661	190.233
	442.283	4.70231	177.759	1.0241	2.68725	29.5164	34.0497	20.0556	30.1836	553.645	451.78	0	225.492	1.7135	2.68601	605.014	443.68	0.9611	70.9294	0	118.406	218.143	413.234	76.0277	158.54	191.31
	442.283	4.23207	177.759	1.0241	2.68725	29.5164	34.0497	20.0556	30.1836	553.645	451.78	0	225.492	1.7135	2.68601	605.014	443.68	0.9611	70.9294	0	118.406	218.807	415.983	70.9782	160.273	192.305
	442.283	3.80887	177.759	1.0241	2.68725	29.5164	34.0497	20.0556	30.1836	553.645	451.78	0	225.492	1.7135	2.68601	605.014	443.68	0.9611	70.9294	0	118.406	219.414	418.499	66.3281	161.87	193.224
	442.283	3.42798	177.759	1.0241	2.68725	29.5164	34.0497	20.0556	30.1836	553.645	451.78	0	225.492	1.7135	2.68601	605.014	443.68	0.9611	70.9294	0	118.406	219.969	420.799	62.0558	163.337	194.069
	442.283	3.08518	177.759	1.0241	2.68725	29.5164	34.0497	20.0556	30.1836	553.645	451.78	0	225.492	1.7135	2.68601	605.014	443.68	0.9611	70.9294	0	118.406	220.476	422.899	58.139	164.682	194.846
	442.283	2.77666	177.759	1.0241	2.68725	29.5164	34.0497	20.0556	30.1836	553.645	451.78	0	225.492	1.7135	2.68601	605.014	443.68	0.9611	70.9294	0	118.406	220.939	424.815	54.555	165.913	195.559
	442.283	2.499	177.759	1.0241	2.68725	29.5164	34.0497	20.0556	30.1836	553.645	451.78	0	225.492	1.7135	2.68601	605.014	443.68	0.9611	70.9294	0	118.406	221.36	426.562	51.2816	167.037	196.213
	442.283	2.2491	177.759	1.0241	2.68725	29.5164	34.0497	20.0556	30.1836	553.645	451.78	0	225.492	1.7135	2.68601	605.014	443.68	0.9611	70.9294	0	118.406	221.744	428.153	48.2967	168.062	196.811
	442.283	2.02419	177.759	1.0241	2.68725	29.5164	34.0497	20.0556	30.1836	553.645	451.78	0	225.492	1.7135	2.68601	605.014	443.68	0.9611	70.9294	0	118.406	222.094	429.601	45.579	168.995	197.358
	442.283	1.82177	177.759	1.0241	2.68725	29.5164	34.0497	20.0556	30.1836	553.645	451.78	0	225.492	1.7135	2.68601	605.014	443.68	0.9611	70.9294	0	118.406	222.411	430.917	43.1078	169.844	197.857
	442.283	1.63959	177.759	1.0241	2.68725	29.5164	34.0497	20.0556	30.1836	553.645	451.78	0	225.492	1.7135	2.68601	605.014	443.68	0.9611	70.9294	0	118.406	222.7	432.115	40.8636	170.614	198.312
	442.283	1.47563	177.759	1.0241	2.68725	29.5164	34.0497	20.0556	30.1836	553.645	451.78	0	225.492	1.7135	2.68601	605.014	443.68	0.9611	70.9294	0	118.406	222.963	433.202	38.8279	171.313	198.726
	442.283	1.32807	177.759	1.0241	2.68725	29.5164	34.0497	20.0556	30.1836	553.645	451.78	0	225.492	1.7135	2.68601	605.014	443.68	0.9611	70.9294	0	118.406	223.201	434.189	36.9831	171.947	199.104
	442.283	1.19526	177.759	1.0241	2.68725	29.5164	34.0497	20.0556	30.1836	553.645	451.78	0	225.492	1.7135	2.68601	605.014	443.68	0.9611	70.9294	0	118.406	223.417	435.086	35.3129	172.52	199.447
	442.283	1.07574	177.759	1.0241	2.68725	29.5164	34.0497	20.0556	30.1836	553.645	451.78	0	225.492	1.7135	2.68601	605.014	443.68	0.9611	70.9294	0	118.406	223.614	435.899	33.8021	173.039	199.759
	442.283	0.968163	177.759	1.0241	2.68725	29.5164	34.0497	20.0556	30.1836	553.645	451.78	0	225.492	1.7135	2.68601	605.014	443.68	0.9611	70.9294	0	118.406	223.792	436.636	32.4364	173.508	200.042
	442.283	0.871347	177.759	1.0241	2.68725	29.5164	34.0497	20.0556	30.1836	553.645	451.78	0	225.492	1.7135	2.68601	605.014	443.68	0.9611	70.9294	0	118.406	223.953	437.305	31.2027	173.932	200.299
	442.283	0.784212	177.759	1.0241	2.68725	29.5164	34.0497	20.0556	30.1836	553.645	451.78	0	225.492	1.7135	2.68601	605.014	443.68	0.9611	70.9294	0	118.406	224.099	437.911	30.0891	174.314	200.532
	442.283	0.705791	177.759	1.0241	2.68725	29.5164	34.0497	20.0556	30.1836	553.645	451.78	0	225.492	1.7135	2.68601	605.014	443.68	0.9611	70.9294	0	118.406	224.232	438.46	29.0843	174.659	200.744
	442.283	0.635212	177.759	1.0241	2.68725	29.5164	34.0497	20.0556	30.1836	553.645	451.78	0	225.492	1.7135	2.68601	605.014	443.68	0.9611	70.9294	0	118.406	224.352	438.957	28.1782	174.97	200.935
	442.283	0.571691	177.759	1.0241	2.68725	29.5164	34.0497	20.0556	30.1836	553.645	451.78	0	225.492	1.7135	2.68601	605.014	443.68	0.9611	70.9294	0	118.406	224.46	439.408	27.3615	175.251	201.109
	442.283	0.514522	177.759	1.0241	2.68725	29.5164	34.0497	20.0556	30.1836	553.645	451.78	0	225.492	1.7135	2.68601	605.014	443.68	0.9611	70.9294	0	118.406	224.559	439.815	26.6256	175.503	201.266
	442.283	0.463069	177.759	1.0241	2.68725	29.5164	34.0497	20.0556	30.1836	553.645	451.78	0	225.492	1.7135	2.68601	605.014	443.68	0.9611	70.9294	0	118.406	224.648	440.185	25.9628	175.731	201.408
	442.283	0.416762	177.759	1.0241	2.68725	29.5164	34.0497	20.0556	30.1836	553.645	451.78	0	225.492	1.7135	2.68601	605.014	443.68	0.9611	70.9294	0	118.406	224.729	440.519	25.366	175.936	201.537
	442.283	0.375086	177.759	1.0241	2.68725	29.5164	34.0497	20.0556	30.1836	553.645	451.78	0	225.492	1.7135	2.68601	605.014	443.68	0.9611	70.9294	0	118.406	224.802	440.821	24.8289	176.12	201.654
	442.283	0.337578	177.759	1.0241	2.68725	29.5164	34.0497	20.0556	30.1836	553.645	451.78	0	225.492	1.7135	2.68601	605.014	443.68	0.9611	70.9294	0	118.406	224.868	441.095	24.3455	176.286	201.759
	442.283	0.30382	177.759	1.0241	2.68725	29.5164	34.0497	20.0556	30.1836	553.645	451.78	0	225.492	1.7135	2.68601	605.014	443.68	0.9611	70.9294	0	118.406	224.928	441.343	23.9106	176.436	201.854
	442.283	0.273438	177.759	1.0241	2.68725	29.5164	34.0497	20.0556	30.1836	553.645	451.78	0	225.492	1.7135	2.68601	605.014	443.68	0.9611	70.9294	0	118.406	224.982	441.567	23.5195	176.57	201.94
	442.283	0.246094	177.759	1.0241	2.68725	29.5164	34.0497	20.0556	30.1836	553.645	451.78	0	225.492	1.7135	2.68601	605.014	443.68	0.9611	70.9294	0	118.406	225.03	441.769	23.1678	176.691	202.018
	442.283	0.221485	177.759	1.0241	2.68725	29.5164	34.0497	20.0556	30.1836	553.645	451.78	0	225.492	1.7135	2.68601	605.014	443.68	0.9611	70.9294	0	118.406	225.075	441.952	22.8515	176.799	202.089
	442.283	0.199336	177.759	1.0241	2.68725	29.5164	34.0497	20.0556	30.1836	553.645	451.78	0	225.492	1.7135	2.68601	605.014	443.68	0.9611	70.9294	0	118.406	225.115	442.118	22.5672	176.897	202.152
	442.283	0.179403	177.759	1.0241	2.68725	29.5164	34.0497	20.0556	30.1836	553.645	451.78	0	225.492	1.7135	2.68601	605.014	443.68	0.9611	70.9294	0	118.406	225.151	442.268	22.3117	176.985	202.21
	442.283	0.161462	177.759	1.0241	2.68725	29.5164	34.0497	20.0556	30.1836	553.645	451.78	0	225.492	1.7135	2.68601	605.014	443.68	0.9611	70.9294	0	118.406	225.184	442.404	22.082	177.063	202.262
	442.283	0.145316	177.759	1.0241	2.68725	29.5164	34.0497	20.0556	30.1836	553.645	451.78	0	225.492	1.7135	2.68601	605.014	443.68	0.9611	70.9294	0	118.406	225.213	442.526	21.8756	177.134	202.309
	442.283	0.130784	177.759	1.0241	2.68725	29.5164	34.0497	20.0556	30.1836	553.645	451.78	0	225.492	1.7135	2.68601	605.014	443.68	0.9611	70.9294	0	118.406	225.24	442.637	21.6902	177.198	202.351
	442.283	0.117706	177.759	1.0241	2.68725	29.5164	34.0497	20.0556	30.1836	553.645	451.78	0	225.492	1.7135	2.68601	605.014	443.68	0.9611	70.9294	0	118.406	225.264	442.737	21.5235	177.255	202.389

## Sheet: s250 (2)
			K1	Hilli1 x	Hill2 x	K1is	K1ii	V1	Kx1	Kx2	V1is	V1ii	K2	Hill1	Hill2	K3	V2	Hill xx	Kxx1	V2i	K2i
		42.2831	177.759	1.0241	2.68725	29.5164	34.0497	20.0556	30.1836	553.645	451.78	0	225.492	1.7135	2.68601	605.014	443.68	0.9611	70.9294	0	118.406
	S	I	K1	Hilli1 x	Hill2 x	K1is	K1ii	V1	Kx1	Kx2	V1is	V1ii	K2	Hill1	Hill2	K3	V2	Hill xx	Kxx1	V2i	K2i	K2 term	V2 term	V1 term	K1 term	cal	obs
42.2831	292.283	0.01	177.759	1.0241	2.68725	29.5164	34.0497	20.0556	30.1836	553.645	451.78	0	225.492	1.7135	2.68601	605.014	443.68	0.9611	70.9294	0	118.406	225.47	443.591	20.1735	177.719	215.518	229.948	14.4301
	292.283	0.06	177.759	1.0241	2.68725	29.5164	34.0497	20.0556	30.1836	553.645	451.78	0	225.492	1.7135	2.68601	605.014	443.68	0.9611	70.9294	0	118.406	225.372	443.186	20.7931	177.506	215.41	229.926	14.5162
	292.283	0.33	177.759	1.0241	2.68725	29.5164	34.0497	20.0556	30.1836	553.645	451.78	0	225.492	1.7135	2.68601	605.014	443.68	0.9611	70.9294	0	118.406	224.881	441.15	24.2479	176.32	214.874	229.3	14.4258
	292.283	1	177.759	1.0241	2.68725	29.5164	34.0497	20.0556	30.1836	553.645	451.78	0	225.492	1.7135	2.68601	605.014	443.68	0.9611	70.9294	0	118.406	223.739	436.417	32.8411	173.369	213.653	229.605	15.9524
	292.283	3.33	177.759	1.0241	2.68725	29.5164	34.0497	20.0556	30.1836	553.645	451.78	0	225.492	1.7135	2.68601	605.014	443.68	0.9611	70.9294	0	118.406	220.113	421.396	60.9432	163.719	209.939	226.765	16.8264
	292.283	6.66	177.759	1.0241	2.68725	29.5164	34.0497	20.0556	30.1836	553.645	451.78	0	225.492	1.7135	2.68601	605.014	443.68	0.9611	70.9294	0	118.406	215.496	402.268	95.7914	151.753	205.498	229.132	23.6338
	292.283	10	177.759	1.0241	2.68725	29.5164	34.0497	20.0556	30.1836	553.645	451.78	0	225.492	1.7135	2.68601	605.014	443.68	0.9611	70.9294	0	118.406	211.35	385.089	125.35	141.601	201.693	209.377	7.68372
	292.283	21	177.759	1.0241	2.68725	29.5164	34.0497	20.0556	30.1836	553.645	451.78	0	225.492	1.7135	2.68601	605.014	443.68	0.9611	70.9294	0	118.406	200.124	338.577	196.206	117.251	191.522	189.702	1.82001
	292.283	33.3	177.759	1.0241	2.68725	29.5164	34.0497	20.0556	30.1836	553.645	451.78	0	225.492	1.7135	2.68601	605.014	443.68	0.9611	70.9294	0	118.406	190.591	299.077	246.533	99.914	182.1	198.132	16.0318
	292.283	45	177.759	1.0241	2.68725	29.5164	34.0497	20.0556	30.1836	553.645	451.78	0	225.492	1.7135	2.68601	605.014	443.68	0.9611	70.9294	0	118.406	183.473	269.589	278.924	88.6935	174.096	172.077	2.01924
	292.283	66.6	177.759	1.0241	2.68725	29.5164	34.0497	20.0556	30.1836	553.645	451.78	0	225.492	1.7135	2.68601	605.014	443.68	0.9611	70.9294	0	118.406	173.569	228.552	317.38	75.1591	161.073	159.609	1.46417
	292.283	100	177.759	1.0241	2.68725	29.5164	34.0497	20.0556	30.1836	553.645	451.78	0	225.492	1.7135	2.68601	605.014	443.68	0.9611	70.9294	0	118.406	163.19	185.551	349.384	63.176	144.533	159.934	15.4003
	292.283	333	177.759	1.0241	2.68725	29.5164	34.0497	20.0556	30.1836	553.645	451.78	0	225.492	1.7135	2.68601	605.014	443.68	0.9611	70.9294	0	118.406	138.161	81.849	325.937	42.1199	83.5761	73.8063	9.76983
	292.283	450	177.759	1.0241	2.68725	29.5164	34.0497	20.0556	30.1836	553.645	451.78	0	225.492	1.7135	2.68601	605.014	443.68	0.9611	70.9294	0	118.406	133.916	64.2607	261.695	39.9332	65.8834	44.771	21.1124
	292.283	666	177.759	1.0241	2.68725	29.5164	34.0497	20.0556	30.1836	553.645	451.78	0	225.492	1.7135	2.68601	605.014	443.68	0.9611	70.9294	0	118.406	129.554	46.1867	153.508	38.3185	43.9922	55.5469	11.5547
	292.283	800	177.759	1.0241	2.68725	29.5164	34.0497	20.0556	30.1836	553.645	451.78	0	225.492	1.7135	2.68601	605.014	443.68	0.9611	70.9294	0	118.406	127.913	39.388	107.924	37.8151	35.5209	23.7717	11.7492
	292.283	1000	177.759	1.0241	2.68725	29.5164	34.0497	20.0556	30.1836	553.645	451.78	0	225.492	1.7135	2.68601	605.014	443.68	0.9611	70.9294	0	118.406	126.211	32.3393	64.9478	37.2826	27.23	43.9421	16.7121
	292.283	1800	177.759	1.0241	2.68725	29.5164	34.0497	20.0556	30.1836	553.645	451.78	0	225.492	1.7135	2.68601	605.014	443.68	0.9611	70.9294	0	118.406	122.987	18.9788	11.7789	36.0856	13.9976	6.76522	7.23239
	292.283	3333	177.759	1.0241	2.68725	29.5164	34.0497	20.0556	30.1836	553.645	451.78	0	225.492	1.7135	2.68601	605.014	443.68	0.9611	70.9294	0	118.406	120.989	10.7028	0.13867	35.2026	7.45029	3.37416	4.07613
	292.283	6666	177.759	1.0241	2.68725	29.5164	34.0497	20.0556	30.1836	553.645	451.78	0	225.492	1.7135	2.68601	605.014	443.68	0.9611	70.9294	0	118.406	119.749	5.56291	-1.14668	34.6311	3.79877	12.616	8.81728
	292.283	10000	177.759	1.0241	2.68725	29.5164	34.0497	20.0556	30.1836	553.645	451.78	0	225.492	1.7135	2.68601	605.014	443.68	0.9611	70.9294	0	118.406	119.319	3.78251	-0.94061	34.4359	2.57511	5.7544	3.17929
	292.283	21000	177.759	1.0241	2.68725	29.5164	34.0497	20.0556	30.1836	553.645	451.78	0	225.492	1.7135	2.68601	605.014	443.68	0.9611	70.9294	0	118.406	118.855	1.86203	-0.503516	34.2312	1.26676	1.72046	0.453695
	292.283	33000	177.759	1.0241	2.68725	29.5164	34.0497	20.0556	30.1836	553.645	451.78	0	225.492	1.7135	2.68601	605.014	443.68	0.9611	70.9294	0	118.406	118.698	1.20773	-0.325684	34.1641	0.822148	0.64979	0.172358
	292.283	100000	177.759	1.0241	2.68725	29.5164	34.0497	20.0556	30.1836	553.645	451.78	0	225.492	1.7135	2.68601	605.014	443.68	0.9611	70.9294	0	118.406	118.507	0.41686	-0.10677	34.0865	0.284361	0.36552	0.0811594
																												239.115
	292.283	50000	177.759	1.0241	2.68725	29.5164	34.0497	20.0556	30.1836	553.645	451.78	0	225.492	1.7135	2.68601	605.014	443.68	0.9611	70.9294	0	118.406	118.602	0.810819	-0.215366	34.1245	0.552371
	292.283	45000	177.759	1.0241	2.68725	29.5164	34.0497	20.0556	30.1836	553.645	451.78	0	225.492	1.7135	2.68601	605.014	443.68	0.9611	70.9294	0	118.406	118.623	0.897051	-0.239354	34.133	0.610995
	292.283	40500	177.759	1.0241	2.68725	29.5164	34.0497	20.0556	30.1836	553.645	451.78	0	225.492	1.7135	2.68601	605.014	443.68	0.9611	70.9294	0	118.406	118.646	0.992432	-0.265898	34.1425	0.675829
	292.283	36450	177.759	1.0241	2.68725	29.5164	34.0497	20.0556	30.1836	553.645	451.78	0	225.492	1.7135	2.68601	605.014	443.68	0.9611	70.9294	0	118.406	118.671	1.09793	-0.295229	34.153	0.74753
	292.283	32805	177.759	1.0241	2.68725	29.5164	34.0497	20.0556	30.1836	553.645	451.78	0	225.492	1.7135	2.68601	605.014	443.68	0.9611	70.9294	0	118.406	118.699	1.21461	-0.327589	34.1648	0.826823
	292.283	29524.5	177.759	1.0241	2.68725	29.5164	34.0497	20.0556	30.1836	553.645	451.78	0	225.492	1.7135	2.68601	605.014	443.68	0.9611	70.9294	0	118.406	118.73	1.34366	-0.363219	34.1779	0.914511
	292.283	26572	177.759	1.0241	2.68725	29.5164	34.0497	20.0556	30.1836	553.645	451.78	0	225.492	1.7135	2.68601	605.014	443.68	0.9611	70.9294	0	118.406	118.765	1.48637	-0.402358	34.1925	1.01148
	292.283	23914.8	177.759	1.0241	2.68725	29.5164	34.0497	20.0556	30.1836	553.645	451.78	0	225.492	1.7135	2.68601	605.014	443.68	0.9611	70.9294	0	118.406	118.803	1.64418	-0.445225	34.2087	1.11871
	292.283	21523.4	177.759	1.0241	2.68725	29.5164	34.0497	20.0556	30.1836	553.645	451.78	0	225.492	1.7135	2.68601	605.014	443.68	0.9611	70.9294	0	118.406	118.845	1.81867	-0.492006	34.2267	1.2373
	292.283	19371	177.759	1.0241	2.68725	29.5164	34.0497	20.0556	30.1836	553.645	451.78	0	225.492	1.7135	2.68601	605.014	443.68	0.9611	70.9294	0	118.406	118.892	2.0116	-0.542832	34.2468	1.36843
	292.283	17433.9	177.759	1.0241	2.68725	29.5164	34.0497	20.0556	30.1836	553.645	451.78	0	225.492	1.7135	2.68601	605.014	443.68	0.9611	70.9294	0	118.406	118.943	2.2249	-0.597743	34.2692	1.51345
	292.283	15690.5	177.759	1.0241	2.68725	29.5164	34.0497	20.0556	30.1836	553.645	451.78	0	225.492	1.7135	2.68601	605.014	443.68	0.9611	70.9294	0	118.406	119	2.46068	-0.656651	34.294	1.67383
	292.283	14121.5	177.759	1.0241	2.68725	29.5164	34.0497	20.0556	30.1836	553.645	451.78	0	225.492	1.7135	2.68601	605.014	443.68	0.9611	70.9294	0	118.406	119.063	2.7213	-0.719271	34.3217	1.85121
	292.283	12709.3	177.759	1.0241	2.68725	29.5164	34.0497	20.0556	30.1836	553.645	451.78	0	225.492	1.7135	2.68601	605.014	443.68	0.9611	70.9294	0	118.406	119.132	3.00933	-0.785049	34.3524	2.0474
	292.283	11438.4	177.759	1.0241	2.68725	29.5164	34.0497	20.0556	30.1836	553.645	451.78	0	225.492	1.7135	2.68601	605.014	443.68	0.9611	70.9294	0	118.406	119.209	3.32762	-0.853049	34.3866	2.26444
	292.283	10294.6	177.759	1.0241	2.68725	29.5164	34.0497	20.0556	30.1836	553.645	451.78	0	225.492	1.7135	2.68601	605.014	443.68	0.9611	70.9294	0	118.406	119.294	3.6793	-0.921804	34.4247	2.50456
	292.283	9265.1	177.759	1.0241	2.68725	29.5164	34.0497	20.0556	30.1836	553.645	451.78	0	225.492	1.7135	2.68601	605.014	443.68	0.9611	70.9294	0	118.406	119.388	4.06779	-0.989121	34.4669	2.77029
	292.283	8338.59	177.759	1.0241	2.68725	29.5164	34.0497	20.0556	30.1836	553.645	451.78	0	225.492	1.7135	2.68601	605.014	443.68	0.9611	70.9294	0	118.406	119.491	4.49689	-1.05182	34.5138	3.06445
	292.283	7504.73	177.759	1.0241	2.68725	29.5164	34.0497	20.0556	30.1836	553.645	451.78	0	225.492	1.7135	2.68601	605.014	443.68	0.9611	70.9294	0	118.406	119.606	4.97074	-1.10536	34.5658	3.39018
	292.283	6754.26	177.759	1.0241	2.68725	29.5164	34.0497	20.0556	30.1836	553.645	451.78	0	225.492	1.7135	2.68601	605.014	443.68	0.9611	70.9294	0	118.406	119.732	5.49389	-1.14342	34.6235	3.75106
	292.283	6078.83	177.759	1.0241	2.68725	29.5164	34.0497	20.0556	30.1836	553.645	451.78	0	225.492	1.7135	2.68601	605.014	443.68	0.9611	70.9294	0	118.406	119.871	6.07135	-1.15721	34.6874	4.15109
	292.283	5470.95	177.759	1.0241	2.68725	29.5164	34.0497	20.0556	30.1836	553.645	451.78	0	225.492	1.7135	2.68601	605.014	443.68	0.9611	70.9294	0	118.406	120.025	6.70856	-1.13472	34.7582	4.59487
	292.283	4923.85	177.759	1.0241	2.68725	29.5164	34.0497	20.0556	30.1836	553.645	451.78	0	225.492	1.7135	2.68601	605.014	443.68	0.9611	70.9294	0	118.406	120.195	7.41153	-1.05955	34.8364	5.08763
	292.283	4431.47	177.759	1.0241	2.68725	29.5164	34.0497	20.0556	30.1836	553.645	451.78	0	225.492	1.7135	2.68601	605.014	443.68	0.9611	70.9294	0	118.406	120.382	8.18678	-0.909593	34.9228	5.63537
	292.283	3988.32	177.759	1.0241	2.68725	29.5164	34.0497	20.0556	30.1836	553.645	451.78	0	225.492	1.7135	2.68601	605.014	443.68	0.9611	70.9294	0	118.406	120.588	9.04144	-0.655096	35.018	6.24507
	292.283	3589.49	177.759	1.0241	2.68725	29.5164	34.0497	20.0556	30.1836	553.645	451.78	0	225.492	1.7135	2.68601	605.014	443.68	0.9611	70.9294	0	118.406	120.816	9.98327	-0.256315	35.1228	6.92485
	292.283	3230.54	177.759	1.0241	2.68725	29.5164	34.0497	20.0556	30.1836	553.645	451.78	0	225.492	1.7135	2.68601	605.014	443.68	0.9611	70.9294	0	118.406	121.066	11.0207	0.339565	35.2377	7.68427
	292.283	2907.49	177.759	1.0241	2.68725	29.5164	34.0497	20.0556	30.1836	553.645	451.78	0	225.492	1.7135	2.68601	605.014	443.68	0.9611	70.9294	0	118.406	121.342	12.163	1.20229	35.3636	8.53463
	292.283	2616.74	177.759	1.0241	2.68725	29.5164	34.0497	20.0556	30.1836	553.645	451.78	0	225.492	1.7135	2.68601	605.014	443.68	0.9611	70.9294	0	118.406	121.645	13.4199	2.42333	35.5008	9.48938
	292.283	2355.06	177.759	1.0241	2.68725	29.5164	34.0497	20.0556	30.1836	553.645	451.78	0	225.492	1.7135	2.68601	605.014	443.68	0.9611	70.9294	0	118.406	121.979	14.8023	4.12159	35.65	10.5647
	292.283	2119.56	177.759	1.0241	2.68725	29.5164	34.0497	20.0556	30.1836	553.645	451.78	0	225.492	1.7135	2.68601	605.014	443.68	0.9611	70.9294	0	118.406	122.345	16.3217	6.45011	35.8113	11.7799
	292.283	1907.6	177.759	1.0241	2.68725	29.5164	34.0497	20.0556	30.1836	553.645	451.78	0	225.492	1.7135	2.68601	605.014	443.68	0.9611	70.9294	0	118.406	122.748	17.9906	9.60311	35.9848	13.1583
	292.283	1716.84	177.759	1.0241	2.68725	29.5164	34.0497	20.0556	30.1836	553.645	451.78	0	225.492	1.7135	2.68601	605.014	443.68	0.9611	70.9294	0	118.406	123.19	19.8221	13.8228	36.1703	14.7279
	292.283	1545.16	177.759	1.0241	2.68725	29.5164	34.0497	20.0556	30.1836	553.645	451.78	0	225.492	1.7135	2.68601	605.014	443.68	0.9611	70.9294	0	118.406	123.675	21.8305	19.4041	36.3672	16.5219
	292.283	1390.64	177.759	1.0241	2.68725	29.5164	34.0497	20.0556	30.1836	553.645	451.78	0	225.492	1.7135	2.68601	605.014	443.68	0.9611	70.9294	0	118.406	124.206	24.0309	26.6946	36.5747	18.5792
	292.283	1251.58	177.759	1.0241	2.68725	29.5164	34.0497	20.0556	30.1836	553.645	451.78	0	225.492	1.7135	2.68601	605.014	443.68	0.9611	70.9294	0	118.406	124.787	26.4392	36.0857	36.7918	20.944
	292.283	1126.42	177.759	1.0241	2.68725	29.5164	34.0497	20.0556	30.1836	553.645	451.78	0	225.492	1.7135	2.68601	605.014	443.68	0.9611	70.9294	0	118.406	125.423	29.0721	47.9894	37.0176	23.6649
	292.283	1013.78	177.759	1.0241	2.68725	29.5164	34.0497	20.0556	30.1836	553.645	451.78	0	225.492	1.7135	2.68601	605.014	443.68	0.9611	70.9294	0	118.406	126.117	31.9472	62.7948	37.2516	26.7916
	292.283	912.4	177.759	1.0241	2.68725	29.5164	34.0497	20.0556	30.1836	553.645	451.78	0	225.492	1.7135	2.68601	605.014	443.68	0.9611	70.9294	0	118.406	126.873	35.0825	80.8017	37.4946	30.3704
	292.283	821.16	177.759	1.0241	2.68725	29.5164	34.0497	20.0556	30.1836	553.645	451.78	0	225.492	1.7135	2.68601	605.014	443.68	0.9611	70.9294	0	118.406	127.698	38.4967	102.134	37.7495	34.436
	292.283	739.044	177.759	1.0241	2.68725	29.5164	34.0497	20.0556	30.1836	553.645	451.78	0	225.492	1.7135	2.68601	605.014	443.68	0.9611	70.9294	0	118.406	128.593	42.2089	126.647	38.0222	39.0031
	292.283	665.14	177.759	1.0241	2.68725	29.5164	34.0497	20.0556	30.1836	553.645	451.78	0	225.492	1.7135	2.68601	605.014	443.68	0.9611	70.9294	0	118.406	129.566	46.2382	153.855	38.3224	44.057
	292.283	598.626	177.759	1.0241	2.68725	29.5164	34.0497	20.0556	30.1836	553.645	451.78	0	225.492	1.7135	2.68601	605.014	443.68	0.9611	70.9294	0	118.406	130.62	50.6036	182.92	38.6638	49.548
	292.283	538.763	177.759	1.0241	2.68725	29.5164	34.0497	20.0556	30.1836	553.645	451.78	0	225.492	1.7135	2.68601	605.014	443.68	0.9611	70.9294	0	118.406	131.759	55.3238	212.713	39.0632	55.3925
	292.283	484.887	177.759	1.0241	2.68725	29.5164	34.0497	20.0556	30.1836	553.645	451.78	0	225.492	1.7135	2.68601	605.014	443.68	0.9611	70.9294	0	118.406	132.988	60.4167	241.965	39.5392	61.4826
	292.283	436.398	177.759	1.0241	2.68725	29.5164	34.0497	20.0556	30.1836	553.645	451.78	0	225.492	1.7135	2.68601	605.014	443.68	0.9611	70.9294	0	118.406	134.311	65.8988	269.458	40.1105	67.7019
	292.283	392.758	177.759	1.0241	2.68725	29.5164	34.0497	20.0556	30.1836	553.645	451.78	0	225.492	1.7135	2.68601	605.014	443.68	0.9611	70.9294	0	118.406	135.732	71.7852	294.194	40.7936	73.9434
	292.283	353.483	177.759	1.0241	2.68725	29.5164	34.0497	20.0556	30.1836	553.645	451.78	0	225.492	1.7135	2.68601	605.014	443.68	0.9611	70.9294	0	118.406	137.253	78.0887	315.51	41.6022	80.1236
	292.283	318.134	177.759	1.0241	2.68725	29.5164	34.0497	20.0556	30.1836	553.645	451.78	0	225.492	1.7135	2.68601	605.014	443.68	0.9611	70.9294	0	118.406	138.878	84.8194	333.094	42.5464	86.1885
	292.283	286.321	177.759	1.0241	2.68725	29.5164	34.0497	20.0556	30.1836	553.645	451.78	0	225.492	1.7135	2.68601	605.014	443.68	0.9611	70.9294	0	118.406	140.607	91.9844	346.943	43.6339	92.1122
	292.283	257.689	177.759	1.0241	2.68725	29.5164	34.0497	20.0556	30.1836	553.645	451.78	0	225.492	1.7135	2.68601	605.014	443.68	0.9611	70.9294	0	118.406	142.442	99.5866	357.272	44.8699	97.89
	292.283	231.92	177.759	1.0241	2.68725	29.5164	34.0497	20.0556	30.1836	553.645	451.78	0	225.492	1.7135	2.68601	605.014	443.68	0.9611	70.9294	0	118.406	144.382	107.625	364.426	46.2584	103.531
	292.283	208.728	177.759	1.0241	2.68725	29.5164	34.0497	20.0556	30.1836	553.645	451.78	0	225.492	1.7135	2.68601	605.014	443.68	0.9611	70.9294	0	118.406	146.426	116.093	368.8	47.803	109.048
	292.283	187.855	177.759	1.0241	2.68725	29.5164	34.0497	20.0556	30.1836	553.645	451.78	0	225.492	1.7135	2.68601	605.014	443.68	0.9611	70.9294	0	118.406	148.571	124.98	370.787	49.5067	114.453
	292.283	169.07	177.759	1.0241	2.68725	29.5164	34.0497	20.0556	30.1836	553.645	451.78	0	225.492	1.7135	2.68601	605.014	443.68	0.9611	70.9294	0	118.406	150.813	134.268	370.746	51.3726	119.756
	292.283	152.163	177.759	1.0241	2.68725	29.5164	34.0497	20.0556	30.1836	553.645	451.78	0	225.492	1.7135	2.68601	605.014	443.68	0.9611	70.9294	0	118.406	153.146	143.934	368.988	53.4037	124.958
	292.283	136.946	177.759	1.0241	2.68725	29.5164	34.0497	20.0556	30.1836	553.645	451.78	0	225.492	1.7135	2.68601	605.014	443.68	0.9611	70.9294	0	118.406	155.563	153.951	365.771	55.6025	130.056
	292.283	123.252	177.759	1.0241	2.68725	29.5164	34.0497	20.0556	30.1836	553.645	451.78	0	225.492	1.7135	2.68601	605.014	443.68	0.9611	70.9294	0	118.406	158.057	164.282	361.306	57.971	135.039
	292.283	110.927	177.759	1.0241	2.68725	29.5164	34.0497	20.0556	30.1836	553.645	451.78	0	225.492	1.7135	2.68601	605.014	443.68	0.9611	70.9294	0	118.406	160.617	174.888	355.762	60.5103	139.895
	292.283	99.8339	177.759	1.0241	2.68725	29.5164	34.0497	20.0556	30.1836	553.645	451.78	0	225.492	1.7135	2.68601	605.014	443.68	0.9611	70.9294	0	118.406	163.232	185.724	349.275	63.22	144.606
	292.283	89.8505	177.759	1.0241	2.68725	29.5164	34.0497	20.0556	30.1836	553.645	451.78	0	225.492	1.7135	2.68601	605.014	443.68	0.9611	70.9294	0	118.406	165.891	196.74	341.957	66.0985	149.157
	292.283	80.8655	177.759	1.0241	2.68725	29.5164	34.0497	20.0556	30.1836	553.645	451.78	0	225.492	1.7135	2.68601	605.014	443.68	0.9611	70.9294	0	118.406	168.58	207.882	333.899	69.142	153.53
	292.283	72.7789	177.759	1.0241	2.68725	29.5164	34.0497	20.0556	30.1836	553.645	451.78	0	225.492	1.7135	2.68601	605.014	443.68	0.9611	70.9294	0	118.406	171.287	219.096	325.181	72.3446	157.711
	292.283	65.501	177.759	1.0241	2.68725	29.5164	34.0497	20.0556	30.1836	553.645	451.78	0	225.492	1.7135	2.68601	605.014	443.68	0.9611	70.9294	0	118.406	173.996	230.323	315.874	75.6983	161.687
	292.283	58.9509	177.759	1.0241	2.68725	29.5164	34.0497	20.0556	30.1836	553.645	451.78	0	225.492	1.7135	2.68601	605.014	443.68	0.9611	70.9294	0	118.406	176.696	241.508	306.045	79.1926	165.45
	292.283	53.0558	177.759	1.0241	2.68725	29.5164	34.0497	20.0556	30.1836	553.645	451.78	0	225.492	1.7135	2.68601	605.014	443.68	0.9611	70.9294	0	118.406	179.371	252.592	295.759	82.8144	168.994
	292.283	47.7502	177.759	1.0241	2.68725	29.5164	34.0497	20.0556	30.1836	553.645	451.78	0	225.492	1.7135	2.68601	605.014	443.68	0.9611	70.9294	0	118.406	182.009	263.522	285.082	86.5484	172.319
	292.283	42.9752	177.759	1.0241	2.68725	29.5164	34.0497	20.0556	30.1836	553.645	451.78	0	225.492	1.7135	2.68601	605.014	443.68	0.9611	70.9294	0	118.406	184.598	274.247	274.082	90.3769	175.428
	292.283	38.6777	177.759	1.0241	2.68725	29.5164	34.0497	20.0556	30.1836	553.645	451.78	0	225.492	1.7135	2.68601	605.014	443.68	0.9611	70.9294	0	118.406	187.125	284.718	262.826	94.2804	178.326
	292.283	34.8099	177.759	1.0241	2.68725	29.5164	34.0497	20.0556	30.1836	553.645	451.78	0	225.492	1.7135	2.68601	605.014	443.68	0.9611	70.9294	0	118.406	189.581	294.892	251.386	98.2377	181.023
	292.283	31.3289	177.759	1.0241	2.68725	29.5164	34.0497	20.0556	30.1836	553.645	451.78	0	225.492	1.7135	2.68601	605.014	443.68	0.9611	70.9294	0	118.406	191.956	304.734	239.833	102.226	183.528
	292.283	28.196	177.759	1.0241	2.68725	29.5164	34.0497	20.0556	30.1836	553.645	451.78	0	225.492	1.7135	2.68601	605.014	443.68	0.9611	70.9294	0	118.406	194.243	314.21	228.24	106.224	185.855
	292.283	25.3764	177.759	1.0241	2.68725	29.5164	34.0497	20.0556	30.1836	553.645	451.78	0	225.492	1.7135	2.68601	605.014	443.68	0.9611	70.9294	0	118.406	196.436	323.296	216.679	110.206	188.016
	292.283	22.8388	177.759	1.0241	2.68725	29.5164	34.0497	20.0556	30.1836	553.645	451.78	0	225.492	1.7135	2.68601	605.014	443.68	0.9611	70.9294	0	118.406	198.53	331.97	205.219	114.15	190.024
	292.283	20.5549	177.759	1.0241	2.68725	29.5164	34.0497	20.0556	30.1836	553.645	451.78	0	225.492	1.7135	2.68601	605.014	443.68	0.9611	70.9294	0	118.406	200.521	340.219	193.926	118.035	191.891
	292.283	18.4994	177.759	1.0241	2.68725	29.5164	34.0497	20.0556	30.1836	553.645	451.78	0	225.492	1.7135	2.68601	605.014	443.68	0.9611	70.9294	0	118.406	202.407	348.035	182.863	121.839	193.63
	292.283	16.6495	177.759	1.0241	2.68725	29.5164	34.0497	20.0556	30.1836	553.645	451.78	0	225.492	1.7135	2.68601	605.014	443.68	0.9611	70.9294	0	118.406	204.188	355.414	172.085	125.544	195.25
	292.283	14.9845	177.759	1.0241	2.68725	29.5164	34.0497	20.0556	30.1836	553.645	451.78	0	225.492	1.7135	2.68601	605.014	443.68	0.9611	70.9294	0	118.406	205.863	362.356	161.642	129.133	196.761
	292.283	13.4861	177.759	1.0241	2.68725	29.5164	34.0497	20.0556	30.1836	553.645	451.78	0	225.492	1.7135	2.68601	605.014	443.68	0.9611	70.9294	0	118.406	207.435	368.867	151.578	132.591	198.173
	292.283	12.1375	177.759	1.0241	2.68725	29.5164	34.0497	20.0556	30.1836	553.645	451.78	0	225.492	1.7135	2.68601	605.014	443.68	0.9611	70.9294	0	118.406	208.905	374.956	141.927	135.907	199.491
	292.283	10.9237	177.759	1.0241	2.68725	29.5164	34.0497	20.0556	30.1836	553.645	451.78	0	225.492	1.7135	2.68601	605.014	443.68	0.9611	70.9294	0	118.406	210.275	380.634	132.717	139.07	200.723
	292.283	9.83135	177.759	1.0241	2.68725	29.5164	34.0497	20.0556	30.1836	553.645	451.78	0	225.492	1.7135	2.68601	605.014	443.68	0.9611	70.9294	0	118.406	211.55	385.915	123.97	142.075	201.874
	292.283	8.84822	177.759	1.0241	2.68725	29.5164	34.0497	20.0556	30.1836	553.645	451.78	0	225.492	1.7135	2.68601	605.014	443.68	0.9611	70.9294	0	118.406	212.732	390.815	115.698	144.916	202.949
	292.283	7.9634	177.759	1.0241	2.68725	29.5164	34.0497	20.0556	30.1836	553.645	451.78	0	225.492	1.7135	2.68601	605.014	443.68	0.9611	70.9294	0	118.406	213.827	395.352	107.907	147.592	203.951
	292.283	7.16706	177.759	1.0241	2.68725	29.5164	34.0497	20.0556	30.1836	553.645	451.78	0	225.492	1.7135	2.68601	605.014	443.68	0.9611	70.9294	0	118.406	214.839	399.543	100.599	150.102	204.886
	292.283	6.45035	177.759	1.0241	2.68725	29.5164	34.0497	20.0556	30.1836	553.645	451.78	0	225.492	1.7135	2.68601	605.014	443.68	0.9611	70.9294	0	118.406	215.772	403.407	93.7677	152.448	205.756
	292.283	5.80532	177.759	1.0241	2.68725	29.5164	34.0497	20.0556	30.1836	553.645	451.78	0	225.492	1.7135	2.68601	605.014	443.68	0.9611	70.9294	0	118.406	216.63	406.965	87.4049	154.633	206.564
	292.283	5.22478	177.759	1.0241	2.68725	29.5164	34.0497	20.0556	30.1836	553.645	451.78	0	225.492	1.7135	2.68601	605.014	443.68	0.9611	70.9294	0	118.406	217.419	410.234	81.497	156.661	207.315
	292.283	4.70231	177.759	1.0241	2.68725	29.5164	34.0497	20.0556	30.1836	553.645	451.78	0	225.492	1.7135	2.68601	605.014	443.68	0.9611	70.9294	0	118.406	218.143	413.234	76.0277	158.54	208.01
	292.283	4.23207	177.759	1.0241	2.68725	29.5164	34.0497	20.0556	30.1836	553.645	451.78	0	225.492	1.7135	2.68601	605.014	443.68	0.9611	70.9294	0	118.406	218.807	415.983	70.9782	160.273	208.653
	292.283	3.80887	177.759	1.0241	2.68725	29.5164	34.0497	20.0556	30.1836	553.645	451.78	0	225.492	1.7135	2.68601	605.014	443.68	0.9611	70.9294	0	118.406	219.414	418.499	66.3281	161.87	209.248
	292.283	3.42798	177.759	1.0241	2.68725	29.5164	34.0497	20.0556	30.1836	553.645	451.78	0	225.492	1.7135	2.68601	605.014	443.68	0.9611	70.9294	0	118.406	219.969	420.799	62.0558	163.337	209.796
	292.283	3.08518	177.759	1.0241	2.68725	29.5164	34.0497	20.0556	30.1836	553.645	451.78	0	225.492	1.7135	2.68601	605.014	443.68	0.9611	70.9294	0	118.406	220.476	422.899	58.139	164.682	210.3
	292.283	2.77666	177.759	1.0241	2.68725	29.5164	34.0497	20.0556	30.1836	553.645	451.78	0	225.492	1.7135	2.68601	605.014	443.68	0.9611	70.9294	0	118.406	220.939	424.815	54.555	165.913	210.764
	292.283	2.499	177.759	1.0241	2.68725	29.5164	34.0497	20.0556	30.1836	553.645	451.78	0	225.492	1.7135	2.68601	605.014	443.68	0.9611	70.9294	0	118.406	221.36	426.562	51.2816	167.037	211.19
	292.283	2.2491	177.759	1.0241	2.68725	29.5164	34.0497	20.0556	30.1836	553.645	451.78	0	225.492	1.7135	2.68601	605.014	443.68	0.9611	70.9294	0	118.406	221.744	428.153	48.2967	168.062	211.581
	292.283	2.02419	177.759	1.0241	2.68725	29.5164	34.0497	20.0556	30.1836	553.645	451.78	0	225.492	1.7135	2.68601	605.014	443.68	0.9611	70.9294	0	118.406	222.094	429.601	45.579	168.995	211.939
	292.283	1.82177	177.759	1.0241	2.68725	29.5164	34.0497	20.0556	30.1836	553.645	451.78	0	225.492	1.7135	2.68601	605.014	443.68	0.9611	70.9294	0	118.406	222.411	430.917	43.1078	169.844	212.266
	292.283	1.63959	177.759	1.0241	2.68725	29.5164	34.0497	20.0556	30.1836	553.645	451.78	0	225.492	1.7135	2.68601	605.014	443.68	0.9611	70.9294	0	118.406	222.7	432.115	40.8636	170.614	212.565
	292.283	1.47563	177.759	1.0241	2.68725	29.5164	34.0497	20.0556	30.1836	553.645	451.78	0	225.492	1.7135	2.68601	605.014	443.68	0.9611	70.9294	0	118.406	222.963	433.202	38.8279	171.313	212.838
	292.283	1.32807	177.759	1.0241	2.68725	29.5164	34.0497	20.0556	30.1836	553.645	451.78	0	225.492	1.7135	2.68601	605.014	443.68	0.9611	70.9294	0	118.406	223.201	434.189	36.9831	171.947	213.087
	292.283	1.19526	177.759	1.0241	2.68725	29.5164	34.0497	20.0556	30.1836	553.645	451.78	0	225.492	1.7135	2.68601	605.014	443.68	0.9611	70.9294	0	118.406	223.417	435.086	35.3129	172.52	213.314
	292.283	1.07574	177.759	1.0241	2.68725	29.5164	34.0497	20.0556	30.1836	553.645	451.78	0	225.492	1.7135	2.68601	605.014	443.68	0.9611	70.9294	0	118.406	223.614	435.899	33.8021	173.039	213.521
	292.283	0.968163	177.759	1.0241	2.68725	29.5164	34.0497	20.0556	30.1836	553.645	451.78	0	225.492	1.7135	2.68601	605.014	443.68	0.9611	70.9294	0	118.406	223.792	436.636	32.4364	173.508	213.709
	292.283	0.871347	177.759	1.0241	2.68725	29.5164	34.0497	20.0556	30.1836	553.645	451.78	0	225.492	1.7135	2.68601	605.014	443.68	0.9611	70.9294	0	118.406	223.953	437.305	31.2027	173.932	213.88
	292.283	0.784212	177.759	1.0241	2.68725	29.5164	34.0497	20.0556	30.1836	553.645	451.78	0	225.492	1.7135	2.68601	605.014	443.68	0.9611	70.9294	0	118.406	224.099	437.911	30.0891	174.314	214.035
	292.283	0.705791	177.759	1.0241	2.68725	29.5164	34.0497	20.0556	30.1836	553.645	451.78	0	225.492	1.7135	2.68601	605.014	443.68	0.9611	70.9294	0	118.406	224.232	438.46	29.0843	174.659	214.176
	292.283	0.635212	177.759	1.0241	2.68725	29.5164	34.0497	20.0556	30.1836	553.645	451.78	0	225.492	1.7135	2.68601	605.014	443.68	0.9611	70.9294	0	118.406	224.352	438.957	28.1782	174.97	214.305
	292.283	0.571691	177.759	1.0241	2.68725	29.5164	34.0497	20.0556	30.1836	553.645	451.78	0	225.492	1.7135	2.68601	605.014	443.68	0.9611	70.9294	0	118.406	224.46	439.408	27.3615	175.251	214.421
	292.283	0.514522	177.759	1.0241	2.68725	29.5164	34.0497	20.0556	30.1836	553.645	451.78	0	225.492	1.7135	2.68601	605.014	443.68	0.9611	70.9294	0	118.406	224.559	439.815	26.6256	175.503	214.527
	292.283	0.463069	177.759	1.0241	2.68725	29.5164	34.0497	20.0556	30.1836	553.645	451.78	0	225.492	1.7135	2.68601	605.014	443.68	0.9611	70.9294	0	118.406	224.648	440.185	25.9628	175.731	214.622
	292.283	0.416762	177.759	1.0241	2.68725	29.5164	34.0497	20.0556	30.1836	553.645	451.78	0	225.492	1.7135	2.68601	605.014	443.68	0.9611	70.9294	0	118.406	224.729	440.519	25.366	175.936	214.709
	292.283	0.375086	177.759	1.0241	2.68725	29.5164	34.0497	20.0556	30.1836	553.645	451.78	0	225.492	1.7135	2.68601	605.014	443.68	0.9611	70.9294	0	118.406	224.802	440.821	24.8289	176.12	214.788
	292.283	0.337578	177.759	1.0241	2.68725	29.5164	34.0497	20.0556	30.1836	553.645	451.78	0	225.492	1.7135	2.68601	605.014	443.68	0.9611	70.9294	0	118.406	224.868	441.095	24.3455	176.286	214.859
	292.283	0.30382	177.759	1.0241	2.68725	29.5164	34.0497	20.0556	30.1836	553.645	451.78	0	225.492	1.7135	2.68601	605.014	443.68	0.9611	70.9294	0	118.406	224.928	441.343	23.9106	176.436	214.924
	292.283	0.273438	177.759	1.0241	2.68725	29.5164	34.0497	20.0556	30.1836	553.645	451.78	0	225.492	1.7135	2.68601	605.014	443.68	0.9611	70.9294	0	118.406	224.982	441.567	23.5195	176.57	214.983
	292.283	0.246094	177.759	1.0241	2.68725	29.5164	34.0497	20.0556	30.1836	553.645	451.78	0	225.492	1.7135	2.68601	605.014	443.68	0.9611	70.9294	0	118.406	225.03	441.769	23.1678	176.691	215.036
	292.283	0.221485	177.759	1.0241	2.68725	29.5164	34.0497	20.0556	30.1836	553.645	451.78	0	225.492	1.7135	2.68601	605.014	443.68	0.9611	70.9294	0	118.406	225.075	441.952	22.8515	176.799	215.084
	292.283	0.199336	177.759	1.0241	2.68725	29.5164	34.0497	20.0556	30.1836	553.645	451.78	0	225.492	1.7135	2.68601	605.014	443.68	0.9611	70.9294	0	118.406	225.115	442.118	22.5672	176.897	215.128
	292.283	0.179403	177.759	1.0241	2.68725	29.5164	34.0497	20.0556	30.1836	553.645	451.78	0	225.492	1.7135	2.68601	605.014	443.68	0.9611	70.9294	0	118.406	225.151	442.268	22.3117	176.985	215.167
	292.283	0.161462	177.759	1.0241	2.68725	29.5164	34.0497	20.0556	30.1836	553.645	451.78	0	225.492	1.7135	2.68601	605.014	443.68	0.9611	70.9294	0	118.406	225.184	442.404	22.082	177.063	215.203
	292.283	0.145316	177.759	1.0241	2.68725	29.5164	34.0497	20.0556	30.1836	553.645	451.78	0	225.492	1.7135	2.68601	605.014	443.68	0.9611	70.9294	0	118.406	225.213	442.526	21.8756	177.134	215.235
	292.283	0.130784	177.759	1.0241	2.68725	29.5164	34.0497	20.0556	30.1836	553.645	451.78	0	225.492	1.7135	2.68601	605.014	443.68	0.9611	70.9294	0	118.406	225.24	442.637	21.6902	177.198	215.264
	292.283	0.117706	177.759	1.0241	2.68725	29.5164	34.0497	20.0556	30.1836	553.645	451.78	0	225.492	1.7135	2.68601	605.014	443.68	0.9611	70.9294	0	118.406	225.264	442.737	21.5235	177.255	215.291

## Sheet: s155
			K1	Hilli1 x	Hill2 x	K1is	K1ii	V1	Kx1	Kx2	V1is	V1ii	K2	Hill1	Hill2	K3	V2	Hill xx	Kxx1	V2i	K2i
		42.2831	177.759	1.0241	2.68725	29.5164	34.0497	20.0556	30.1836	553.645	451.78	0	225.492	1.7135	2.68601	605.014	443.68	0.9611	70.9294	0	118.406
	S	I	K1	Hilli1 x	Hill2 x	K1is	K1ii	V1	Kx1	Kx2	V1is	V1ii	K2	Hill1	Hill2	K3	V2	Hill xx	Kxx1	V2i	K2i	K2 term	V2 term	V1 term	K1 term	cal	obs
42.2831	197.283	0.01	177.759	1.0241	2.68725	29.5164	34.0497	20.0556	30.1836	553.645	451.78	0	225.492	1.7135	2.68601	605.014	443.68	0.9611	70.9294	0	118.406	225.47	443.591	20.1735	177.719	177.365	170.004	7.36159
	197.283	0.06	177.759	1.0241	2.68725	29.5164	34.0497	20.0556	30.1836	553.645	451.78	0	225.492	1.7135	2.68601	605.014	443.68	0.9611	70.9294	0	118.406	225.372	443.186	20.7931	177.506	177.34	170.019	7.32115
	197.283	0.33	177.759	1.0241	2.68725	29.5164	34.0497	20.0556	30.1836	553.645	451.78	0	225.492	1.7135	2.68601	605.014	443.68	0.9611	70.9294	0	118.406	224.881	441.15	24.2479	176.32	177.246	170.178	7.06765
	197.283	1	177.759	1.0241	2.68725	29.5164	34.0497	20.0556	30.1836	553.645	451.78	0	225.492	1.7135	2.68601	605.014	443.68	0.9611	70.9294	0	118.406	223.739	436.417	32.8411	173.369	177.095	170.319	6.77573
	197.283	3.33	177.759	1.0241	2.68725	29.5164	34.0497	20.0556	30.1836	553.645	451.78	0	225.492	1.7135	2.68601	605.014	443.68	0.9611	70.9294	0	118.406	220.113	421.396	60.9432	163.719	176.876	171.088	5.7886
	197.283	6.66	177.759	1.0241	2.68725	29.5164	34.0497	20.0556	30.1836	553.645	451.78	0	225.492	1.7135	2.68601	605.014	443.68	0.9611	70.9294	0	118.406	215.496	402.268	95.7914	151.753	176.913	174.55	2.36327
	197.283	10	177.759	1.0241	2.68725	29.5164	34.0497	20.0556	30.1836	553.645	451.78	0	225.492	1.7135	2.68601	605.014	443.68	0.9611	70.9294	0	118.406	211.35	385.089	125.35	141.601	177.097	176.827	0.270235
	197.283	21	177.759	1.0241	2.68725	29.5164	34.0497	20.0556	30.1836	553.645	451.78	0	225.492	1.7135	2.68601	605.014	443.68	0.9611	70.9294	0	118.406	200.124	338.577	196.206	117.251	177.473	181.137	3.66427
	197.283	33.3	177.759	1.0241	2.68725	29.5164	34.0497	20.0556	30.1836	553.645	451.78	0	225.492	1.7135	2.68601	605.014	443.68	0.9611	70.9294	0	118.406	190.591	299.077	246.533	99.914	176.65	184.707	8.05649
	197.283	45	177.759	1.0241	2.68725	29.5164	34.0497	20.0556	30.1836	553.645	451.78	0	225.492	1.7135	2.68601	605.014	443.68	0.9611	70.9294	0	118.406	183.473	269.589	278.924	88.6935	174.796	191.385	16.5895
	197.283	66.6	177.759	1.0241	2.68725	29.5164	34.0497	20.0556	30.1836	553.645	451.78	0	225.492	1.7135	2.68601	605.014	443.68	0.9611	70.9294	0	118.406	173.569	228.552	317.38	75.1591	169.819	164.031	5.78859
	197.283	100	177.759	1.0241	2.68725	29.5164	34.0497	20.0556	30.1836	553.645	451.78	0	225.492	1.7135	2.68601	605.014	443.68	0.9611	70.9294	0	118.406	163.19	185.551	349.384	63.176	160.807	156.613	4.19404
	197.283	333	177.759	1.0241	2.68725	29.5164	34.0497	20.0556	30.1836	553.645	451.78	0	225.492	1.7135	2.68601	605.014	443.68	0.9611	70.9294	0	118.406	138.161	81.849	325.937	42.1199	106.572	97.784	8.78752
	197.283	450	177.759	1.0241	2.68725	29.5164	34.0497	20.0556	30.1836	553.645	451.78	0	225.492	1.7135	2.68601	605.014	443.68	0.9611	70.9294	0	118.406	133.916	64.2607	261.695	39.9332	84.2906	70.773	13.5177
	197.283	666	177.759	1.0241	2.68725	29.5164	34.0497	20.0556	30.1836	553.645	451.78	0	225.492	1.7135	2.68601	605.014	443.68	0.9611	70.9294	0	118.406	129.554	46.1867	153.508	38.3185	54.1723	58.348	4.17567
	197.283	800	177.759	1.0241	2.68725	29.5164	34.0497	20.0556	30.1836	553.645	451.78	0	225.492	1.7135	2.68601	605.014	443.68	0.9611	70.9294	0	118.406	127.913	39.388	107.924	37.8151	42.2791	40.6515	1.62758
	197.283	1000	177.759	1.0241	2.68725	29.5164	34.0497	20.0556	30.1836	553.645	451.78	0	225.492	1.7135	2.68601	605.014	443.68	0.9611	70.9294	0	118.406	126.211	32.3393	64.9478	37.2826	30.8495	20.277	10.5725
	197.283	1800	177.759	1.0241	2.68725	29.5164	34.0497	20.0556	30.1836	553.645	451.78	0	225.492	1.7135	2.68601	605.014	443.68	0.9611	70.9294	0	118.406	122.987	18.9788	11.7789	36.0856	14.0487	13.0681	0.980633
	197.283	3333	177.759	1.0241	2.68725	29.5164	34.0497	20.0556	30.1836	553.645	451.78	0	225.492	1.7135	2.68601	605.014	443.68	0.9611	70.9294	0	118.406	120.989	10.7028	0.13867	35.2026	6.98864	0.53158	6.45706
	197.283	6666	177.759	1.0241	2.68725	29.5164	34.0497	20.0556	30.1836	553.645	451.78	0	225.492	1.7135	2.68601	605.014	443.68	0.9611	70.9294	0	118.406	119.749	5.56291	-1.14668	34.6311	3.47141	1.05899	2.41242
	197.283	10000	177.759	1.0241	2.68725	29.5164	34.0497	20.0556	30.1836	553.645	451.78	0	225.492	1.7135	2.68601	605.014	443.68	0.9611	70.9294	0	118.406	119.319	3.78251	-0.94061	34.4359	2.34183	6.41886	4.07703
	197.283	21000	177.759	1.0241	2.68725	29.5164	34.0497	20.0556	30.1836	553.645	451.78	0	225.492	1.7135	2.68601	605.014	443.68	0.9611	70.9294	0	118.406	118.855	1.86203	-0.503516	34.2312	1.14972	0.21576	0.933964
	197.283	33000	177.759	1.0241	2.68725	29.5164	34.0497	20.0556	30.1836	553.645	451.78	0	225.492	1.7135	2.68601	605.014	443.68	0.9611	70.9294	0	118.406	118.698	1.20773	-0.325684	34.1641	0.746503	0.0153	0.731203
	197.283	100000	177.759	1.0241	2.68725	29.5164	34.0497	20.0556	30.1836	553.645	451.78	0	225.492	1.7135	2.68601	605.014	443.68	0.9611	70.9294	0	118.406	118.507	0.41686	-0.10677	34.0865	0.258764	0.00538	0.253384
																												127.849
	197.283	50000	177.759	1.0241	2.68725	29.5164	34.0497	20.0556	30.1836	553.645	451.78	0	225.492	1.7135	2.68601	605.014	443.68	0.9611	70.9294	0	118.406	118.602	0.810819	-0.215366	34.1245	0.501918
	197.283	45000	177.759	1.0241	2.68725	29.5164	34.0497	20.0556	30.1836	553.645	451.78	0	225.492	1.7135	2.68601	605.014	443.68	0.9611	70.9294	0	118.406	118.623	0.897051	-0.239354	34.133	0.555074
	197.283	40500	177.759	1.0241	2.68725	29.5164	34.0497	20.0556	30.1836	553.645	451.78	0	225.492	1.7135	2.68601	605.014	443.68	0.9611	70.9294	0	118.406	118.646	0.992432	-0.265898	34.1425	0.613855
	197.283	36450	177.759	1.0241	2.68725	29.5164	34.0497	20.0556	30.1836	553.645	451.78	0	225.492	1.7135	2.68601	605.014	443.68	0.9611	70.9294	0	118.406	118.671	1.09793	-0.295229	34.153	0.678857
	197.283	32805	177.759	1.0241	2.68725	29.5164	34.0497	20.0556	30.1836	553.645	451.78	0	225.492	1.7135	2.68601	605.014	443.68	0.9611	70.9294	0	118.406	118.699	1.21461	-0.327589	34.1648	0.750741
	197.283	29524.5	177.759	1.0241	2.68725	29.5164	34.0497	20.0556	30.1836	553.645	451.78	0	225.492	1.7135	2.68601	605.014	443.68	0.9611	70.9294	0	118.406	118.73	1.34366	-0.363219	34.1779	0.830239
	197.283	26572	177.759	1.0241	2.68725	29.5164	34.0497	20.0556	30.1836	553.645	451.78	0	225.492	1.7135	2.68601	605.014	443.68	0.9611	70.9294	0	118.406	118.765	1.48637	-0.402358	34.1925	0.918161
	197.283	23914.8	177.759	1.0241	2.68725	29.5164	34.0497	20.0556	30.1836	553.645	451.78	0	225.492	1.7135	2.68601	605.014	443.68	0.9611	70.9294	0	118.406	118.803	1.64418	-0.445225	34.2087	1.01541
	197.283	21523.4	177.759	1.0241	2.68725	29.5164	34.0497	20.0556	30.1836	553.645	451.78	0	225.492	1.7135	2.68601	605.014	443.68	0.9611	70.9294	0	118.406	118.845	1.81867	-0.492006	34.2267	1.12298
	197.283	19371	177.759	1.0241	2.68725	29.5164	34.0497	20.0556	30.1836	553.645	451.78	0	225.492	1.7135	2.68601	605.014	443.68	0.9611	70.9294	0	118.406	118.892	2.0116	-0.542832	34.2468	1.242
	197.283	17433.9	177.759	1.0241	2.68725	29.5164	34.0497	20.0556	30.1836	553.645	451.78	0	225.492	1.7135	2.68601	605.014	443.68	0.9611	70.9294	0	118.406	118.943	2.2249	-0.597743	34.2692	1.3737
	197.283	15690.5	177.759	1.0241	2.68725	29.5164	34.0497	20.0556	30.1836	553.645	451.78	0	225.492	1.7135	2.68601	605.014	443.68	0.9611	70.9294	0	118.406	119	2.46068	-0.656651	34.294	1.51946
	197.283	14121.5	177.759	1.0241	2.68725	29.5164	34.0497	20.0556	30.1836	553.645	451.78	0	225.492	1.7135	2.68601	605.014	443.68	0.9611	70.9294	0	118.406	119.063	2.7213	-0.719271	34.3217	1.68084
	197.283	12709.3	177.759	1.0241	2.68725	29.5164	34.0497	20.0556	30.1836	553.645	451.78	0	225.492	1.7135	2.68601	605.014	443.68	0.9611	70.9294	0	118.406	119.132	3.00933	-0.785049	34.3524	1.85957
	197.283	11438.4	177.759	1.0241	2.68725	29.5164	34.0497	20.0556	30.1836	553.645	451.78	0	225.492	1.7135	2.68601	605.014	443.68	0.9611	70.9294	0	118.406	119.209	3.32762	-0.853049	34.3866	2.05763
	197.283	10294.6	177.759	1.0241	2.68725	29.5164	34.0497	20.0556	30.1836	553.645	451.78	0	225.492	1.7135	2.68601	605.014	443.68	0.9611	70.9294	0	118.406	119.294	3.6793	-0.921804	34.4247	2.27721
	197.283	9265.1	177.759	1.0241	2.68725	29.5164	34.0497	20.0556	30.1836	553.645	451.78	0	225.492	1.7135	2.68601	605.014	443.68	0.9611	70.9294	0	118.406	119.388	4.06779	-0.989121	34.4669	2.52085
	197.283	8338.59	177.759	1.0241	2.68725	29.5164	34.0497	20.0556	30.1836	553.645	451.78	0	225.492	1.7135	2.68601	605.014	443.68	0.9611	70.9294	0	118.406	119.491	4.49689	-1.05182	34.5138	2.7914
	197.283	7504.73	177.759	1.0241	2.68725	29.5164	34.0497	20.0556	30.1836	553.645	451.78	0	225.492	1.7135	2.68601	605.014	443.68	0.9611	70.9294	0	118.406	119.606	4.97074	-1.10536	34.5658	3.09218
	197.283	6754.26	177.759	1.0241	2.68725	29.5164	34.0497	20.0556	30.1836	553.645	451.78	0	225.492	1.7135	2.68601	605.014	443.68	0.9611	70.9294	0	118.406	119.732	5.49389	-1.14342	34.6235	3.427
	197.283	6078.83	177.759	1.0241	2.68725	29.5164	34.0497	20.0556	30.1836	553.645	451.78	0	225.492	1.7135	2.68601	605.014	443.68	0.9611	70.9294	0	118.406	119.871	6.07135	-1.15721	34.6874	3.80031
	197.283	5470.95	177.759	1.0241	2.68725	29.5164	34.0497	20.0556	30.1836	553.645	451.78	0	225.492	1.7135	2.68601	605.014	443.68	0.9611	70.9294	0	118.406	120.025	6.70856	-1.13472	34.7582	4.21732
	197.283	4923.85	177.759	1.0241	2.68725	29.5164	34.0497	20.0556	30.1836	553.645	451.78	0	225.492	1.7135	2.68601	605.014	443.68	0.9611	70.9294	0	118.406	120.195	7.41153	-1.05955	34.8364	4.68422
	197.283	4431.47	177.759	1.0241	2.68725	29.5164	34.0497	20.0556	30.1836	553.645	451.78	0	225.492	1.7135	2.68601	605.014	443.68	0.9611	70.9294	0	118.406	120.382	8.18678	-0.909593	34.9228	5.20839
	197.283	3988.32	177.759	1.0241	2.68725	29.5164	34.0497	20.0556	30.1836	553.645	451.78	0	225.492	1.7135	2.68601	605.014	443.68	0.9611	70.9294	0	118.406	120.588	9.04144	-0.655096	35.018	5.79871
	197.283	3589.49	177.759	1.0241	2.68725	29.5164	34.0497	20.0556	30.1836	553.645	451.78	0	225.492	1.7135	2.68601	605.014	443.68	0.9611	70.9294	0	118.406	120.816	9.98327	-0.256315	35.1228	6.46598
	197.283	3230.54	177.759	1.0241	2.68725	29.5164	34.0497	20.0556	30.1836	553.645	451.78	0	225.492	1.7135	2.68601	605.014	443.68	0.9611	70.9294	0	118.406	121.066	11.0207	0.339565	35.2377	7.22339
	197.283	2907.49	177.759	1.0241	2.68725	29.5164	34.0497	20.0556	30.1836	553.645	451.78	0	225.492	1.7135	2.68601	605.014	443.68	0.9611	70.9294	0	118.406	121.342	12.163	1.20229	35.3636	8.08719
	197.283	2616.74	177.759	1.0241	2.68725	29.5164	34.0497	20.0556	30.1836	553.645	451.78	0	225.492	1.7135	2.68601	605.014	443.68	0.9611	70.9294	0	118.406	121.645	13.4199	2.42333	35.5008	9.07745
	197.283	2355.06	177.759	1.0241	2.68725	29.5164	34.0497	20.0556	30.1836	553.645	451.78	0	225.492	1.7135	2.68601	605.014	443.68	0.9611	70.9294	0	118.406	121.979	14.8023	4.12159	35.65	10.2191
	197.283	2119.56	177.759	1.0241	2.68725	29.5164	34.0497	20.0556	30.1836	553.645	451.78	0	225.492	1.7135	2.68601	605.014	443.68	0.9611	70.9294	0	118.406	122.345	16.3217	6.45011	35.8113	11.5429
	197.283	1907.6	177.759	1.0241	2.68725	29.5164	34.0497	20.0556	30.1836	553.645	451.78	0	225.492	1.7135	2.68601	605.014	443.68	0.9611	70.9294	0	118.406	122.748	17.9906	9.60311	35.9848	13.0871
	197.283	1716.84	177.759	1.0241	2.68725	29.5164	34.0497	20.0556	30.1836	553.645	451.78	0	225.492	1.7135	2.68601	605.014	443.68	0.9611	70.9294	0	118.406	123.19	19.8221	13.8228	36.1703	14.8982
	197.283	1545.16	177.759	1.0241	2.68725	29.5164	34.0497	20.0556	30.1836	553.645	451.78	0	225.492	1.7135	2.68601	605.014	443.68	0.9611	70.9294	0	118.406	123.675	21.8305	19.4041	36.3672	17.0326
	197.283	1390.64	177.759	1.0241	2.68725	29.5164	34.0497	20.0556	30.1836	553.645	451.78	0	225.492	1.7135	2.68601	605.014	443.68	0.9611	70.9294	0	118.406	124.206	24.0309	26.6946	36.5747	19.557
	197.283	1251.58	177.759	1.0241	2.68725	29.5164	34.0497	20.0556	30.1836	553.645	451.78	0	225.492	1.7135	2.68601	605.014	443.68	0.9611	70.9294	0	118.406	124.787	26.4392	36.0857	36.7918	22.5473
	197.283	1126.42	177.759	1.0241	2.68725	29.5164	34.0497	20.0556	30.1836	553.645	451.78	0	225.492	1.7135	2.68601	605.014	443.68	0.9611	70.9294	0	118.406	125.423	29.0721	47.9894	37.0176	26.0864
	197.283	1013.78	177.759	1.0241	2.68725	29.5164	34.0497	20.0556	30.1836	553.645	451.78	0	225.492	1.7135	2.68601	605.014	443.68	0.9611	70.9294	0	118.406	126.117	31.9472	62.7948	37.2516	30.2574
	197.283	912.4	177.759	1.0241	2.68725	29.5164	34.0497	20.0556	30.1836	553.645	451.78	0	225.492	1.7135	2.68601	605.014	443.68	0.9611	70.9294	0	118.406	126.873	35.0825	80.8017	37.4946	35.134
	197.283	821.16	177.759	1.0241	2.68725	29.5164	34.0497	20.0556	30.1836	553.645	451.78	0	225.492	1.7135	2.68601	605.014	443.68	0.9611	70.9294	0	118.406	127.698	38.4967	102.134	37.7495	40.7651
	197.283	739.044	177.759	1.0241	2.68725	29.5164	34.0497	20.0556	30.1836	553.645	451.78	0	225.492	1.7135	2.68601	605.014	443.68	0.9611	70.9294	0	118.406	128.593	42.2089	126.647	38.0222	47.1584
	197.283	665.14	177.759	1.0241	2.68725	29.5164	34.0497	20.0556	30.1836	553.645	451.78	0	225.492	1.7135	2.68601	605.014	443.68	0.9611	70.9294	0	118.406	129.566	46.2382	153.855	38.3224	54.2634
	197.283	598.626	177.759	1.0241	2.68725	29.5164	34.0497	20.0556	30.1836	553.645	451.78	0	225.492	1.7135	2.68601	605.014	443.68	0.9611	70.9294	0	118.406	130.62	50.6036	182.92	38.6638	61.9639
	197.283	538.763	177.759	1.0241	2.68725	29.5164	34.0497	20.0556	30.1836	553.645	451.78	0	225.492	1.7135	2.68601	605.014	443.68	0.9611	70.9294	0	118.406	131.759	55.3238	212.713	39.0632	70.0821
	197.283	484.887	177.759	1.0241	2.68725	29.5164	34.0497	20.0556	30.1836	553.645	451.78	0	225.492	1.7135	2.68601	605.014	443.68	0.9611	70.9294	0	118.406	132.988	60.4167	241.965	39.5392	78.3999
	197.283	436.398	177.759	1.0241	2.68725	29.5164	34.0497	20.0556	30.1836	553.645	451.78	0	225.492	1.7135	2.68601	605.014	443.68	0.9611	70.9294	0	118.406	134.311	65.8988	269.458	40.1105	86.6902
	197.283	392.758	177.759	1.0241	2.68725	29.5164	34.0497	20.0556	30.1836	553.645	451.78	0	225.492	1.7135	2.68601	605.014	443.68	0.9611	70.9294	0	118.406	135.732	71.7852	294.194	40.7936	94.7508
	197.283	353.483	177.759	1.0241	2.68725	29.5164	34.0497	20.0556	30.1836	553.645	451.78	0	225.492	1.7135	2.68601	605.014	443.68	0.9611	70.9294	0	118.406	137.253	78.0887	315.51	41.6022	102.429
	197.283	318.134	177.759	1.0241	2.68725	29.5164	34.0497	20.0556	30.1836	553.645	451.78	0	225.492	1.7135	2.68601	605.014	443.68	0.9611	70.9294	0	118.406	138.878	84.8194	333.094	42.5464	109.632
	197.283	286.321	177.759	1.0241	2.68725	29.5164	34.0497	20.0556	30.1836	553.645	451.78	0	225.492	1.7135	2.68601	605.014	443.68	0.9611	70.9294	0	118.406	140.607	91.9844	346.943	43.6339	116.321
	197.283	257.689	177.759	1.0241	2.68725	29.5164	34.0497	20.0556	30.1836	553.645	451.78	0	225.492	1.7135	2.68601	605.014	443.68	0.9611	70.9294	0	118.406	142.442	99.5866	357.272	44.8699	122.502
	197.283	231.92	177.759	1.0241	2.68725	29.5164	34.0497	20.0556	30.1836	553.645	451.78	0	225.492	1.7135	2.68601	605.014	443.68	0.9611	70.9294	0	118.406	144.382	107.625	364.426	46.2584	128.205
	197.283	208.728	177.759	1.0241	2.68725	29.5164	34.0497	20.0556	30.1836	553.645	451.78	0	225.492	1.7135	2.68601	605.014	443.68	0.9611	70.9294	0	118.406	146.426	116.093	368.8	47.803	133.472
	197.283	187.855	177.759	1.0241	2.68725	29.5164	34.0497	20.0556	30.1836	553.645	451.78	0	225.492	1.7135	2.68601	605.014	443.68	0.9611	70.9294	0	118.406	148.571	124.98	370.787	49.5067	138.345
	197.283	169.07	177.759	1.0241	2.68725	29.5164	34.0497	20.0556	30.1836	553.645	451.78	0	225.492	1.7135	2.68601	605.014	443.68	0.9611	70.9294	0	118.406	150.813	134.268	370.746	51.3726	142.864
	197.283	152.163	177.759	1.0241	2.68725	29.5164	34.0497	20.0556	30.1836	553.645	451.78	0	225.492	1.7135	2.68601	605.014	443.68	0.9611	70.9294	0	118.406	153.146	143.934	368.988	53.4037	147.055
	197.283	136.946	177.759	1.0241	2.68725	29.5164	34.0497	20.0556	30.1836	553.645	451.78	0	225.492	1.7135	2.68601	605.014	443.68	0.9611	70.9294	0	118.406	155.563	153.951	365.771	55.6025	150.941
	197.283	123.252	177.759	1.0241	2.68725	29.5164	34.0497	20.0556	30.1836	553.645	451.78	0	225.492	1.7135	2.68601	605.014	443.68	0.9611	70.9294	0	118.406	158.057	164.282	361.306	57.971	154.531
	197.283	110.927	177.759	1.0241	2.68725	29.5164	34.0497	20.0556	30.1836	553.645	451.78	0	225.492	1.7135	2.68601	605.014	443.68	0.9611	70.9294	0	118.406	160.617	174.888	355.762	60.5103	157.835
	197.283	99.8339	177.759	1.0241	2.68725	29.5164	34.0497	20.0556	30.1836	553.645	451.78	0	225.492	1.7135	2.68601	605.014	443.68	0.9611	70.9294	0	118.406	163.232	185.724	349.275	63.22	160.852
	197.283	89.8505	177.759	1.0241	2.68725	29.5164	34.0497	20.0556	30.1836	553.645	451.78	0	225.492	1.7135	2.68601	605.014	443.68	0.9611	70.9294	0	118.406	165.891	196.74	341.957	66.0985	163.585
	197.283	80.8655	177.759	1.0241	2.68725	29.5164	34.0497	20.0556	30.1836	553.645	451.78	0	225.492	1.7135	2.68601	605.014	443.68	0.9611	70.9294	0	118.406	168.58	207.882	333.899	69.142	166.036
	197.283	72.7789	177.759	1.0241	2.68725	29.5164	34.0497	20.0556	30.1836	553.645	451.78	0	225.492	1.7135	2.68601	605.014	443.68	0.9611	70.9294	0	118.406	171.287	219.096	325.181	72.3446	168.205
	197.283	65.501	177.759	1.0241	2.68725	29.5164	34.0497	20.0556	30.1836	553.645	451.78	0	225.492	1.7135	2.68601	605.014	443.68	0.9611	70.9294	0	118.406	173.996	230.323	315.874	75.6983	170.101
	197.283	58.9509	177.759	1.0241	2.68725	29.5164	34.0497	20.0556	30.1836	553.645	451.78	0	225.492	1.7135	2.68601	605.014	443.68	0.9611	70.9294	0	118.406	176.696	241.508	306.045	79.1926	171.731
	197.283	53.0558	177.759	1.0241	2.68725	29.5164	34.0497	20.0556	30.1836	553.645	451.78	0	225.492	1.7135	2.68601	605.014	443.68	0.9611	70.9294	0	118.406	179.371	252.592	295.759	82.8144	173.108
	197.283	47.7502	177.759	1.0241	2.68725	29.5164	34.0497	20.0556	30.1836	553.645	451.78	0	225.492	1.7135	2.68601	605.014	443.68	0.9611	70.9294	0	118.406	182.009	263.522	285.082	86.5484	174.25
	197.283	42.9752	177.759	1.0241	2.68725	29.5164	34.0497	20.0556	30.1836	553.645	451.78	0	225.492	1.7135	2.68601	605.014	443.68	0.9611	70.9294	0	118.406	184.598	274.247	274.082	90.3769	175.175
	197.283	38.6777	177.759	1.0241	2.68725	29.5164	34.0497	20.0556	30.1836	553.645	451.78	0	225.492	1.7135	2.68601	605.014	443.68	0.9611	70.9294	0	118.406	187.125	284.718	262.826	94.2804	175.904
	197.283	34.8099	177.759	1.0241	2.68725	29.5164	34.0497	20.0556	30.1836	553.645	451.78	0	225.492	1.7135	2.68601	605.014	443.68	0.9611	70.9294	0	118.406	189.581	294.892	251.386	98.2377	176.462
	197.283	31.3289	177.759	1.0241	2.68725	29.5164	34.0497	20.0556	30.1836	553.645	451.78	0	225.492	1.7135	2.68601	605.014	443.68	0.9611	70.9294	0	118.406	191.956	304.734	239.833	102.226	176.871
	197.283	28.196	177.759	1.0241	2.68725	29.5164	34.0497	20.0556	30.1836	553.645	451.78	0	225.492	1.7135	2.68601	605.014	443.68	0.9611	70.9294	0	118.406	194.243	314.21	228.24	106.224	177.155
	197.283	25.3764	177.759	1.0241	2.68725	29.5164	34.0497	20.0556	30.1836	553.645	451.78	0	225.492	1.7135	2.68601	605.014	443.68	0.9611	70.9294	0	118.406	196.436	323.296	216.679	110.206	177.337
	197.283	22.8388	177.759	1.0241	2.68725	29.5164	34.0497	20.0556	30.1836	553.645	451.78	0	225.492	1.7135	2.68601	605.014	443.68	0.9611	70.9294	0	118.406	198.53	331.97	205.219	114.15	177.438
	197.283	20.5549	177.759	1.0241	2.68725	29.5164	34.0497	20.0556	30.1836	553.645	451.78	0	225.492	1.7135	2.68601	605.014	443.68	0.9611	70.9294	0	118.406	200.521	340.219	193.926	118.035	177.477
	197.283	18.4994	177.759	1.0241	2.68725	29.5164	34.0497	20.0556	30.1836	553.645	451.78	0	225.492	1.7135	2.68601	605.014	443.68	0.9611	70.9294	0	118.406	202.407	348.035	182.863	121.839	177.469
	197.283	16.6495	177.759	1.0241	2.68725	29.5164	34.0497	20.0556	30.1836	553.645	451.78	0	225.492	1.7135	2.68601	605.014	443.68	0.9611	70.9294	0	118.406	204.188	355.414	172.085	125.544	177.43
	197.283	14.9845	177.759	1.0241	2.68725	29.5164	34.0497	20.0556	30.1836	553.645	451.78	0	225.492	1.7135	2.68601	605.014	443.68	0.9611	70.9294	0	118.406	205.863	362.356	161.642	129.133	177.371
	197.283	13.4861	177.759	1.0241	2.68725	29.5164	34.0497	20.0556	30.1836	553.645	451.78	0	225.492	1.7135	2.68601	605.014	443.68	0.9611	70.9294	0	118.406	207.435	368.867	151.578	132.591	177.3
	197.283	12.1375	177.759	1.0241	2.68725	29.5164	34.0497	20.0556	30.1836	553.645	451.78	0	225.492	1.7135	2.68601	605.014	443.68	0.9611	70.9294	0	118.406	208.905	374.956	141.927	135.907	177.226
	197.283	10.9237	177.759	1.0241	2.68725	29.5164	34.0497	20.0556	30.1836	553.645	451.78	0	225.492	1.7135	2.68601	605.014	443.68	0.9611	70.9294	0	118.406	210.275	380.634	132.717	139.07	177.154
	197.283	9.83135	177.759	1.0241	2.68725	29.5164	34.0497	20.0556	30.1836	553.645	451.78	0	225.492	1.7135	2.68601	605.014	443.68	0.9611	70.9294	0	118.406	211.55	385.915	123.97	142.075	177.087
	197.283	8.84822	177.759	1.0241	2.68725	29.5164	34.0497	20.0556	30.1836	553.645	451.78	0	225.492	1.7135	2.68601	605.014	443.68	0.9611	70.9294	0	118.406	212.732	390.815	115.698	144.916	177.028
	197.283	7.9634	177.759	1.0241	2.68725	29.5164	34.0497	20.0556	30.1836	553.645	451.78	0	225.492	1.7135	2.68601	605.014	443.68	0.9611	70.9294	0	118.406	213.827	395.352	107.907	147.592	176.977
	197.283	7.16706	177.759	1.0241	2.68725	29.5164	34.0497	20.0556	30.1836	553.645	451.78	0	225.492	1.7135	2.68601	605.014	443.68	0.9611	70.9294	0	118.406	214.839	399.543	100.599	150.102	176.936
	197.283	6.45035	177.759	1.0241	2.68725	29.5164	34.0497	20.0556	30.1836	553.645	451.78	0	225.492	1.7135	2.68601	605.014	443.68	0.9611	70.9294	0	118.406	215.772	403.407	93.7677	152.448	176.904
	197.283	5.80532	177.759	1.0241	2.68725	29.5164	34.0497	20.0556	30.1836	553.645	451.78	0	225.492	1.7135	2.68601	605.014	443.68	0.9611	70.9294	0	118.406	216.63	406.965	87.4049	154.633	176.882
	197.283	5.22478	177.759	1.0241	2.68725	29.5164	34.0497	20.0556	30.1836	553.645	451.78	0	225.492	1.7135	2.68601	605.014	443.68	0.9611	70.9294	0	118.406	217.419	410.234	81.497	156.661	176.867
	197.283	4.70231	177.759	1.0241	2.68725	29.5164	34.0497	20.0556	30.1836	553.645	451.78	0	225.492	1.7135	2.68601	605.014	443.68	0.9611	70.9294	0	118.406	218.143	413.234	76.0277	158.54	176.86
	197.283	4.23207	177.759	1.0241	2.68725	29.5164	34.0497	20.0556	30.1836	553.645	451.78	0	225.492	1.7135	2.68601	605.014	443.68	0.9611	70.9294	0	118.406	218.807	415.983	70.9782	160.273	176.859
	197.283	3.80887	177.759	1.0241	2.68725	29.5164	34.0497	20.0556	30.1836	553.645	451.78	0	225.492	1.7135	2.68601	605.014	443.68	0.9611	70.9294	0	118.406	219.414	418.499	66.3281	161.87	176.864
	197.283	3.42798	177.759	1.0241	2.68725	29.5164	34.0497	20.0556	30.1836	553.645	451.78	0	225.492	1.7135	2.68601	605.014	443.68	0.9611	70.9294	0	118.406	219.969	420.799	62.0558	163.337	176.873
	197.283	3.08518	177.759	1.0241	2.68725	29.5164	34.0497	20.0556	30.1836	553.645	451.78	0	225.492	1.7135	2.68601	605.014	443.68	0.9611	70.9294	0	118.406	220.476	422.899	58.139	164.682	176.886
	197.283	2.77666	177.759	1.0241	2.68725	29.5164	34.0497	20.0556	30.1836	553.645	451.78	0	225.492	1.7135	2.68601	605.014	443.68	0.9611	70.9294	0	118.406	220.939	424.815	54.555	165.913	176.901
	197.283	2.499	177.759	1.0241	2.68725	29.5164	34.0497	20.0556	30.1836	553.645	451.78	0	225.492	1.7135	2.68601	605.014	443.68	0.9611	70.9294	0	118.406	221.36	426.562	51.2816	167.037	176.919
	197.283	2.2491	177.759	1.0241	2.68725	29.5164	34.0497	20.0556	30.1836	553.645	451.78	0	225.492	1.7135	2.68601	605.014	443.68	0.9611	70.9294	0	118.406	221.744	428.153	48.2967	168.062	176.938
	197.283	2.02419	177.759	1.0241	2.68725	29.5164	34.0497	20.0556	30.1836	553.645	451.78	0	225.492	1.7135	2.68601	605.014	443.68	0.9611	70.9294	0	118.406	222.094	429.601	45.579	168.995	176.958
	197.283	1.82177	177.759	1.0241	2.68725	29.5164	34.0497	20.0556	30.1836	553.645	451.78	0	225.492	1.7135	2.68601	605.014	443.68	0.9611	70.9294	0	118.406	222.411	430.917	43.1078	169.844	176.979
	197.283	1.63959	177.759	1.0241	2.68725	29.5164	34.0497	20.0556	30.1836	553.645	451.78	0	225.492	1.7135	2.68601	605.014	443.68	0.9611	70.9294	0	118.406	222.7	432.115	40.8636	170.614	177
	197.283	1.47563	177.759	1.0241	2.68725	29.5164	34.0497	20.0556	30.1836	553.645	451.78	0	225.492	1.7135	2.68601	605.014	443.68	0.9611	70.9294	0	118.406	222.963	433.202	38.8279	171.313	177.021
	197.283	1.32807	177.759	1.0241	2.68725	29.5164	34.0497	20.0556	30.1836	553.645	451.78	0	225.492	1.7135	2.68601	605.014	443.68	0.9611	70.9294	0	118.406	223.201	434.189	36.9831	171.947	177.042
	197.283	1.19526	177.759	1.0241	2.68725	29.5164	34.0497	20.0556	30.1836	553.645	451.78	0	225.492	1.7135	2.68601	605.014	443.68	0.9611	70.9294	0	118.406	223.417	435.086	35.3129	172.52	177.062
	197.283	1.07574	177.759	1.0241	2.68725	29.5164	34.0497	20.0556	30.1836	553.645	451.78	0	225.492	1.7135	2.68601	605.014	443.68	0.9611	70.9294	0	118.406	223.614	435.899	33.8021	173.039	177.082
	197.283	0.968163	177.759	1.0241	2.68725	29.5164	34.0497	20.0556	30.1836	553.645	451.78	0	225.492	1.7135	2.68601	605.014	443.68	0.9611	70.9294	0	118.406	223.792	436.636	32.4364	173.508	177.101
	197.283	0.871347	177.759	1.0241	2.68725	29.5164	34.0497	20.0556	30.1836	553.645	451.78	0	225.492	1.7135	2.68601	605.014	443.68	0.9611	70.9294	0	118.406	223.953	437.305	31.2027	173.932	177.119
	197.283	0.784212	177.759	1.0241	2.68725	29.5164	34.0497	20.0556	30.1836	553.645	451.78	0	225.492	1.7135	2.68601	605.014	443.68	0.9611	70.9294	0	118.406	224.099	437.911	30.0891	174.314	177.136
	197.283	0.705791	177.759	1.0241	2.68725	29.5164	34.0497	20.0556	30.1836	553.645	451.78	0	225.492	1.7135	2.68601	605.014	443.68	0.9611	70.9294	0	118.406	224.232	438.46	29.0843	174.659	177.153
	197.283	0.635212	177.759	1.0241	2.68725	29.5164	34.0497	20.0556	30.1836	553.645	451.78	0	225.492	1.7135	2.68601	605.014	443.68	0.9611	70.9294	0	118.406	224.352	438.957	28.1782	174.97	177.168
	197.283	0.571691	177.759	1.0241	2.68725	29.5164	34.0497	20.0556	30.1836	553.645	451.78	0	225.492	1.7135	2.68601	605.014	443.68	0.9611	70.9294	0	118.406	224.46	439.408	27.3615	175.251	177.183
	197.283	0.514522	177.759	1.0241	2.68725	29.5164	34.0497	20.0556	30.1836	553.645	451.78	0	225.492	1.7135	2.68601	605.014	443.68	0.9611	70.9294	0	118.406	224.559	439.815	26.6256	175.503	177.197
	197.283	0.463069	177.759	1.0241	2.68725	29.5164	34.0497	20.0556	30.1836	553.645	451.78	0	225.492	1.7135	2.68601	605.014	443.68	0.9611	70.9294	0	118.406	224.648	440.185	25.9628	175.731	177.209
	197.283	0.416762	177.759	1.0241	2.68725	29.5164	34.0497	20.0556	30.1836	553.645	451.78	0	225.492	1.7135	2.68601	605.014	443.68	0.9611	70.9294	0	118.406	224.729	440.519	25.366	175.936	177.222
	197.283	0.375086	177.759	1.0241	2.68725	29.5164	34.0497	20.0556	30.1836	553.645	451.78	0	225.492	1.7135	2.68601	605.014	443.68	0.9611	70.9294	0	118.406	224.802	440.821	24.8289	176.12	177.233
	197.283	0.337578	177.759	1.0241	2.68725	29.5164	34.0497	20.0556	30.1836	553.645	451.78	0	225.492	1.7135	2.68601	605.014	443.68	0.9611	70.9294	0	118.406	224.868	441.095	24.3455	176.286	177.244
	197.283	0.30382	177.759	1.0241	2.68725	29.5164	34.0497	20.0556	30.1836	553.645	451.78	0	225.492	1.7135	2.68601	605.014	443.68	0.9611	70.9294	0	118.406	224.928	441.343	23.9106	176.436	177.253
	197.283	0.273438	177.759	1.0241	2.68725	29.5164	34.0497	20.0556	30.1836	553.645	451.78	0	225.492	1.7135	2.68601	605.014	443.68	0.9611	70.9294	0	118.406	224.982	441.567	23.5195	176.57	177.263
	197.283	0.246094	177.759	1.0241	2.68725	29.5164	34.0497	20.0556	30.1836	553.645	451.78	0	225.492	1.7135	2.68601	605.014	443.68	0.9611	70.9294	0	118.406	225.03	441.769	23.1678	176.691	177.271
	197.283	0.221485	177.759	1.0241	2.68725	29.5164	34.0497	20.0556	30.1836	553.645	451.78	0	225.492	1.7135	2.68601	605.014	443.68	0.9611	70.9294	0	118.406	225.075	441.952	22.8515	176.799	177.279
	197.283	0.199336	177.759	1.0241	2.68725	29.5164	34.0497	20.0556	30.1836	553.645	451.78	0	225.492	1.7135	2.68601	605.014	443.68	0.9611	70.9294	0	118.406	225.115	442.118	22.5672	176.897	177.287
	197.283	0.179403	177.759	1.0241	2.68725	29.5164	34.0497	20.0556	30.1836	553.645	451.78	0	225.492	1.7135	2.68601	605.014	443.68	0.9611	70.9294	0	118.406	225.151	442.268	22.3117	176.985	177.293
	197.283	0.161462	177.759	1.0241	2.68725	29.5164	34.0497	20.0556	30.1836	553.645	451.78	0	225.492	1.7135	2.68601	605.014	443.68	0.9611	70.9294	0	118.406	225.184	442.404	22.082	177.063	177.3
	197.283	0.145316	177.759	1.0241	2.68725	29.5164	34.0497	20.0556	30.1836	553.645	451.78	0	225.492	1.7135	2.68601	605.014	443.68	0.9611	70.9294	0	118.406	225.213	442.526	21.8756	177.134	177.305
	197.283	0.130784	177.759	1.0241	2.68725	29.5164	34.0497	20.0556	30.1836	553.645	451.78	0	225.492	1.7135	2.68601	605.014	443.68	0.9611	70.9294	0	118.406	225.24	442.637	21.6902	177.198	177.311
	197.283	0.117706	177.759	1.0241	2.68725	29.5164	34.0497	20.0556	30.1836	553.645	451.78	0	225.492	1.7135	2.68601	605.014	443.68	0.9611	70.9294	0	118.406	225.264	442.737	21.5235	177.255	177.316

## Sheet: s92
			K1	Hilli1 x	Hill2 x	K1is	K1ii	V1	Kx1	Kx2	V1is	V1ii	K2	Hill1	Hill2	K3	V2	Hill xx	Kxx1	V2i	K2i
		42.2831	177.759	1.0241	2.68725	29.5164	34.0497	20.0556	30.1836	553.645	451.78	0	225.492	1.7135	2.68601	605.014	443.68	0.9611	70.9294	0	118.406
	S	I	K1	Hilli1 x	Hill2 x	K1is	K1ii	V1	Kx1	Kx2	V1is	V1ii	K2	Hill1	Hill2	K3	V2	Hill xx	Kxx1	V2i	K2i	K2 term	V2 term	V1 term	K1 term	cal	obs
42.2831	134.283	0.33	177.759	1.0241	2.68725	29.5164	34.0497	20.0556	30.1836	553.645	451.78	0	225.492	1.7135	2.68601	605.014	443.68	0.9611	70.9294	0	118.406	224.881	441.15	24.2479	176.32	124.802	120.407	4.39432
	134.283	1	177.759	1.0241	2.68725	29.5164	34.0497	20.0556	30.1836	553.645	451.78	0	225.492	1.7135	2.68601	605.014	443.68	0.9611	70.9294	0	118.406	223.739	436.417	32.8411	173.369	125.567	121.78	3.78729
	134.283	3.33	177.759	1.0241	2.68725	29.5164	34.0497	20.0556	30.1836	553.645	451.78	0	225.492	1.7135	2.68601	605.014	443.68	0.9611	70.9294	0	118.406	220.113	421.396	60.9432	163.719	128.371	122.302	6.06936
	134.283	6.66	177.759	1.0241	2.68725	29.5164	34.0497	20.0556	30.1836	553.645	451.78	0	225.492	1.7135	2.68601	605.014	443.68	0.9611	70.9294	0	118.406	215.496	402.268	95.7914	151.753	132.366	129.86	2.50669
	134.283	10	177.759	1.0241	2.68725	29.5164	34.0497	20.0556	30.1836	553.645	451.78	0	225.492	1.7135	2.68601	605.014	443.68	0.9611	70.9294	0	118.406	211.35	385.089	125.35	141.601	136.173	134.842	1.33143
	134.283	21	177.759	1.0241	2.68725	29.5164	34.0497	20.0556	30.1836	553.645	451.78	0	225.492	1.7135	2.68601	605.014	443.68	0.9611	70.9294	0	118.406	200.124	338.577	196.206	117.251	146.667	144.065	2.60204
	134.283	33.3	177.759	1.0241	2.68725	29.5164	34.0497	20.0556	30.1836	553.645	451.78	0	225.492	1.7135	2.68601	605.014	443.68	0.9611	70.9294	0	118.406	190.591	299.077	246.533	99.914	154.819	151.059	3.76035
	134.283	45	177.759	1.0241	2.68725	29.5164	34.0497	20.0556	30.1836	553.645	451.78	0	225.492	1.7135	2.68601	605.014	443.68	0.9611	70.9294	0	118.406	183.473	269.589	278.924	88.6935	159.881	163.857	3.97641
	134.283	66.6	177.759	1.0241	2.68725	29.5164	34.0497	20.0556	30.1836	553.645	451.78	0	225.492	1.7135	2.68601	605.014	443.68	0.9611	70.9294	0	118.406	173.569	228.552	317.38	75.1591	164.744	176.421	11.6774
	134.283	100	177.759	1.0241	2.68725	29.5164	34.0497	20.0556	30.1836	553.645	451.78	0	225.492	1.7135	2.68601	605.014	443.68	0.9611	70.9294	0	118.406	163.19	185.551	349.384	63.176	166.043	181.781	15.7378
	134.283	333	177.759	1.0241	2.68725	29.5164	34.0497	20.0556	30.1836	553.645	451.78	0	225.492	1.7135	2.68601	605.014	443.68	0.9611	70.9294	0	118.406	138.161	81.849	325.937	42.1199	127.634	124.604	3.03015
	134.283	450	177.759	1.0241	2.68725	29.5164	34.0497	20.0556	30.1836	553.645	451.78	0	225.492	1.7135	2.68601	605.014	443.68	0.9611	70.9294	0	118.406	133.916	64.2607	261.695	39.9332	101.654	122.498	20.8446
	134.283	666	177.759	1.0241	2.68725	29.5164	34.0497	20.0556	30.1836	553.645	451.78	0	225.492	1.7135	2.68601	605.014	443.68	0.9611	70.9294	0	118.406	129.554	46.1867	153.508	38.3185	63.3238	85.2576	21.9338
	134.283	800	177.759	1.0241	2.68725	29.5164	34.0497	20.0556	30.1836	553.645	451.78	0	225.492	1.7135	2.68601	605.014	443.68	0.9611	70.9294	0	118.406	127.913	39.388	107.924	37.8151	47.8369	61.6338	13.7969
	134.283	1000	177.759	1.0241	2.68725	29.5164	34.0497	20.0556	30.1836	553.645	451.78	0	225.492	1.7135	2.68601	605.014	443.68	0.9611	70.9294	0	118.406	126.211	32.3393	64.9478	37.2826	33.1073	19.1617	13.9456
	134.283	1800	177.759	1.0241	2.68725	29.5164	34.0497	20.0556	30.1836	553.645	451.78	0	225.492	1.7135	2.68601	605.014	443.68	0.9611	70.9294	0	118.406	122.987	18.9788	11.7789	36.0856	12.8273	8.10916	4.71819
	134.283	3333	177.759	1.0241	2.68725	29.5164	34.0497	20.0556	30.1836	553.645	451.78	0	225.492	1.7135	2.68601	605.014	443.68	0.9611	70.9294	0	118.406	120.989	10.7028	0.13867	35.2026	5.67794	8.82756	3.14962
	134.283	6666	177.759	1.0241	2.68725	29.5164	34.0497	20.0556	30.1836	553.645	451.78	0	225.492	1.7135	2.68601	605.014	443.68	0.9611	70.9294	0	118.406	119.749	5.56291	-1.14668	34.6311	2.67552	-2.20989	4.88541
	134.283	10000	177.759	1.0241	2.68725	29.5164	34.0497	20.0556	30.1836	553.645	451.78	0	225.492	1.7135	2.68601	605.014	443.68	0.9611	70.9294	0	118.406	119.319	3.78251	-0.94061	34.4359	1.78596	-0.83753	2.62349
	134.283	21000	177.759	1.0241	2.68725	29.5164	34.0497	20.0556	30.1836	553.645	451.78	0	225.492	1.7135	2.68601	605.014	443.68	0.9611	70.9294	0	118.406	118.855	1.86203	-0.503516	34.2312	0.872664	-0.44512	1.31778
	134.283	33000	177.759	1.0241	2.68725	29.5164	34.0497	20.0556	30.1836	553.645	451.78	0	225.492	1.7135	2.68601	605.014	443.68	0.9611	70.9294	0	118.406	118.698	1.20773	-0.325684	34.1641	0.567	-0.16055	0.72755
	134.283	100000	177.759	1.0241	2.68725	29.5164	34.0497	20.0556	30.1836	553.645	451.78	0	225.492	1.7135	2.68601	605.014	443.68	0.9611	70.9294	0	118.406	118.507	0.41686	-0.10677	34.0865	0.197403	-0.0615	0.258903
																												147.075
	134.283	50000	177.759	1.0241	2.68725	29.5164	34.0497	20.0556	30.1836	553.645	451.78	0	225.492	1.7135	2.68601	605.014	443.68	0.9611	70.9294	0	118.406	118.602	0.810819	-0.215366	34.1245	0.381773
	134.283	45000	177.759	1.0241	2.68725	29.5164	34.0497	20.0556	30.1836	553.645	451.78	0	225.492	1.7135	2.68601	605.014	443.68	0.9611	70.9294	0	118.406	118.623	0.897051	-0.239354	34.133	0.422035
	134.283	40500	177.759	1.0241	2.68725	29.5164	34.0497	20.0556	30.1836	553.645	451.78	0	225.492	1.7135	2.68601	605.014	443.68	0.9611	70.9294	0	118.406	118.646	0.992432	-0.265898	34.1425	0.46655
	134.283	36450	177.759	1.0241	2.68725	29.5164	34.0497	20.0556	30.1836	553.645	451.78	0	225.492	1.7135	2.68601	605.014	443.68	0.9611	70.9294	0	118.406	118.671	1.09793	-0.295229	34.153	0.515773
	134.283	32805	177.759	1.0241	2.68725	29.5164	34.0497	20.0556	30.1836	553.645	451.78	0	225.492	1.7135	2.68601	605.014	443.68	0.9611	70.9294	0	118.406	118.699	1.21461	-0.327589	34.1648	0.57021
	134.283	29524.5	177.759	1.0241	2.68725	29.5164	34.0497	20.0556	30.1836	553.645	451.78	0	225.492	1.7135	2.68601	605.014	443.68	0.9611	70.9294	0	118.406	118.73	1.34366	-0.363219	34.1779	0.630422
	134.283	26572	177.759	1.0241	2.68725	29.5164	34.0497	20.0556	30.1836	553.645	451.78	0	225.492	1.7135	2.68601	605.014	443.68	0.9611	70.9294	0	118.406	118.765	1.48637	-0.402358	34.1925	0.697037
	134.283	23914.8	177.759	1.0241	2.68725	29.5164	34.0497	20.0556	30.1836	553.645	451.78	0	225.492	1.7135	2.68601	605.014	443.68	0.9611	70.9294	0	118.406	118.803	1.64418	-0.445225	34.2087	0.770756
	134.283	21523.4	177.759	1.0241	2.68725	29.5164	34.0497	20.0556	30.1836	553.645	451.78	0	225.492	1.7135	2.68601	605.014	443.68	0.9611	70.9294	0	118.406	118.845	1.81867	-0.492006	34.2267	0.852366
	134.283	19371	177.759	1.0241	2.68725	29.5164	34.0497	20.0556	30.1836	553.645	451.78	0	225.492	1.7135	2.68601	605.014	443.68	0.9611	70.9294	0	118.406	118.892	2.0116	-0.542832	34.2468	0.942751
	134.283	17433.9	177.759	1.0241	2.68725	29.5164	34.0497	20.0556	30.1836	553.645	451.78	0	225.492	1.7135	2.68601	605.014	443.68	0.9611	70.9294	0	118.406	118.943	2.2249	-0.597743	34.2692	1.04291
	134.283	15690.5	177.759	1.0241	2.68725	29.5164	34.0497	20.0556	30.1836	553.645	451.78	0	225.492	1.7135	2.68601	605.014	443.68	0.9611	70.9294	0	118.406	119	2.46068	-0.656651	34.294	1.15396
	134.283	14121.5	177.759	1.0241	2.68725	29.5164	34.0497	20.0556	30.1836	553.645	451.78	0	225.492	1.7135	2.68601	605.014	443.68	0.9611	70.9294	0	118.406	119.063	2.7213	-0.719271	34.3217	1.2772
	134.283	12709.3	177.759	1.0241	2.68725	29.5164	34.0497	20.0556	30.1836	553.645	451.78	0	225.492	1.7135	2.68601	605.014	443.68	0.9611	70.9294	0	118.406	119.132	3.00933	-0.785049	34.3524	1.4141
	134.283	11438.4	177.759	1.0241	2.68725	29.5164	34.0497	20.0556	30.1836	553.645	451.78	0	225.492	1.7135	2.68601	605.014	443.68	0.9611	70.9294	0	118.406	119.209	3.32762	-0.853049	34.3866	1.56634
	134.283	10294.6	177.759	1.0241	2.68725	29.5164	34.0497	20.0556	30.1836	553.645	451.78	0	225.492	1.7135	2.68601	605.014	443.68	0.9611	70.9294	0	118.406	119.294	3.6793	-0.921804	34.4247	1.7359
	134.283	9265.1	177.759	1.0241	2.68725	29.5164	34.0497	20.0556	30.1836	553.645	451.78	0	225.492	1.7135	2.68601	605.014	443.68	0.9611	70.9294	0	118.406	119.388	4.06779	-0.989121	34.4669	1.92508
	134.283	8338.59	177.759	1.0241	2.68725	29.5164	34.0497	20.0556	30.1836	553.645	451.78	0	225.492	1.7135	2.68601	605.014	443.68	0.9611	70.9294	0	118.406	119.491	4.49689	-1.05182	34.5138	2.13656
	134.283	7504.73	177.759	1.0241	2.68725	29.5164	34.0497	20.0556	30.1836	553.645	451.78	0	225.492	1.7135	2.68601	605.014	443.68	0.9611	70.9294	0	118.406	119.606	4.97074	-1.10536	34.5658	2.37358
	134.283	6754.26	177.759	1.0241	2.68725	29.5164	34.0497	20.0556	30.1836	553.645	451.78	0	225.492	1.7135	2.68601	605.014	443.68	0.9611	70.9294	0	118.406	119.732	5.49389	-1.14342	34.6235	2.63998
	134.283	6078.83	177.759	1.0241	2.68725	29.5164	34.0497	20.0556	30.1836	553.645	451.78	0	225.492	1.7135	2.68601	605.014	443.68	0.9611	70.9294	0	118.406	119.871	6.07135	-1.15721	34.6874	2.94041
	134.283	5470.95	177.759	1.0241	2.68725	29.5164	34.0497	20.0556	30.1836	553.645	451.78	0	225.492	1.7135	2.68601	605.014	443.68	0.9611	70.9294	0	118.406	120.025	6.70856	-1.13472	34.7582	3.28058
	134.283	4923.85	177.759	1.0241	2.68725	29.5164	34.0497	20.0556	30.1836	553.645	451.78	0	225.492	1.7135	2.68601	605.014	443.68	0.9611	70.9294	0	118.406	120.195	7.41153	-1.05955	34.8364	3.66748
	134.283	4431.47	177.759	1.0241	2.68725	29.5164	34.0497	20.0556	30.1836	553.645	451.78	0	225.492	1.7135	2.68601	605.014	443.68	0.9611	70.9294	0	118.406	120.382	8.18678	-0.909593	34.9228	4.10979
	134.283	3988.32	177.759	1.0241	2.68725	29.5164	34.0497	20.0556	30.1836	553.645	451.78	0	225.492	1.7135	2.68601	605.014	443.68	0.9611	70.9294	0	118.406	120.588	9.04144	-0.655096	35.018	4.61836
	134.283	3589.49	177.759	1.0241	2.68725	29.5164	34.0497	20.0556	30.1836	553.645	451.78	0	225.492	1.7135	2.68601	605.014	443.68	0.9611	70.9294	0	118.406	120.816	9.98327	-0.256315	35.1228	5.20684
	134.283	3230.54	177.759	1.0241	2.68725	29.5164	34.0497	20.0556	30.1836	553.645	451.78	0	225.492	1.7135	2.68601	605.014	443.68	0.9611	70.9294	0	118.406	121.066	11.0207	0.339565	35.2377	5.89244
	134.283	2907.49	177.759	1.0241	2.68725	29.5164	34.0497	20.0556	30.1836	553.645	451.78	0	225.492	1.7135	2.68601	605.014	443.68	0.9611	70.9294	0	118.406	121.342	12.163	1.20229	35.3636	6.69697
	134.283	2616.74	177.759	1.0241	2.68725	29.5164	34.0497	20.0556	30.1836	553.645	451.78	0	225.492	1.7135	2.68601	605.014	443.68	0.9611	70.9294	0	118.406	121.645	13.4199	2.42333	35.5008	7.6481
	134.283	2355.06	177.759	1.0241	2.68725	29.5164	34.0497	20.0556	30.1836	553.645	451.78	0	225.492	1.7135	2.68601	605.014	443.68	0.9611	70.9294	0	118.406	121.979	14.8023	4.12159	35.65	8.78086
	134.283	2119.56	177.759	1.0241	2.68725	29.5164	34.0497	20.0556	30.1836	553.645	451.78	0	225.492	1.7135	2.68601	605.014	443.68	0.9611	70.9294	0	118.406	122.345	16.3217	6.45011	35.8113	10.1394
	134.283	1907.6	177.759	1.0241	2.68725	29.5164	34.0497	20.0556	30.1836	553.645	451.78	0	225.492	1.7135	2.68601	605.014	443.68	0.9611	70.9294	0	118.406	122.748	17.9906	9.60311	35.9848	11.7792
	134.283	1716.84	177.759	1.0241	2.68725	29.5164	34.0497	20.0556	30.1836	553.645	451.78	0	225.492	1.7135	2.68601	605.014	443.68	0.9611	70.9294	0	118.406	123.19	19.8221	13.8228	36.1703	13.7687
	134.283	1545.16	177.759	1.0241	2.68725	29.5164	34.0497	20.0556	30.1836	553.645	451.78	0	225.492	1.7135	2.68601	605.014	443.68	0.9611	70.9294	0	118.406	123.675	21.8305	19.4041	36.3672	16.1912
	134.283	1390.64	177.759	1.0241	2.68725	29.5164	34.0497	20.0556	30.1836	553.645	451.78	0	225.492	1.7135	2.68601	605.014	443.68	0.9611	70.9294	0	118.406	124.206	24.0309	26.6946	36.5747	19.1453
	134.283	1251.58	177.759	1.0241	2.68725	29.5164	34.0497	20.0556	30.1836	553.645	451.78	0	225.492	1.7135	2.68601	605.014	443.68	0.9611	70.9294	0	118.406	124.787	26.4392	36.0857	36.7918	22.7434
	134.283	1126.42	177.759	1.0241	2.68725	29.5164	34.0497	20.0556	30.1836	553.645	451.78	0	225.492	1.7135	2.68601	605.014	443.68	0.9611	70.9294	0	118.406	125.423	29.0721	47.9894	37.0176	27.1067
	134.283	1013.78	177.759	1.0241	2.68725	29.5164	34.0497	20.0556	30.1836	553.645	451.78	0	225.492	1.7135	2.68601	605.014	443.68	0.9611	70.9294	0	118.406	126.117	31.9472	62.7948	37.2516	32.3551
	134.283	912.4	177.759	1.0241	2.68725	29.5164	34.0497	20.0556	30.1836	553.645	451.78	0	225.492	1.7135	2.68601	605.014	443.68	0.9611	70.9294	0	118.406	126.873	35.0825	80.8017	37.4946	38.5897
	134.283	821.16	177.759	1.0241	2.68725	29.5164	34.0497	20.0556	30.1836	553.645	451.78	0	225.492	1.7135	2.68601	605.014	443.68	0.9611	70.9294	0	118.406	127.698	38.4967	102.134	37.7495	45.8703
	134.283	739.044	177.759	1.0241	2.68725	29.5164	34.0497	20.0556	30.1836	553.645	451.78	0	225.492	1.7135	2.68601	605.014	443.68	0.9611	70.9294	0	118.406	128.593	42.2089	126.647	38.0222	54.1882
	134.283	665.14	177.759	1.0241	2.68725	29.5164	34.0497	20.0556	30.1836	553.645	451.78	0	225.492	1.7135	2.68601	605.014	443.68	0.9611	70.9294	0	118.406	129.566	46.2382	153.855	38.3224	63.4423
	134.283	598.626	177.759	1.0241	2.68725	29.5164	34.0497	20.0556	30.1836	553.645	451.78	0	225.492	1.7135	2.68601	605.014	443.68	0.9611	70.9294	0	118.406	130.62	50.6036	182.92	38.6638	73.4286
	134.283	538.763	177.759	1.0241	2.68725	29.5164	34.0497	20.0556	30.1836	553.645	451.78	0	225.492	1.7135	2.68601	605.014	443.68	0.9611	70.9294	0	118.406	131.759	55.3238	212.713	39.0632	83.851
	134.283	484.887	177.759	1.0241	2.68725	29.5164	34.0497	20.0556	30.1836	553.645	451.78	0	225.492	1.7135	2.68601	605.014	443.68	0.9611	70.9294	0	118.406	132.988	60.4167	241.965	39.5392	94.3562
	134.283	436.398	177.759	1.0241	2.68725	29.5164	34.0497	20.0556	30.1836	553.645	451.78	0	225.492	1.7135	2.68601	605.014	443.68	0.9611	70.9294	0	118.406	134.311	65.8988	269.458	40.1105	104.585
	134.283	392.758	177.759	1.0241	2.68725	29.5164	34.0497	20.0556	30.1836	553.645	451.78	0	225.492	1.7135	2.68601	605.014	443.68	0.9611	70.9294	0	118.406	135.732	71.7852	294.194	40.7936	114.226
	134.283	353.483	177.759	1.0241	2.68725	29.5164	34.0497	20.0556	30.1836	553.645	451.78	0	225.492	1.7135	2.68601	605.014	443.68	0.9611	70.9294	0	118.406	137.253	78.0887	315.51	41.6022	123.051
	134.283	318.134	177.759	1.0241	2.68725	29.5164	34.0497	20.0556	30.1836	553.645	451.78	0	225.492	1.7135	2.68601	605.014	443.68	0.9611	70.9294	0	118.406	138.878	84.8194	333.094	42.5464	130.927
	134.283	286.321	177.759	1.0241	2.68725	29.5164	34.0497	20.0556	30.1836	553.645	451.78	0	225.492	1.7135	2.68601	605.014	443.68	0.9611	70.9294	0	118.406	140.607	91.9844	346.943	43.6339	137.814
	134.283	257.689	177.759	1.0241	2.68725	29.5164	34.0497	20.0556	30.1836	553.645	451.78	0	225.492	1.7135	2.68601	605.014	443.68	0.9611	70.9294	0	118.406	142.442	99.5866	357.272	44.8699	143.737
	134.283	231.92	177.759	1.0241	2.68725	29.5164	34.0497	20.0556	30.1836	553.645	451.78	0	225.492	1.7135	2.68601	605.014	443.68	0.9611	70.9294	0	118.406	144.382	107.625	364.426	46.2584	148.764
	134.283	208.728	177.759	1.0241	2.68725	29.5164	34.0497	20.0556	30.1836	553.645	451.78	0	225.492	1.7135	2.68601	605.014	443.68	0.9611	70.9294	0	118.406	146.426	116.093	368.8	47.803	152.979
	134.283	187.855	177.759	1.0241	2.68725	29.5164	34.0497	20.0556	30.1836	553.645	451.78	0	225.492	1.7135	2.68601	605.014	443.68	0.9611	70.9294	0	118.406	148.571	124.98	370.787	49.5067	156.472
	134.283	169.07	177.759	1.0241	2.68725	29.5164	34.0497	20.0556	30.1836	553.645	451.78	0	225.492	1.7135	2.68601	605.014	443.68	0.9611	70.9294	0	118.406	150.813	134.268	370.746	51.3726	159.325
	134.283	152.163	177.759	1.0241	2.68725	29.5164	34.0497	20.0556	30.1836	553.645	451.78	0	225.492	1.7135	2.68601	605.014	443.68	0.9611	70.9294	0	118.406	153.146	143.934	368.988	53.4037	161.608
	134.283	136.946	177.759	1.0241	2.68725	29.5164	34.0497	20.0556	30.1836	553.645	451.78	0	225.492	1.7135	2.68601	605.014	443.68	0.9611	70.9294	0	118.406	155.563	153.951	365.771	55.6025	163.379
	134.283	123.252	177.759	1.0241	2.68725	29.5164	34.0497	20.0556	30.1836	553.645	451.78	0	225.492	1.7135	2.68601	605.014	443.68	0.9611	70.9294	0	118.406	158.057	164.282	361.306	57.971	164.685
	134.283	110.927	177.759	1.0241	2.68725	29.5164	34.0497	20.0556	30.1836	553.645	451.78	0	225.492	1.7135	2.68601	605.014	443.68	0.9611	70.9294	0	118.406	160.617	174.888	355.762	60.5103	165.564
	134.283	99.8339	177.759	1.0241	2.68725	29.5164	34.0497	20.0556	30.1836	553.645	451.78	0	225.492	1.7135	2.68601	605.014	443.68	0.9611	70.9294	0	118.406	163.232	185.724	349.275	63.22	166.048
	134.283	89.8505	177.759	1.0241	2.68725	29.5164	34.0497	20.0556	30.1836	553.645	451.78	0	225.492	1.7135	2.68601	605.014	443.68	0.9611	70.9294	0	118.406	165.891	196.74	341.957	66.0985	166.165
	134.283	80.8655	177.759	1.0241	2.68725	29.5164	34.0497	20.0556	30.1836	553.645	451.78	0	225.492	1.7135	2.68601	605.014	443.68	0.9611	70.9294	0	118.406	168.58	207.882	333.899	69.142	165.944
	134.283	72.7789	177.759	1.0241	2.68725	29.5164	34.0497	20.0556	30.1836	553.645	451.78	0	225.492	1.7135	2.68601	605.014	443.68	0.9611	70.9294	0	118.406	171.287	219.096	325.181	72.3446	165.412
	134.283	65.501	177.759	1.0241	2.68725	29.5164	34.0497	20.0556	30.1836	553.645	451.78	0	225.492	1.7135	2.68601	605.014	443.68	0.9611	70.9294	0	118.406	173.996	230.323	315.874	75.6983	164.598
	134.283	58.9509	177.759	1.0241	2.68725	29.5164	34.0497	20.0556	30.1836	553.645	451.78	0	225.492	1.7135	2.68601	605.014	443.68	0.9611	70.9294	0	118.406	176.696	241.508	306.045	79.1926	163.532
	134.283	53.0558	177.759	1.0241	2.68725	29.5164	34.0497	20.0556	30.1836	553.645	451.78	0	225.492	1.7135	2.68601	605.014	443.68	0.9611	70.9294	0	118.406	179.371	252.592	295.759	82.8144	162.247
	134.283	47.7502	177.759	1.0241	2.68725	29.5164	34.0497	20.0556	30.1836	553.645	451.78	0	225.492	1.7135	2.68601	605.014	443.68	0.9611	70.9294	0	118.406	182.009	263.522	285.082	86.5484	160.777
	134.283	42.9752	177.759	1.0241	2.68725	29.5164	34.0497	20.0556	30.1836	553.645	451.78	0	225.492	1.7135	2.68601	605.014	443.68	0.9611	70.9294	0	118.406	184.598	274.247	274.082	90.3769	159.156
	134.283	38.6777	177.759	1.0241	2.68725	29.5164	34.0497	20.0556	30.1836	553.645	451.78	0	225.492	1.7135	2.68601	605.014	443.68	0.9611	70.9294	0	118.406	187.125	284.718	262.826	94.2804	157.42
	134.283	34.8099	177.759	1.0241	2.68725	29.5164	34.0497	20.0556	30.1836	553.645	451.78	0	225.492	1.7135	2.68601	605.014	443.68	0.9611	70.9294	0	118.406	189.581	294.892	251.386	98.2377	155.601
	134.283	31.3289	177.759	1.0241	2.68725	29.5164	34.0497	20.0556	30.1836	553.645	451.78	0	225.492	1.7135	2.68601	605.014	443.68	0.9611	70.9294	0	118.406	191.956	304.734	239.833	102.226	153.733
	134.283	28.196	177.759	1.0241	2.68725	29.5164	34.0497	20.0556	30.1836	553.645	451.78	0	225.492	1.7135	2.68601	605.014	443.68	0.9611	70.9294	0	118.406	194.243	314.21	228.24	106.224	151.844
	134.283	25.3764	177.759	1.0241	2.68725	29.5164	34.0497	20.0556	30.1836	553.645	451.78	0	225.492	1.7135	2.68601	605.014	443.68	0.9611	70.9294	0	118.406	196.436	323.296	216.679	110.206	149.961
	134.283	22.8388	177.759	1.0241	2.68725	29.5164	34.0497	20.0556	30.1836	553.645	451.78	0	225.492	1.7135	2.68601	605.014	443.68	0.9611	70.9294	0	118.406	198.53	331.97	205.219	114.15	148.108
	134.283	20.5549	177.759	1.0241	2.68725	29.5164	34.0497	20.0556	30.1836	553.645	451.78	0	225.492	1.7135	2.68601	605.014	443.68	0.9611	70.9294	0	118.406	200.521	340.219	193.926	118.035	146.305
	134.283	18.4994	177.759	1.0241	2.68725	29.5164	34.0497	20.0556	30.1836	553.645	451.78	0	225.492	1.7135	2.68601	605.014	443.68	0.9611	70.9294	0	118.406	202.407	348.035	182.863	121.839	144.567
	134.283	16.6495	177.759	1.0241	2.68725	29.5164	34.0497	20.0556	30.1836	553.645	451.78	0	225.492	1.7135	2.68601	605.014	443.68	0.9611	70.9294	0	118.406	204.188	355.414	172.085	125.544	142.907
	134.283	14.9845	177.759	1.0241	2.68725	29.5164	34.0497	20.0556	30.1836	553.645	451.78	0	225.492	1.7135	2.68601	605.014	443.68	0.9611	70.9294	0	118.406	205.863	362.356	161.642	129.133	141.333
	134.283	13.4861	177.759	1.0241	2.68725	29.5164	34.0497	20.0556	30.1836	553.645	451.78	0	225.492	1.7135	2.68601	605.014	443.68	0.9611	70.9294	0	118.406	207.435	368.867	151.578	132.591	139.852
	134.283	12.1375	177.759	1.0241	2.68725	29.5164	34.0497	20.0556	30.1836	553.645	451.78	0	225.492	1.7135	2.68601	605.014	443.68	0.9611	70.9294	0	118.406	208.905	374.956	141.927	135.907	138.467
	134.283	10.9237	177.759	1.0241	2.68725	29.5164	34.0497	20.0556	30.1836	553.645	451.78	0	225.492	1.7135	2.68601	605.014	443.68	0.9611	70.9294	0	118.406	210.275	380.634	132.717	139.07	137.179
	134.283	9.83135	177.759	1.0241	2.68725	29.5164	34.0497	20.0556	30.1836	553.645	451.78	0	225.492	1.7135	2.68601	605.014	443.68	0.9611	70.9294	0	118.406	211.55	385.915	123.97	142.075	135.987
	134.283	8.84822	177.759	1.0241	2.68725	29.5164	34.0497	20.0556	30.1836	553.645	451.78	0	225.492	1.7135	2.68601	605.014	443.68	0.9611	70.9294	0	118.406	212.732	390.815	115.698	144.916	134.889
	134.283	7.9634	177.759	1.0241	2.68725	29.5164	34.0497	20.0556	30.1836	553.645	451.78	0	225.492	1.7135	2.68601	605.014	443.68	0.9611	70.9294	0	118.406	213.827	395.352	107.907	147.592	133.881
	134.283	7.16706	177.759	1.0241	2.68725	29.5164	34.0497	20.0556	30.1836	553.645	451.78	0	225.492	1.7135	2.68601	605.014	443.68	0.9611	70.9294	0	118.406	214.839	399.543	100.599	150.102	132.96
	134.283	6.45035	177.759	1.0241	2.68725	29.5164	34.0497	20.0556	30.1836	553.645	451.78	0	225.492	1.7135	2.68601	605.014	443.68	0.9611	70.9294	0	118.406	215.772	403.407	93.7677	152.448	132.119
	134.283	5.80532	177.759	1.0241	2.68725	29.5164	34.0497	20.0556	30.1836	553.645	451.78	0	225.492	1.7135	2.68601	605.014	443.68	0.9611	70.9294	0	118.406	216.63	406.965	87.4049	154.633	131.355
	134.283	5.22478	177.759	1.0241	2.68725	29.5164	34.0497	20.0556	30.1836	553.645	451.78	0	225.492	1.7135	2.68601	605.014	443.68	0.9611	70.9294	0	118.406	217.419	410.234	81.497	156.661	130.662
	134.283	4.70231	177.759	1.0241	2.68725	29.5164	34.0497	20.0556	30.1836	553.645	451.78	0	225.492	1.7135	2.68601	605.014	443.68	0.9611	70.9294	0	118.406	218.143	413.234	76.0277	158.54	130.033
	134.283	4.23207	177.759	1.0241	2.68725	29.5164	34.0497	20.0556	30.1836	553.645	451.78	0	225.492	1.7135	2.68601	605.014	443.68	0.9611	70.9294	0	118.406	218.807	415.983	70.9782	160.273	129.465
	134.283	3.80887	177.759	1.0241	2.68725	29.5164	34.0497	20.0556	30.1836	553.645	451.78	0	225.492	1.7135	2.68601	605.014	443.68	0.9611	70.9294	0	118.406	219.414	418.499	66.3281	161.87	128.953
	134.283	3.42798	177.759	1.0241	2.68725	29.5164	34.0497	20.0556	30.1836	553.645	451.78	0	225.492	1.7135	2.68601	605.014	443.68	0.9611	70.9294	0	118.406	219.969	420.799	62.0558	163.337	128.49
	134.283	3.08518	177.759	1.0241	2.68725	29.5164	34.0497	20.0556	30.1836	553.645	451.78	0	225.492	1.7135	2.68601	605.014	443.68	0.9611	70.9294	0	118.406	220.476	422.899	58.139	164.682	128.074
	134.283	2.77666	177.759	1.0241	2.68725	29.5164	34.0497	20.0556	30.1836	553.645	451.78	0	225.492	1.7135	2.68601	605.014	443.68	0.9611	70.9294	0	118.406	220.939	424.815	54.555	165.913	127.699
	134.283	2.499	177.759	1.0241	2.68725	29.5164	34.0497	20.0556	30.1836	553.645	451.78	0	225.492	1.7135	2.68601	605.014	443.68	0.9611	70.9294	0	118.406	221.36	426.562	51.2816	167.037	127.363
	134.283	2.2491	177.759	1.0241	2.68725	29.5164	34.0497	20.0556	30.1836	553.645	451.78	0	225.492	1.7135	2.68601	605.014	443.68	0.9611	70.9294	0	118.406	221.744	428.153	48.2967	168.062	127.06
	134.283	2.02419	177.759	1.0241	2.68725	29.5164	34.0497	20.0556	30.1836	553.645	451.78	0	225.492	1.7135	2.68601	605.014	443.68	0.9611	70.9294	0	118.406	222.094	429.601	45.579	168.995	126.788
	134.283	1.82177	177.759	1.0241	2.68725	29.5164	34.0497	20.0556	30.1836	553.645	451.78	0	225.492	1.7135	2.68601	605.014	443.68	0.9611	70.9294	0	118.406	222.411	430.917	43.1078	169.844	126.545
	134.283	1.63959	177.759	1.0241	2.68725	29.5164	34.0497	20.0556	30.1836	553.645	451.78	0	225.492	1.7135	2.68601	605.014	443.68	0.9611	70.9294	0	118.406	222.7	432.115	40.8636	170.614	126.326
	134.283	1.47563	177.759	1.0241	2.68725	29.5164	34.0497	20.0556	30.1836	553.645	451.78	0	225.492	1.7135	2.68601	605.014	443.68	0.9611	70.9294	0	118.406	222.963	433.202	38.8279	171.313	126.13
	134.283	1.32807	177.759	1.0241	2.68725	29.5164	34.0497	20.0556	30.1836	553.645	451.78	0	225.492	1.7135	2.68601	605.014	443.68	0.9611	70.9294	0	118.406	223.201	434.189	36.9831	171.947	125.954
	134.283	1.19526	177.759	1.0241	2.68725	29.5164	34.0497	20.0556	30.1836	553.645	451.78	0	225.492	1.7135	2.68601	605.014	443.68	0.9611	70.9294	0	118.406	223.417	435.086	35.3129	172.52	125.797
	134.283	1.07574	177.759	1.0241	2.68725	29.5164	34.0497	20.0556	30.1836	553.645	451.78	0	225.492	1.7135	2.68601	605.014	443.68	0.9611	70.9294	0	118.406	223.614	435.899	33.8021	173.039	125.656
	134.283	0.968163	177.759	1.0241	2.68725	29.5164	34.0497	20.0556	30.1836	553.645	451.78	0	225.492	1.7135	2.68601	605.014	443.68	0.9611	70.9294	0	118.406	223.792	436.636	32.4364	173.508	125.53
	134.283	0.871347	177.759	1.0241	2.68725	29.5164	34.0497	20.0556	30.1836	553.645	451.78	0	225.492	1.7135	2.68601	605.014	443.68	0.9611	70.9294	0	118.406	223.953	437.305	31.2027	173.932	125.417
	134.283	0.784212	177.759	1.0241	2.68725	29.5164	34.0497	20.0556	30.1836	553.645	451.78	0	225.492	1.7135	2.68601	605.014	443.68	0.9611	70.9294	0	118.406	224.099	437.911	30.0891	174.314	125.316
	134.283	0.705791	177.759	1.0241	2.68725	29.5164	34.0497	20.0556	30.1836	553.645	451.78	0	225.492	1.7135	2.68601	605.014	443.68	0.9611	70.9294	0	118.406	224.232	438.46	29.0843	174.659	125.225
	134.283	0.635212	177.759	1.0241	2.68725	29.5164	34.0497	20.0556	30.1836	553.645	451.78	0	225.492	1.7135	2.68601	605.014	443.68	0.9611	70.9294	0	118.406	224.352	438.957	28.1782	174.97	125.144
	134.283	0.571691	177.759	1.0241	2.68725	29.5164	34.0497	20.0556	30.1836	553.645	451.78	0	225.492	1.7135	2.68601	605.014	443.68	0.9611	70.9294	0	118.406	224.46	439.408	27.3615	175.251	125.072
	134.283	0.514522	177.759	1.0241	2.68725	29.5164	34.0497	20.0556	30.1836	553.645	451.78	0	225.492	1.7135	2.68601	605.014	443.68	0.9611	70.9294	0	118.406	224.559	439.815	26.6256	175.503	125.007
	134.283	0.463069	177.759	1.0241	2.68725	29.5164	34.0497	20.0556	30.1836	553.645	451.78	0	225.492	1.7135	2.68601	605.014	443.68	0.9611	70.9294	0	118.406	224.648	440.185	25.9628	175.731	124.949
	134.283	0.416762	177.759	1.0241	2.68725	29.5164	34.0497	20.0556	30.1836	553.645	451.78	0	225.492	1.7135	2.68601	605.014	443.68	0.9611	70.9294	0	118.406	224.729	440.519	25.366	175.936	124.898
	134.283	0.375086	177.759	1.0241	2.68725	29.5164	34.0497	20.0556	30.1836	553.645	451.78	0	225.492	1.7135	2.68601	605.014	443.68	0.9611	70.9294	0	118.406	224.802	440.821	24.8289	176.12	124.851
	134.283	0.337578	177.759	1.0241	2.68725	29.5164	34.0497	20.0556	30.1836	553.645	451.78	0	225.492	1.7135	2.68601	605.014	443.68	0.9611	70.9294	0	118.406	224.868	441.095	24.3455	176.286	124.81
	134.283	0.30382	177.759	1.0241	2.68725	29.5164	34.0497	20.0556	30.1836	553.645	451.78	0	225.492	1.7135	2.68601	605.014	443.68	0.9611	70.9294	0	118.406	224.928	441.343	23.9106	176.436	124.773
	134.283	0.273438	177.759	1.0241	2.68725	29.5164	34.0497	20.0556	30.1836	553.645	451.78	0	225.492	1.7135	2.68601	605.014	443.68	0.9611	70.9294	0	118.406	224.982	441.567	23.5195	176.57	124.74
	134.283	0.246094	177.759	1.0241	2.68725	29.5164	34.0497	20.0556	30.1836	553.645	451.78	0	225.492	1.7135	2.68601	605.014	443.68	0.9611	70.9294	0	118.406	225.03	441.769	23.1678	176.691	124.71
	134.283	0.221485	177.759	1.0241	2.68725	29.5164	34.0497	20.0556	30.1836	553.645	451.78	0	225.492	1.7135	2.68601	605.014	443.68	0.9611	70.9294	0	118.406	225.075	441.952	22.8515	176.799	124.684
	134.283	0.199336	177.759	1.0241	2.68725	29.5164	34.0497	20.0556	30.1836	553.645	451.78	0	225.492	1.7135	2.68601	605.014	443.68	0.9611	70.9294	0	118.406	225.115	442.118	22.5672	176.897	124.66
	134.283	0.179403	177.759	1.0241	2.68725	29.5164	34.0497	20.0556	30.1836	553.645	451.78	0	225.492	1.7135	2.68601	605.014	443.68	0.9611	70.9294	0	118.406	225.151	442.268	22.3117	176.985	124.639
	134.283	0.161462	177.759	1.0241	2.68725	29.5164	34.0497	20.0556	30.1836	553.645	451.78	0	225.492	1.7135	2.68601	605.014	443.68	0.9611	70.9294	0	118.406	225.184	442.404	22.082	177.063	124.62
	134.283	0.145316	177.759	1.0241	2.68725	29.5164	34.0497	20.0556	30.1836	553.645	451.78	0	225.492	1.7135	2.68601	605.014	443.68	0.9611	70.9294	0	118.406	225.213	442.526	21.8756	177.134	124.604
	134.283	0.130784	177.759	1.0241	2.68725	29.5164	34.0497	20.0556	30.1836	553.645	451.78	0	225.492	1.7135	2.68601	605.014	443.68	0.9611	70.9294	0	118.406	225.24	442.637	21.6902	177.198	124.589
	134.283	0.117706	177.759	1.0241	2.68725	29.5164	34.0497	20.0556	30.1836	553.645	451.78	0	225.492	1.7135	2.68601	605.014	443.68	0.9611	70.9294	0	118.406	225.264	442.737	21.5235	177.255	124.575

## Sheet: s61 
			K1	Hilli1 x	Hill2 x	K1is	K1ii	V1	Kx1	Kx2	V1is	V1ii	K2	Hill1	Hill2	K3	V2	Hill xx	Kxx1	V2i	K2i
		42.2831	177.759	1.0241	2.68725	29.5164	34.0497	20.0556	30.1836	553.645	451.78	0	225.492	1.7135	2.68601	605.014	443.68	0.9611	70.9294	0	118.406
	S	I	K1	Hilli1 x	Hill2 x	K1is	K1ii	V1	Kx1	Kx2	V1is	V1ii	K2	Hill1	Hill2	K3	V2	Hill xx	Kxx1	V2i	K2i	K2 term	V2 term	V1 term	K1 term	cal	obs
42.2831	103.283	0.33	177.759	1.0241	2.68725	29.5164	34.0497	20.0556	30.1836	553.645	451.78	0	225.492	1.7135	2.68601	605.014	443.68	0.9611	70.9294	0	118.406	224.881	441.15	24.2479	176.32	92.1403	90.5718	1.56847
	103.283	1	177.759	1.0241	2.68725	29.5164	34.0497	20.0556	30.1836	553.645	451.78	0	225.492	1.7135	2.68601	605.014	443.68	0.9611	70.9294	0	118.406	223.739	436.417	32.8411	173.369	93.2874	90.5817	2.70568
	103.283	3.33	177.759	1.0241	2.68725	29.5164	34.0497	20.0556	30.1836	553.645	451.78	0	225.492	1.7135	2.68601	605.014	443.68	0.9611	70.9294	0	118.406	220.113	421.396	60.9432	163.719	97.3595	97.5197	0.160177
	103.283	6.66	177.759	1.0241	2.68725	29.5164	34.0497	20.0556	30.1836	553.645	451.78	0	225.492	1.7135	2.68601	605.014	443.68	0.9611	70.9294	0	118.406	215.496	402.268	95.7914	151.753	103.048	97.6393	5.40867
	103.283	10	177.759	1.0241	2.68725	29.5164	34.0497	20.0556	30.1836	553.645	451.78	0	225.492	1.7135	2.68601	605.014	443.68	0.9611	70.9294	0	118.406	211.35	385.089	125.35	141.601	108.447	101.798	6.64861
	103.283	21	177.759	1.0241	2.68725	29.5164	34.0497	20.0556	30.1836	553.645	451.78	0	225.492	1.7135	2.68601	605.014	443.68	0.9611	70.9294	0	118.406	200.124	338.577	196.206	117.251	123.652	122.64	1.01237
	103.283	33.3	177.759	1.0241	2.68725	29.5164	34.0497	20.0556	30.1836	553.645	451.78	0	225.492	1.7135	2.68601	605.014	443.68	0.9611	70.9294	0	118.406	190.591	299.077	246.533	99.914	136.363	124.498	11.8651
	103.283	45	177.759	1.0241	2.68725	29.5164	34.0497	20.0556	30.1836	553.645	451.78	0	225.492	1.7135	2.68601	605.014	443.68	0.9611	70.9294	0	118.406	183.473	269.589	278.924	88.6935	145.205	134.985	10.2205
	103.283	66.6	177.759	1.0241	2.68725	29.5164	34.0497	20.0556	30.1836	553.645	451.78	0	225.492	1.7135	2.68601	605.014	443.68	0.9611	70.9294	0	118.406	173.569	228.552	317.38	75.1591	155.869	154.727	1.14175
	103.283	100	177.759	1.0241	2.68725	29.5164	34.0497	20.0556	30.1836	553.645	451.78	0	225.492	1.7135	2.68601	605.014	443.68	0.9611	70.9294	0	118.406	163.19	185.551	349.384	63.176	163.828	164.287	0.458986
	103.283	333	177.759	1.0241	2.68725	29.5164	34.0497	20.0556	30.1836	553.645	451.78	0	225.492	1.7135	2.68601	605.014	443.68	0.9611	70.9294	0	118.406	138.161	81.849	325.937	42.1199	138.58	167.94	29.3597
	103.283	450	177.759	1.0241	2.68725	29.5164	34.0497	20.0556	30.1836	553.645	451.78	0	225.492	1.7135	2.68601	605.014	443.68	0.9611	70.9294	0	118.406	133.916	64.2607	261.695	39.9332	111.069	100.082	10.9873
	103.283	666	177.759	1.0241	2.68725	29.5164	34.0497	20.0556	30.1836	553.645	451.78	0	225.492	1.7135	2.68601	605.014	443.68	0.9611	70.9294	0	118.406	129.554	46.1867	153.508	38.3185	68.1998	89.8725	21.6726
	103.283	800	177.759	1.0241	2.68725	29.5164	34.0497	20.0556	30.1836	553.645	451.78	0	225.492	1.7135	2.68601	605.014	443.68	0.9611	70.9294	0	118.406	127.913	39.388	107.924	37.8151	50.6032	32.5075	18.0957
	103.283	1000	177.759	1.0241	2.68725	29.5164	34.0497	20.0556	30.1836	553.645	451.78	0	225.492	1.7135	2.68601	605.014	443.68	0.9611	70.9294	0	118.406	126.211	32.3393	64.9478	37.2826	33.9127	39.3303	5.41764
	103.283	1800	177.759	1.0241	2.68725	29.5164	34.0497	20.0556	30.1836	553.645	451.78	0	225.492	1.7135	2.68601	605.014	443.68	0.9611	70.9294	0	118.406	122.987	18.9788	11.7789	36.0856	11.6314	4.84674	6.78469
	103.283	3333	177.759	1.0241	2.68725	29.5164	34.0497	20.0556	30.1836	553.645	451.78	0	225.492	1.7135	2.68601	605.014	443.68	0.9611	70.9294	0	118.406	120.989	10.7028	0.13867	35.2026	4.58182	2.79073	1.79109
	103.283	6666	177.759	1.0241	2.68725	29.5164	34.0497	20.0556	30.1836	553.645	451.78	0	225.492	1.7135	2.68601	605.014	443.68	0.9611	70.9294	0	118.406	119.749	5.56291	-1.14668	34.6311	2.02536	0.10208	1.92328
	103.283	10000	177.759	1.0241	2.68725	29.5164	34.0497	20.0556	30.1836	553.645	451.78	0	225.492	1.7135	2.68601	605.014	443.68	0.9611	70.9294	0	118.406	119.319	3.78251	-0.94061	34.4359	1.33311	-1.41923	2.75234
	103.283	21000	177.759	1.0241	2.68725	29.5164	34.0497	20.0556	30.1836	553.645	451.78	0	225.492	1.7135	2.68601	605.014	443.68	0.9611	70.9294	0	118.406	118.855	1.86203	-0.503516	34.2312	0.646973	-0.63528	1.28225
	103.283	33000	177.759	1.0241	2.68725	29.5164	34.0497	20.0556	30.1836	553.645	451.78	0	225.492	1.7135	2.68601	605.014	443.68	0.9611	70.9294	0	118.406	118.698	1.20773	-0.325684	34.1641	0.420655	-0.32971	0.750365
	103.283	100000	177.759	1.0241	2.68725	29.5164	34.0497	20.0556	30.1836	553.645	451.78	0	225.492	1.7135	2.68601	605.014	443.68	0.9611	70.9294	0	118.406	118.507	0.41686	-0.10677	34.0865	0.147257	-0.1403	0.287557
																												142.295
	103.283	50000	177.759	1.0241	2.68725	29.5164	34.0497	20.0556	30.1836	553.645	451.78	0	225.492	1.7135	2.68601	605.014	443.68	0.9611	70.9294	0	118.406	118.602	0.810819	-0.215366	34.1245	0.283734
	103.283	45000	177.759	1.0241	2.68725	29.5164	34.0497	20.0556	30.1836	553.645	451.78	0	225.492	1.7135	2.68601	605.014	443.68	0.9611	70.9294	0	118.406	118.623	0.897051	-0.239354	34.133	0.313499
	103.283	40500	177.759	1.0241	2.68725	29.5164	34.0497	20.0556	30.1836	553.645	451.78	0	225.492	1.7135	2.68601	605.014	443.68	0.9611	70.9294	0	118.406	118.646	0.992432	-0.265898	34.1425	0.346404
	103.283	36450	177.759	1.0241	2.68725	29.5164	34.0497	20.0556	30.1836	553.645	451.78	0	225.492	1.7135	2.68601	605.014	443.68	0.9611	70.9294	0	118.406	118.671	1.09793	-0.295229	34.153	0.382787
	103.283	32805	177.759	1.0241	2.68725	29.5164	34.0497	20.0556	30.1836	553.645	451.78	0	225.492	1.7135	2.68601	605.014	443.68	0.9611	70.9294	0	118.406	118.699	1.21461	-0.327589	34.1648	0.423028
	103.283	29524.5	177.759	1.0241	2.68725	29.5164	34.0497	20.0556	30.1836	553.645	451.78	0	225.492	1.7135	2.68601	605.014	443.68	0.9611	70.9294	0	118.406	118.73	1.34366	-0.363219	34.1779	0.467553
	103.283	26572	177.759	1.0241	2.68725	29.5164	34.0497	20.0556	30.1836	553.645	451.78	0	225.492	1.7135	2.68601	605.014	443.68	0.9611	70.9294	0	118.406	118.765	1.48637	-0.402358	34.1925	0.516837
	103.283	23914.8	177.759	1.0241	2.68725	29.5164	34.0497	20.0556	30.1836	553.645	451.78	0	225.492	1.7135	2.68601	605.014	443.68	0.9611	70.9294	0	118.406	118.803	1.64418	-0.445225	34.2087	0.571421
	103.283	21523.4	177.759	1.0241	2.68725	29.5164	34.0497	20.0556	30.1836	553.645	451.78	0	225.492	1.7135	2.68601	605.014	443.68	0.9611	70.9294	0	118.406	118.845	1.81867	-0.492006	34.2267	0.631915
	103.283	19371	177.759	1.0241	2.68725	29.5164	34.0497	20.0556	30.1836	553.645	451.78	0	225.492	1.7135	2.68601	605.014	443.68	0.9611	70.9294	0	118.406	118.892	2.0116	-0.542832	34.2468	0.699013
	103.283	17433.9	177.759	1.0241	2.68725	29.5164	34.0497	20.0556	30.1836	553.645	451.78	0	225.492	1.7135	2.68601	605.014	443.68	0.9611	70.9294	0	118.406	118.943	2.2249	-0.597743	34.2692	0.773511
	103.283	15690.5	177.759	1.0241	2.68725	29.5164	34.0497	20.0556	30.1836	553.645	451.78	0	225.492	1.7135	2.68601	605.014	443.68	0.9611	70.9294	0	118.406	119	2.46068	-0.656651	34.294	0.856324
	103.283	14121.5	177.759	1.0241	2.68725	29.5164	34.0497	20.0556	30.1836	553.645	451.78	0	225.492	1.7135	2.68601	605.014	443.68	0.9611	70.9294	0	118.406	119.063	2.7213	-0.719271	34.3217	0.948517
	103.283	12709.3	177.759	1.0241	2.68725	29.5164	34.0497	20.0556	30.1836	553.645	451.78	0	225.492	1.7135	2.68601	605.014	443.68	0.9611	70.9294	0	118.406	119.132	3.00933	-0.785049	34.3524	1.05133
	103.283	11438.4	177.759	1.0241	2.68725	29.5164	34.0497	20.0556	30.1836	553.645	451.78	0	225.492	1.7135	2.68601	605.014	443.68	0.9611	70.9294	0	118.406	119.209	3.32762	-0.853049	34.3866	1.16623
	103.283	10294.6	177.759	1.0241	2.68725	29.5164	34.0497	20.0556	30.1836	553.645	451.78	0	225.492	1.7135	2.68601	605.014	443.68	0.9611	70.9294	0	118.406	119.294	3.6793	-0.921804	34.4247	1.29495
	103.283	9265.1	177.759	1.0241	2.68725	29.5164	34.0497	20.0556	30.1836	553.645	451.78	0	225.492	1.7135	2.68601	605.014	443.68	0.9611	70.9294	0	118.406	119.388	4.06779	-0.989121	34.4669	1.43958
	103.283	8338.59	177.759	1.0241	2.68725	29.5164	34.0497	20.0556	30.1836	553.645	451.78	0	225.492	1.7135	2.68601	605.014	443.68	0.9611	70.9294	0	118.406	119.491	4.49689	-1.05182	34.5138	1.60265
	103.283	7504.73	177.759	1.0241	2.68725	29.5164	34.0497	20.0556	30.1836	553.645	451.78	0	225.492	1.7135	2.68601	605.014	443.68	0.9611	70.9294	0	118.406	119.606	4.97074	-1.10536	34.5658	1.78724
	103.283	6754.26	177.759	1.0241	2.68725	29.5164	34.0497	20.0556	30.1836	553.645	451.78	0	225.492	1.7135	2.68601	605.014	443.68	0.9611	70.9294	0	118.406	119.732	5.49389	-1.14342	34.6235	1.99715
	103.283	6078.83	177.759	1.0241	2.68725	29.5164	34.0497	20.0556	30.1836	553.645	451.78	0	225.492	1.7135	2.68601	605.014	443.68	0.9611	70.9294	0	118.406	119.871	6.07135	-1.15721	34.6874	2.23711
	103.283	5470.95	177.759	1.0241	2.68725	29.5164	34.0497	20.0556	30.1836	553.645	451.78	0	225.492	1.7135	2.68601	605.014	443.68	0.9611	70.9294	0	118.406	120.025	6.70856	-1.13472	34.7582	2.51302
	103.283	4923.85	177.759	1.0241	2.68725	29.5164	34.0497	20.0556	30.1836	553.645	451.78	0	225.492	1.7135	2.68601	605.014	443.68	0.9611	70.9294	0	118.406	120.195	7.41153	-1.05955	34.8364	2.83235
	103.283	4431.47	177.759	1.0241	2.68725	29.5164	34.0497	20.0556	30.1836	553.645	451.78	0	225.492	1.7135	2.68601	605.014	443.68	0.9611	70.9294	0	118.406	120.382	8.18678	-0.909593	34.9228	3.20454
	103.283	3988.32	177.759	1.0241	2.68725	29.5164	34.0497	20.0556	30.1836	553.645	451.78	0	225.492	1.7135	2.68601	605.014	443.68	0.9611	70.9294	0	118.406	120.588	9.04144	-0.655096	35.018	3.64166
	103.283	3589.49	177.759	1.0241	2.68725	29.5164	34.0497	20.0556	30.1836	553.645	451.78	0	225.492	1.7135	2.68601	605.014	443.68	0.9611	70.9294	0	118.406	120.816	9.98327	-0.256315	35.1228	4.1591
	103.283	3230.54	177.759	1.0241	2.68725	29.5164	34.0497	20.0556	30.1836	553.645	451.78	0	225.492	1.7135	2.68601	605.014	443.68	0.9611	70.9294	0	118.406	121.066	11.0207	0.339565	35.2377	4.77665
	103.283	2907.49	177.759	1.0241	2.68725	29.5164	34.0497	20.0556	30.1836	553.645	451.78	0	225.492	1.7135	2.68601	605.014	443.68	0.9611	70.9294	0	118.406	121.342	12.163	1.20229	35.3636	5.51965
	103.283	2616.74	177.759	1.0241	2.68725	29.5164	34.0497	20.0556	30.1836	553.645	451.78	0	225.492	1.7135	2.68601	605.014	443.68	0.9611	70.9294	0	118.406	121.645	13.4199	2.42333	35.5008	6.42062
	103.283	2355.06	177.759	1.0241	2.68725	29.5164	34.0497	20.0556	30.1836	553.645	451.78	0	225.492	1.7135	2.68601	605.014	443.68	0.9611	70.9294	0	118.406	121.979	14.8023	4.12159	35.65	7.52108
	103.283	2119.56	177.759	1.0241	2.68725	29.5164	34.0497	20.0556	30.1836	553.645	451.78	0	225.492	1.7135	2.68601	605.014	443.68	0.9611	70.9294	0	118.406	122.345	16.3217	6.45011	35.8113	8.87378
	103.283	1907.6	177.759	1.0241	2.68725	29.5164	34.0497	20.0556	30.1836	553.645	451.78	0	225.492	1.7135	2.68601	605.014	443.68	0.9611	70.9294	0	118.406	122.748	17.9906	9.60311	35.9848	10.5451
	103.283	1716.84	177.759	1.0241	2.68725	29.5164	34.0497	20.0556	30.1836	553.645	451.78	0	225.492	1.7135	2.68601	605.014	443.68	0.9611	70.9294	0	118.406	123.19	19.8221	13.8228	36.1703	12.6173
	103.283	1545.16	177.759	1.0241	2.68725	29.5164	34.0497	20.0556	30.1836	553.645	451.78	0	225.492	1.7135	2.68601	605.014	443.68	0.9611	70.9294	0	118.406	123.675	21.8305	19.4041	36.3672	15.1908
	103.283	1390.64	177.759	1.0241	2.68725	29.5164	34.0497	20.0556	30.1836	553.645	451.78	0	225.492	1.7135	2.68601	605.014	443.68	0.9611	70.9294	0	118.406	124.206	24.0309	26.6946	36.5747	18.384
	103.283	1251.58	177.759	1.0241	2.68725	29.5164	34.0497	20.0556	30.1836	553.645	451.78	0	225.492	1.7135	2.68601	605.014	443.68	0.9611	70.9294	0	118.406	124.787	26.4392	36.0857	36.7918	22.3319
	103.283	1126.42	177.759	1.0241	2.68725	29.5164	34.0497	20.0556	30.1836	553.645	451.78	0	225.492	1.7135	2.68601	605.014	443.68	0.9611	70.9294	0	118.406	125.423	29.0721	47.9894	37.0176	27.1787
	103.283	1013.78	177.759	1.0241	2.68725	29.5164	34.0497	20.0556	30.1836	553.645	451.78	0	225.492	1.7135	2.68601	605.014	443.68	0.9611	70.9294	0	118.406	126.117	31.9472	62.7948	37.2516	33.0653
	103.283	912.4	177.759	1.0241	2.68725	29.5164	34.0497	20.0556	30.1836	553.645	451.78	0	225.492	1.7135	2.68601	605.014	443.68	0.9611	70.9294	0	118.406	126.873	35.0825	80.8017	37.4946	40.1078
	103.283	821.16	177.759	1.0241	2.68725	29.5164	34.0497	20.0556	30.1836	553.645	451.78	0	225.492	1.7135	2.68601	605.014	443.68	0.9611	70.9294	0	118.406	127.698	38.4967	102.134	37.7495	48.3685
	103.283	739.044	177.759	1.0241	2.68725	29.5164	34.0497	20.0556	30.1836	553.645	451.78	0	225.492	1.7135	2.68601	605.014	443.68	0.9611	70.9294	0	118.406	128.593	42.2089	126.647	38.0222	57.8235
	103.283	665.14	177.759	1.0241	2.68725	29.5164	34.0497	20.0556	30.1836	553.645	451.78	0	225.492	1.7135	2.68601	605.014	443.68	0.9611	70.9294	0	118.406	129.566	46.2382	153.855	38.3224	68.3342
	103.283	598.626	177.759	1.0241	2.68725	29.5164	34.0497	20.0556	30.1836	553.645	451.78	0	225.492	1.7135	2.68601	605.014	443.68	0.9611	70.9294	0	118.406	130.62	50.6036	182.92	38.6638	79.6358
	103.283	538.763	177.759	1.0241	2.68725	29.5164	34.0497	20.0556	30.1836	553.645	451.78	0	225.492	1.7135	2.68601	605.014	443.68	0.9611	70.9294	0	118.406	131.759	55.3238	212.713	39.0632	91.3526
	103.283	484.887	177.759	1.0241	2.68725	29.5164	34.0497	20.0556	30.1836	553.645	451.78	0	225.492	1.7135	2.68601	605.014	443.68	0.9611	70.9294	0	118.406	132.988	60.4167	241.965	39.5392	103.043
	103.283	436.398	177.759	1.0241	2.68725	29.5164	34.0497	20.0556	30.1836	553.645	451.78	0	225.492	1.7135	2.68601	605.014	443.68	0.9611	70.9294	0	118.406	134.311	65.8988	269.458	40.1105	114.266
	103.283	392.758	177.759	1.0241	2.68725	29.5164	34.0497	20.0556	30.1836	553.645	451.78	0	225.492	1.7135	2.68601	605.014	443.68	0.9611	70.9294	0	118.406	135.732	71.7852	294.194	40.7936	124.64
	103.283	353.483	177.759	1.0241	2.68725	29.5164	34.0497	20.0556	30.1836	553.645	451.78	0	225.492	1.7135	2.68601	605.014	443.68	0.9611	70.9294	0	118.406	137.253	78.0887	315.51	41.6022	133.895
	103.283	318.134	177.759	1.0241	2.68725	29.5164	34.0497	20.0556	30.1836	553.645	451.78	0	225.492	1.7135	2.68601	605.014	443.68	0.9611	70.9294	0	118.406	138.878	84.8194	333.094	42.5464	141.881
	103.283	286.321	177.759	1.0241	2.68725	29.5164	34.0497	20.0556	30.1836	553.645	451.78	0	225.492	1.7135	2.68601	605.014	443.68	0.9611	70.9294	0	118.406	140.607	91.9844	346.943	43.6339	148.562
	103.283	257.689	177.759	1.0241	2.68725	29.5164	34.0497	20.0556	30.1836	553.645	451.78	0	225.492	1.7135	2.68601	605.014	443.68	0.9611	70.9294	0	118.406	142.442	99.5866	357.272	44.8699	153.984
	103.283	231.92	177.759	1.0241	2.68725	29.5164	34.0497	20.0556	30.1836	553.645	451.78	0	225.492	1.7135	2.68601	605.014	443.68	0.9611	70.9294	0	118.406	144.382	107.625	364.426	46.2584	158.243
	103.283	208.728	177.759	1.0241	2.68725	29.5164	34.0497	20.0556	30.1836	553.645	451.78	0	225.492	1.7135	2.68601	605.014	443.68	0.9611	70.9294	0	118.406	146.426	116.093	368.8	47.803	161.46
	103.283	187.855	177.759	1.0241	2.68725	29.5164	34.0497	20.0556	30.1836	553.645	451.78	0	225.492	1.7135	2.68601	605.014	443.68	0.9611	70.9294	0	118.406	148.571	124.98	370.787	49.5067	163.761
	103.283	169.07	177.759	1.0241	2.68725	29.5164	34.0497	20.0556	30.1836	553.645	451.78	0	225.492	1.7135	2.68601	605.014	443.68	0.9611	70.9294	0	118.406	150.813	134.268	370.746	51.3726	165.26
	103.283	152.163	177.759	1.0241	2.68725	29.5164	34.0497	20.0556	30.1836	553.645	451.78	0	225.492	1.7135	2.68601	605.014	443.68	0.9611	70.9294	0	118.406	153.146	143.934	368.988	53.4037	166.059
	103.283	136.946	177.759	1.0241	2.68725	29.5164	34.0497	20.0556	30.1836	553.645	451.78	0	225.492	1.7135	2.68601	605.014	443.68	0.9611	70.9294	0	118.406	155.563	153.951	365.771	55.6025	166.246
	103.283	123.252	177.759	1.0241	2.68725	29.5164	34.0497	20.0556	30.1836	553.645	451.78	0	225.492	1.7135	2.68601	605.014	443.68	0.9611	70.9294	0	118.406	158.057	164.282	361.306	57.971	165.893
	103.283	110.927	177.759	1.0241	2.68725	29.5164	34.0497	20.0556	30.1836	553.645	451.78	0	225.492	1.7135	2.68601	605.014	443.68	0.9611	70.9294	0	118.406	160.617	174.888	355.762	60.5103	165.061
	103.283	99.8339	177.759	1.0241	2.68725	29.5164	34.0497	20.0556	30.1836	553.645	451.78	0	225.492	1.7135	2.68601	605.014	443.68	0.9611	70.9294	0	118.406	163.232	185.724	349.275	63.22	163.805
	103.283	89.8505	177.759	1.0241	2.68725	29.5164	34.0497	20.0556	30.1836	553.645	451.78	0	225.492	1.7135	2.68601	605.014	443.68	0.9611	70.9294	0	118.406	165.891	196.74	341.957	66.0985	162.172
	103.283	80.8655	177.759	1.0241	2.68725	29.5164	34.0497	20.0556	30.1836	553.645	451.78	0	225.492	1.7135	2.68601	605.014	443.68	0.9611	70.9294	0	118.406	168.58	207.882	333.899	69.142	160.209
	103.283	72.7789	177.759	1.0241	2.68725	29.5164	34.0497	20.0556	30.1836	553.645	451.78	0	225.492	1.7135	2.68601	605.014	443.68	0.9611	70.9294	0	118.406	171.287	219.096	325.181	72.3446	157.957
	103.283	65.501	177.759	1.0241	2.68725	29.5164	34.0497	20.0556	30.1836	553.645	451.78	0	225.492	1.7135	2.68601	605.014	443.68	0.9611	70.9294	0	118.406	173.996	230.323	315.874	75.6983	155.46
	103.283	58.9509	177.759	1.0241	2.68725	29.5164	34.0497	20.0556	30.1836	553.645	451.78	0	225.492	1.7135	2.68601	605.014	443.68	0.9611	70.9294	0	118.406	176.696	241.508	306.045	79.1926	152.76
	103.283	53.0558	177.759	1.0241	2.68725	29.5164	34.0497	20.0556	30.1836	553.645	451.78	0	225.492	1.7135	2.68601	605.014	443.68	0.9611	70.9294	0	118.406	179.371	252.592	295.759	82.8144	149.899
	103.283	47.7502	177.759	1.0241	2.68725	29.5164	34.0497	20.0556	30.1836	553.645	451.78	0	225.492	1.7135	2.68601	605.014	443.68	0.9611	70.9294	0	118.406	182.009	263.522	285.082	86.5484	146.92
	103.283	42.9752	177.759	1.0241	2.68725	29.5164	34.0497	20.0556	30.1836	553.645	451.78	0	225.492	1.7135	2.68601	605.014	443.68	0.9611	70.9294	0	118.406	184.598	274.247	274.082	90.3769	143.862
	103.283	38.6777	177.759	1.0241	2.68725	29.5164	34.0497	20.0556	30.1836	553.645	451.78	0	225.492	1.7135	2.68601	605.014	443.68	0.9611	70.9294	0	118.406	187.125	284.718	262.826	94.2804	140.764
	103.283	34.8099	177.759	1.0241	2.68725	29.5164	34.0497	20.0556	30.1836	553.645	451.78	0	225.492	1.7135	2.68601	605.014	443.68	0.9611	70.9294	0	118.406	189.581	294.892	251.386	98.2377	137.662
	103.283	31.3289	177.759	1.0241	2.68725	29.5164	34.0497	20.0556	30.1836	553.645	451.78	0	225.492	1.7135	2.68601	605.014	443.68	0.9611	70.9294	0	118.406	191.956	304.734	239.833	102.226	134.589
	103.283	28.196	177.759	1.0241	2.68725	29.5164	34.0497	20.0556	30.1836	553.645	451.78	0	225.492	1.7135	2.68601	605.014	443.68	0.9611	70.9294	0	118.406	194.243	314.21	228.24	106.224	131.575
	103.283	25.3764	177.759	1.0241	2.68725	29.5164	34.0497	20.0556	30.1836	553.645	451.78	0	225.492	1.7135	2.68601	605.014	443.68	0.9611	70.9294	0	118.406	196.436	323.296	216.679	110.206	128.644
	103.283	22.8388	177.759	1.0241	2.68725	29.5164	34.0497	20.0556	30.1836	553.645	451.78	0	225.492	1.7135	2.68601	605.014	443.68	0.9611	70.9294	0	118.406	198.53	331.97	205.219	114.15	125.818
	103.283	20.5549	177.759	1.0241	2.68725	29.5164	34.0497	20.0556	30.1836	553.645	451.78	0	225.492	1.7135	2.68601	605.014	443.68	0.9611	70.9294	0	118.406	200.521	340.219	193.926	118.035	123.112
	103.283	18.4994	177.759	1.0241	2.68725	29.5164	34.0497	20.0556	30.1836	553.645	451.78	0	225.492	1.7135	2.68601	605.014	443.68	0.9611	70.9294	0	118.406	202.407	348.035	182.863	121.839	120.541
	103.283	16.6495	177.759	1.0241	2.68725	29.5164	34.0497	20.0556	30.1836	553.645	451.78	0	225.492	1.7135	2.68601	605.014	443.68	0.9611	70.9294	0	118.406	204.188	355.414	172.085	125.544	118.111
	103.283	14.9845	177.759	1.0241	2.68725	29.5164	34.0497	20.0556	30.1836	553.645	451.78	0	225.492	1.7135	2.68601	605.014	443.68	0.9611	70.9294	0	118.406	205.863	362.356	161.642	129.133	115.829
	103.283	13.4861	177.759	1.0241	2.68725	29.5164	34.0497	20.0556	30.1836	553.645	451.78	0	225.492	1.7135	2.68601	605.014	443.68	0.9611	70.9294	0	118.406	207.435	368.867	151.578	132.591	113.697
	103.283	12.1375	177.759	1.0241	2.68725	29.5164	34.0497	20.0556	30.1836	553.645	451.78	0	225.492	1.7135	2.68601	605.014	443.68	0.9611	70.9294	0	118.406	208.905	374.956	141.927	135.907	111.714
	103.283	10.9237	177.759	1.0241	2.68725	29.5164	34.0497	20.0556	30.1836	553.645	451.78	0	225.492	1.7135	2.68601	605.014	443.68	0.9611	70.9294	0	118.406	210.275	380.634	132.717	139.07	109.877
	103.283	9.83135	177.759	1.0241	2.68725	29.5164	34.0497	20.0556	30.1836	553.645	451.78	0	225.492	1.7135	2.68601	605.014	443.68	0.9611	70.9294	0	118.406	211.55	385.915	123.97	142.075	108.183
	103.283	8.84822	177.759	1.0241	2.68725	29.5164	34.0497	20.0556	30.1836	553.645	451.78	0	225.492	1.7135	2.68601	605.014	443.68	0.9611	70.9294	0	118.406	212.732	390.815	115.698	144.916	106.624
	103.283	7.9634	177.759	1.0241	2.68725	29.5164	34.0497	20.0556	30.1836	553.645	451.78	0	225.492	1.7135	2.68601	605.014	443.68	0.9611	70.9294	0	118.406	213.827	395.352	107.907	147.592	105.196
	103.283	7.16706	177.759	1.0241	2.68725	29.5164	34.0497	20.0556	30.1836	553.645	451.78	0	225.492	1.7135	2.68601	605.014	443.68	0.9611	70.9294	0	118.406	214.839	399.543	100.599	150.102	103.889
	103.283	6.45035	177.759	1.0241	2.68725	29.5164	34.0497	20.0556	30.1836	553.645	451.78	0	225.492	1.7135	2.68601	605.014	443.68	0.9611	70.9294	0	118.406	215.772	403.407	93.7677	152.448	102.698
	103.283	5.80532	177.759	1.0241	2.68725	29.5164	34.0497	20.0556	30.1836	553.645	451.78	0	225.492	1.7135	2.68601	605.014	443.68	0.9611	70.9294	0	118.406	216.63	406.965	87.4049	154.633	101.613
	103.283	5.22478	177.759	1.0241	2.68725	29.5164	34.0497	20.0556	30.1836	553.645	451.78	0	225.492	1.7135	2.68601	605.014	443.68	0.9611	70.9294	0	118.406	217.419	410.234	81.497	156.661	100.628
	103.283	4.70231	177.759	1.0241	2.68725	29.5164	34.0497	20.0556	30.1836	553.645	451.78	0	225.492	1.7135	2.68601	605.014	443.68	0.9611	70.9294	0	118.406	218.143	413.234	76.0277	158.54	99.7342
	103.283	4.23207	177.759	1.0241	2.68725	29.5164	34.0497	20.0556	30.1836	553.645	451.78	0	225.492	1.7135	2.68601	605.014	443.68	0.9611	70.9294	0	118.406	218.807	415.983	70.9782	160.273	98.9245
	103.283	3.80887	177.759	1.0241	2.68725	29.5164	34.0497	20.0556	30.1836	553.645	451.78	0	225.492	1.7135	2.68601	605.014	443.68	0.9611	70.9294	0	118.406	219.414	418.499	66.3281	161.87	98.192
	103.283	3.42798	177.759	1.0241	2.68725	29.5164	34.0497	20.0556	30.1836	553.645	451.78	0	225.492	1.7135	2.68601	605.014	443.68	0.9611	70.9294	0	118.406	219.969	420.799	62.0558	163.337	97.5301
	103.283	3.08518	177.759	1.0241	2.68725	29.5164	34.0497	20.0556	30.1836	553.645	451.78	0	225.492	1.7135	2.68601	605.014	443.68	0.9611	70.9294	0	118.406	220.476	422.899	58.139	164.682	96.9325
	103.283	2.77666	177.759	1.0241	2.68725	29.5164	34.0497	20.0556	30.1836	553.645	451.78	0	225.492	1.7135	2.68601	605.014	443.68	0.9611	70.9294	0	118.406	220.939	424.815	54.555	165.913	96.3935
	103.283	2.499	177.759	1.0241	2.68725	29.5164	34.0497	20.0556	30.1836	553.645	451.78	0	225.492	1.7135	2.68601	605.014	443.68	0.9611	70.9294	0	118.406	221.36	426.562	51.2816	167.037	95.9076
	103.283	2.2491	177.759	1.0241	2.68725	29.5164	34.0497	20.0556	30.1836	553.645	451.78	0	225.492	1.7135	2.68601	605.014	443.68	0.9611	70.9294	0	118.406	221.744	428.153	48.2967	168.062	95.4699
	103.283	2.02419	177.759	1.0241	2.68725	29.5164	34.0497	20.0556	30.1836	553.645	451.78	0	225.492	1.7135	2.68601	605.014	443.68	0.9611	70.9294	0	118.406	222.094	429.601	45.579	168.995	95.0759
	103.283	1.82177	177.759	1.0241	2.68725	29.5164	34.0497	20.0556	30.1836	553.645	451.78	0	225.492	1.7135	2.68601	605.014	443.68	0.9611	70.9294	0	118.406	222.411	430.917	43.1078	169.844	94.7214
	103.283	1.63959	177.759	1.0241	2.68725	29.5164	34.0497	20.0556	30.1836	553.645	451.78	0	225.492	1.7135	2.68601	605.014	443.68	0.9611	70.9294	0	118.406	222.7	432.115	40.8636	170.614	94.4025
	103.283	1.47563	177.759	1.0241	2.68725	29.5164	34.0497	20.0556	30.1836	553.645	451.78	0	225.492	1.7135	2.68601	605.014	443.68	0.9611	70.9294	0	118.406	222.963	433.202	38.8279	171.313	94.1159
	103.283	1.32807	177.759	1.0241	2.68725	29.5164	34.0497	20.0556	30.1836	553.645	451.78	0	225.492	1.7135	2.68601	605.014	443.68	0.9611	70.9294	0	118.406	223.201	434.189	36.9831	171.947	93.8582
	103.283	1.19526	177.759	1.0241	2.68725	29.5164	34.0497	20.0556	30.1836	553.645	451.78	0	225.492	1.7135	2.68601	605.014	443.68	0.9611	70.9294	0	118.406	223.417	435.086	35.3129	172.52	93.6268
	103.283	1.07574	177.759	1.0241	2.68725	29.5164	34.0497	20.0556	30.1836	553.645	451.78	0	225.492	1.7135	2.68601	605.014	443.68	0.9611	70.9294	0	118.406	223.614	435.899	33.8021	173.039	93.4189
	103.283	0.968163	177.759	1.0241	2.68725	29.5164	34.0497	20.0556	30.1836	553.645	451.78	0	225.492	1.7135	2.68601	605.014	443.68	0.9611	70.9294	0	118.406	223.792	436.636	32.4364	173.508	93.2322
	103.283	0.871347	177.759	1.0241	2.68725	29.5164	34.0497	20.0556	30.1836	553.645	451.78	0	225.492	1.7135	2.68601	605.014	443.68	0.9611	70.9294	0	118.406	223.953	437.305	31.2027	173.932	93.0646
	103.283	0.784212	177.759	1.0241	2.68725	29.5164	34.0497	20.0556	30.1836	553.645	451.78	0	225.492	1.7135	2.68601	605.014	443.68	0.9611	70.9294	0	118.406	224.099	437.911	30.0891	174.314	92.9142
	103.283	0.705791	177.759	1.0241	2.68725	29.5164	34.0497	20.0556	30.1836	553.645	451.78	0	225.492	1.7135	2.68601	605.014	443.68	0.9611	70.9294	0	118.406	224.232	438.46	29.0843	174.659	92.7793
	103.283	0.635212	177.759	1.0241	2.68725	29.5164	34.0497	20.0556	30.1836	553.645	451.78	0	225.492	1.7135	2.68601	605.014	443.68	0.9611	70.9294	0	118.406	224.352	438.957	28.1782	174.97	92.6581
	103.283	0.571691	177.759	1.0241	2.68725	29.5164	34.0497	20.0556	30.1836	553.645	451.78	0	225.492	1.7135	2.68601	605.014	443.68	0.9611	70.9294	0	118.406	224.46	439.408	27.3615	175.251	92.5495
	103.283	0.514522	177.759	1.0241	2.68725	29.5164	34.0497	20.0556	30.1836	553.645	451.78	0	225.492	1.7135	2.68601	605.014	443.68	0.9611	70.9294	0	118.406	224.559	439.815	26.6256	175.503	92.452
	103.283	0.463069	177.759	1.0241	2.68725	29.5164	34.0497	20.0556	30.1836	553.645	451.78	0	225.492	1.7135	2.68601	605.014	443.68	0.9611	70.9294	0	118.406	224.648	440.185	25.9628	175.731	92.3646
	103.283	0.416762	177.759	1.0241	2.68725	29.5164	34.0497	20.0556	30.1836	553.645	451.78	0	225.492	1.7135	2.68601	605.014	443.68	0.9611	70.9294	0	118.406	224.729	440.519	25.366	175.936	92.2863
	103.283	0.375086	177.759	1.0241	2.68725	29.5164	34.0497	20.0556	30.1836	553.645	451.78	0	225.492	1.7135	2.68601	605.014	443.68	0.9611	70.9294	0	118.406	224.802	440.821	24.8289	176.12	92.216
	103.283	0.337578	177.759	1.0241	2.68725	29.5164	34.0497	20.0556	30.1836	553.645	451.78	0	225.492	1.7135	2.68601	605.014	443.68	0.9611	70.9294	0	118.406	224.868	441.095	24.3455	176.286	92.153
	103.283	0.30382	177.759	1.0241	2.68725	29.5164	34.0497	20.0556	30.1836	553.645	451.78	0	225.492	1.7135	2.68601	605.014	443.68	0.9611	70.9294	0	118.406	224.928	441.343	23.9106	176.436	92.0965
	103.283	0.273438	177.759	1.0241	2.68725	29.5164	34.0497	20.0556	30.1836	553.645	451.78	0	225.492	1.7135	2.68601	605.014	443.68	0.9611	70.9294	0	118.406	224.982	441.567	23.5195	176.57	92.0459
	103.283	0.246094	177.759	1.0241	2.68725	29.5164	34.0497	20.0556	30.1836	553.645	451.78	0	225.492	1.7135	2.68601	605.014	443.68	0.9611	70.9294	0	118.406	225.03	441.769	23.1678	176.691	92.0005
	103.283	0.221485	177.759	1.0241	2.68725	29.5164	34.0497	20.0556	30.1836	553.645	451.78	0	225.492	1.7135	2.68601	605.014	443.68	0.9611	70.9294	0	118.406	225.075	441.952	22.8515	176.799	91.9598
	103.283	0.199336	177.759	1.0241	2.68725	29.5164	34.0497	20.0556	30.1836	553.645	451.78	0	225.492	1.7135	2.68601	605.014	443.68	0.9611	70.9294	0	118.406	225.115	442.118	22.5672	176.897	91.9233
	103.283	0.179403	177.759	1.0241	2.68725	29.5164	34.0497	20.0556	30.1836	553.645	451.78	0	225.492	1.7135	2.68601	605.014	443.68	0.9611	70.9294	0	118.406	225.151	442.268	22.3117	176.985	91.8907
	103.283	0.161462	177.759	1.0241	2.68725	29.5164	34.0497	20.0556	30.1836	553.645	451.78	0	225.492	1.7135	2.68601	605.014	443.68	0.9611	70.9294	0	118.406	225.184	442.404	22.082	177.063	91.8614
	103.283	0.145316	177.759	1.0241	2.68725	29.5164	34.0497	20.0556	30.1836	553.645	451.78	0	225.492	1.7135	2.68601	605.014	443.68	0.9611	70.9294	0	118.406	225.213	442.526	21.8756	177.134	91.8352
	103.283	0.130784	177.759	1.0241	2.68725	29.5164	34.0497	20.0556	30.1836	553.645	451.78	0	225.492	1.7135	2.68601	605.014	443.68	0.9611	70.9294	0	118.406	225.24	442.637	21.6902	177.198	91.8117
	103.283	0.117706	177.759	1.0241	2.68725	29.5164	34.0497	20.0556	30.1836	553.645	451.78	0	225.492	1.7135	2.68601	605.014	443.68	0.9611	70.9294	0	118.406	225.264	442.737	21.5235	177.255	91.7906

## Sheet: s25
		s	K1	Hilli1 x	Hill2 x	K1is	K1ii	V1	Kx1	Kx2	V1is	V1ii	K2	Hill1	Hill2	K3	V2	Hill xx	Kxx1	V2i	K2i
		42.2831	177.759	1.0241	2.68725	29.5164	34.0497	20.0556	30.1836	553.645	451.78	0	225.492	1.7135	2.68601	605.014	443.68	0.9611	70.9294	0	118.406
	S	I	K1	Hilli1 x	Hill2 x	K1is	K1ii	V1	Kx1	Kx2	V1is	V1ii	K2	Hill1	Hill2	K3	V2	Hill xx	Kxx1	V2i	K2i	K2 term	V2 term	V1 term	K1 term	cal	obs
42.2831	67.2831	0.33	177.759	1.0241	2.68725	29.5164	34.0497	20.0556	30.1836	553.645	451.78	0	225.492	1.7135	2.68601	605.014	443.68	0.9611	70.9294	0	118.406	224.881	441.15	24.2479	176.32	52.303	50.7148	1.58825
	67.2831	1	177.759	1.0241	2.68725	29.5164	34.0497	20.0556	30.1836	553.645	451.78	0	225.492	1.7135	2.68601	605.014	443.68	0.9611	70.9294	0	118.406	223.739	436.417	32.8411	173.369	53.6565	51.7165	1.94006
	67.2831	3.33	177.759	1.0241	2.68725	29.5164	34.0497	20.0556	30.1836	553.645	451.78	0	225.492	1.7135	2.68601	605.014	443.68	0.9611	70.9294	0	118.406	220.113	421.396	60.9432	163.719	58.4102	52.6066	5.80362
	67.2831	6.66	177.759	1.0241	2.68725	29.5164	34.0497	20.0556	30.1836	553.645	451.78	0	225.492	1.7135	2.68601	605.014	443.68	0.9611	70.9294	0	118.406	215.496	402.268	95.7914	151.753	65.0333	72.6256	7.59233
	67.2831	10	177.759	1.0241	2.68725	29.5164	34.0497	20.0556	30.1836	553.645	451.78	0	225.492	1.7135	2.68601	605.014	443.68	0.9611	70.9294	0	118.406	211.35	385.089	125.35	141.601	71.3566	64.7629	6.5937
	67.2831	21	177.759	1.0241	2.68725	29.5164	34.0497	20.0556	30.1836	553.645	451.78	0	225.492	1.7135	2.68601	605.014	443.68	0.9611	70.9294	0	118.406	200.124	338.577	196.206	117.251	89.6625	83.1039	6.55861
	67.2831	33.3	177.759	1.0241	2.68725	29.5164	34.0497	20.0556	30.1836	553.645	451.78	0	225.492	1.7135	2.68601	605.014	443.68	0.9611	70.9294	0	118.406	190.591	299.077	246.533	99.914	105.947	95.4684	10.4788
	67.2831	45	177.759	1.0241	2.68725	29.5164	34.0497	20.0556	30.1836	553.645	451.78	0	225.492	1.7135	2.68601	605.014	443.68	0.9611	70.9294	0	118.406	183.473	269.589	278.924	88.6935	118.162	107.659	10.504
	67.2831	66.6	177.759	1.0241	2.68725	29.5164	34.0497	20.0556	30.1836	553.645	451.78	0	225.492	1.7135	2.68601	605.014	443.68	0.9611	70.9294	0	118.406	173.569	228.552	317.38	75.1591	134.663	130.573	4.09003
	67.2831	100	177.759	1.0241	2.68725	29.5164	34.0497	20.0556	30.1836	553.645	451.78	0	225.492	1.7135	2.68601	605.014	443.68	0.9611	70.9294	0	118.406	163.19	185.551	349.384	63.176	150.239	144.296	5.94268
	67.2831	333	177.759	1.0241	2.68725	29.5164	34.0497	20.0556	30.1836	553.645	451.78	0	225.492	1.7135	2.68601	605.014	443.68	0.9611	70.9294	0	118.406	138.161	81.849	325.937	42.1199	145.143	136.002	9.14125
	67.2831	450	177.759	1.0241	2.68725	29.5164	34.0497	20.0556	30.1836	553.645	451.78	0	225.492	1.7135	2.68601	605.014	443.68	0.9611	70.9294	0	118.406	133.916	64.2607	261.695	39.9332	117.621	121.137	3.51587
	67.2831	666	177.759	1.0241	2.68725	29.5164	34.0497	20.0556	30.1836	553.645	451.78	0	225.492	1.7135	2.68601	605.014	443.68	0.9611	70.9294	0	118.406	129.554	46.1867	153.508	38.3185	71.3308	62.4517	8.87906
	67.2831	800	177.759	1.0241	2.68725	29.5164	34.0497	20.0556	30.1836	553.645	451.78	0	225.492	1.7135	2.68601	605.014	443.68	0.9611	70.9294	0	118.406	127.913	39.388	107.924	37.8151	51.8789	48.7695	3.10944
	67.2831	1000	177.759	1.0241	2.68725	29.5164	34.0497	20.0556	30.1836	553.645	451.78	0	225.492	1.7135	2.68601	605.014	443.68	0.9611	70.9294	0	118.406	126.211	32.3393	64.9478	37.2826	33.4229	39.09	5.66717
	67.2831	1800	177.759	1.0241	2.68725	29.5164	34.0497	20.0556	30.1836	553.645	451.78	0	225.492	1.7135	2.68601	605.014	443.68	0.9611	70.9294	0	118.406	122.987	18.9788	11.7789	36.0856	9.50431	7.31064	2.19367
	67.2831	3333	177.759	1.0241	2.68725	29.5164	34.0497	20.0556	30.1836	553.645	451.78	0	225.492	1.7135	2.68601	605.014	443.68	0.9611	70.9294	0	118.406	120.989	10.7028	0.13867	35.2026	2.89156	-2.62811	5.51967
	67.2831	6666	177.759	1.0241	2.68725	29.5164	34.0497	20.0556	30.1836	553.645	451.78	0	225.492	1.7135	2.68601	605.014	443.68	0.9611	70.9294	0	118.406	119.749	5.56291	-1.14668	34.6311	1.04838	-0.18621	1.23459
	67.2831	10000	177.759	1.0241	2.68725	29.5164	34.0497	20.0556	30.1836	553.645	451.78	0	225.492	1.7135	2.68601	605.014	443.68	0.9611	70.9294	0	118.406	119.319	3.78251	-0.94061	34.4359	0.65484	-1.92374	2.57858
	67.2831	21000	177.759	1.0241	2.68725	29.5164	34.0497	20.0556	30.1836	553.645	451.78	0	225.492	1.7135	2.68601	605.014	443.68	0.9611	70.9294	0	118.406	118.855	1.86203	-0.503516	34.2312	0.30908	-0.8324	1.14148
	67.2831	33000	177.759	1.0241	2.68725	29.5164	34.0497	20.0556	30.1836	553.645	451.78	0	225.492	1.7135	2.68601	605.014	443.68	0.9611	70.9294	0	118.406	118.698	1.20773	-0.325684	34.1641	0.201376	-0.42765	0.629026
	67.2831	100000	177.759	1.0241	2.68725	29.5164	34.0497	20.0556	30.1836	553.645	451.78	0	225.492	1.7135	2.68601	605.014	443.68	0.9611	70.9294	0	118.406	118.507	0.41686	-0.10677	34.0865	0.0719344	-0.17707	0.249004
																												104.951
	67.2831	50000	177.759	1.0241	2.68725	29.5164	34.0497	20.0556	30.1836	553.645	451.78	0	225.492	1.7135	2.68601	605.014	443.68	0.9611	70.9294	0	118.406	118.602	0.810819	-0.215366	34.1245	0.136699	-0.142893	0.220449
	67.2831	45000	177.759	1.0241	2.68725	29.5164	34.0497	20.0556	30.1836	553.645	451.78	0	225.492	1.7135	2.68601	605.014	443.68	0.9611	70.9294	0	118.406	118.623	0.897051	-0.239354	34.133	0.150761	-0.158796	0.24384
	67.2831	40500	177.759	1.0241	2.68725	29.5164	34.0497	20.0556	30.1836	553.645	451.78	0	225.492	1.7135	2.68601	605.014	443.68	0.9611	70.9294	0	118.406	118.646	0.992432	-0.265898	34.1425	0.166299	-0.17639	0.269702
	67.2831	36450	177.759	1.0241	2.68725	29.5164	34.0497	20.0556	30.1836	553.645	451.78	0	225.492	1.7135	2.68601	605.014	443.68	0.9611	70.9294	0	118.406	118.671	1.09793	-0.295229	34.153	0.183481	-0.195827	0.298291
	67.2831	32805	177.759	1.0241	2.68725	29.5164	34.0497	20.0556	30.1836	553.645	451.78	0	225.492	1.7135	2.68601	605.014	443.68	0.9611	70.9294	0	118.406	118.699	1.21461	-0.327589	34.1648	0.202498	-0.217266	0.329894
	67.2831	29524.5	177.759	1.0241	2.68725	29.5164	34.0497	20.0556	30.1836	553.645	451.78	0	225.492	1.7135	2.68601	605.014	443.68	0.9611	70.9294	0	118.406	118.73	1.34366	-0.363219	34.1779	0.223569	-0.240866	0.364823
	67.2831	26572	177.759	1.0241	2.68725	29.5164	34.0497	20.0556	30.1836	553.645	451.78	0	225.492	1.7135	2.68601	605.014	443.68	0.9611	70.9294	0	118.406	118.765	1.48637	-0.402358	34.1925	0.246947	-0.266782	0.403423
	67.2831	23914.8	177.759	1.0241	2.68725	29.5164	34.0497	20.0556	30.1836	553.645	451.78	0	225.492	1.7135	2.68601	605.014	443.68	0.9611	70.9294	0	118.406	118.803	1.64418	-0.445225	34.2087	0.272927	-0.295158	0.446076
	67.2831	21523.4	177.759	1.0241	2.68725	29.5164	34.0497	20.0556	30.1836	553.645	451.78	0	225.492	1.7135	2.68601	605.014	443.68	0.9611	70.9294	0	118.406	118.845	1.81867	-0.492006	34.2267	0.301855	-0.326113	0.493198
	67.2831	19371	177.759	1.0241	2.68725	29.5164	34.0497	20.0556	30.1836	553.645	451.78	0	225.492	1.7135	2.68601	605.014	443.68	0.9611	70.9294	0	118.406	118.892	2.0116	-0.542832	34.2468	0.334139	-0.35973	0.54525
	67.2831	17433.9	177.759	1.0241	2.68725	29.5164	34.0497	20.0556	30.1836	553.645	451.78	0	225.492	1.7135	2.68601	605.014	443.68	0.9611	70.9294	0	118.406	118.943	2.2249	-0.597743	34.2692	0.370268	-0.396033	0.602735
	67.2831	15690.5	177.759	1.0241	2.68725	29.5164	34.0497	20.0556	30.1836	553.645	451.78	0	225.492	1.7135	2.68601	605.014	443.68	0.9611	70.9294	0	118.406	119	2.46068	-0.656651	34.294	0.410833	-0.434955	0.66621
	67.2831	14121.5	177.759	1.0241	2.68725	29.5164	34.0497	20.0556	30.1836	553.645	451.78	0	225.492	1.7135	2.68601	605.014	443.68	0.9611	70.9294	0	118.406	119.063	2.7213	-0.719271	34.3217	0.45655	-0.476304	0.73628
	67.2831	12709.3	177.759	1.0241	2.68725	29.5164	34.0497	20.0556	30.1836	553.645	451.78	0	225.492	1.7135	2.68601	605.014	443.68	0.9611	70.9294	0	118.406	119.132	3.00933	-0.785049	34.3524	0.508303	-0.519705	0.813613
	67.2831	11438.4	177.759	1.0241	2.68725	29.5164	34.0497	20.0556	30.1836	553.645	451.78	0	225.492	1.7135	2.68601	605.014	443.68	0.9611	70.9294	0	118.406	119.209	3.32762	-0.853049	34.3866	0.567184	-0.564531	0.898938
	67.2831	10294.6	177.759	1.0241	2.68725	29.5164	34.0497	20.0556	30.1836	553.645	451.78	0	225.492	1.7135	2.68601	605.014	443.68	0.9611	70.9294	0	118.406	119.294	3.6793	-0.921804	34.4247	0.634562	-0.609804	0.99305
	67.2831	9265.1	177.759	1.0241	2.68725	29.5164	34.0497	20.0556	30.1836	553.645	451.78	0	225.492	1.7135	2.68601	605.014	443.68	0.9611	70.9294	0	118.406	119.388	4.06779	-0.989121	34.4669	0.71216	-0.654065	1.09682
	67.2831	8338.59	177.759	1.0241	2.68725	29.5164	34.0497	20.0556	30.1836	553.645	451.78	0	225.492	1.7135	2.68601	605.014	443.68	0.9611	70.9294	0	118.406	119.491	4.49689	-1.05182	34.5138	0.802165	-0.695203	1.2112
	67.2831	7504.73	177.759	1.0241	2.68725	29.5164	34.0497	20.0556	30.1836	553.645	451.78	0	225.492	1.7135	2.68601	605.014	443.68	0.9611	70.9294	0	118.406	119.606	4.97074	-1.10536	34.5658	0.90737	-0.730221	1.33721
	67.2831	6754.26	177.759	1.0241	2.68725	29.5164	34.0497	20.0556	30.1836	553.645	451.78	0	225.492	1.7135	2.68601	605.014	443.68	0.9611	70.9294	0	118.406	119.732	5.49389	-1.14342	34.6235	1.03136	-0.754935	1.47598
	67.2831	6078.83	177.759	1.0241	2.68725	29.5164	34.0497	20.0556	30.1836	553.645	451.78	0	225.492	1.7135	2.68601	605.014	443.68	0.9611	70.9294	0	118.406	119.871	6.07135	-1.15721	34.6874	1.17877	-0.763564	1.62873
	67.2831	5470.95	177.759	1.0241	2.68725	29.5164	34.0497	20.0556	30.1836	553.645	451.78	0	225.492	1.7135	2.68601	605.014	443.68	0.9611	70.9294	0	118.406	120.025	6.70856	-1.13472	34.7582	1.35558	-0.748199	1.79676
	67.2831	4923.85	177.759	1.0241	2.68725	29.5164	34.0497	20.0556	30.1836	553.645	451.78	0	225.492	1.7135	2.68601	605.014	443.68	0.9611	70.9294	0	118.406	120.195	7.41153	-1.05955	34.8364	1.56957	-0.698103	1.9815
	67.2831	4431.47	177.759	1.0241	2.68725	29.5164	34.0497	20.0556	30.1836	553.645	451.78	0	225.492	1.7135	2.68601	605.014	443.68	0.9611	70.9294	0	118.406	120.382	8.18678	-0.909593	34.9228	1.83086	-0.598794	2.18446
	67.2831	3988.32	177.759	1.0241	2.68725	29.5164	34.0497	20.0556	30.1836	553.645	451.78	0	225.492	1.7135	2.68601	605.014	443.68	0.9611	70.9294	0	118.406	120.588	9.04144	-0.655096	35.018	2.15265	-0.430854	2.40729
	67.2831	3589.49	177.759	1.0241	2.68725	29.5164	34.0497	20.0556	30.1836	553.645	451.78	0	225.492	1.7135	2.68601	605.014	443.68	0.9611	70.9294	0	118.406	120.816	9.98327	-0.256315	35.1228	2.5521	-0.168405	2.65173
	67.2831	3230.54	177.759	1.0241	2.68725	29.5164	34.0497	20.0556	30.1836	553.645	451.78	0	225.492	1.7135	2.68601	605.014	443.68	0.9611	70.9294	0	118.406	121.066	11.0207	0.339565	35.2377	3.05159	0.222852	2.91962
	67.2831	2907.49	177.759	1.0241	2.68725	29.5164	34.0497	20.0556	30.1836	553.645	451.78	0	225.492	1.7135	2.68601	605.014	443.68	0.9611	70.9294	0	118.406	121.342	12.163	1.20229	35.3636	3.68014	0.788081	3.21294
	67.2831	2616.74	177.759	1.0241	2.68725	29.5164	34.0497	20.0556	30.1836	553.645	451.78	0	225.492	1.7135	2.68601	605.014	443.68	0.9611	70.9294	0	118.406	121.645	13.4199	2.42333	35.5008	4.47534	1.58633	3.53375
	67.2831	2355.06	177.759	1.0241	2.68725	29.5164	34.0497	20.0556	30.1836	553.645	451.78	0	225.492	1.7135	2.68601	605.014	443.68	0.9611	70.9294	0	118.406	121.979	14.8023	4.12159	35.65	5.48554	2.69411	3.88422
	67.2831	2119.56	177.759	1.0241	2.68725	29.5164	34.0497	20.0556	30.1836	553.645	451.78	0	225.492	1.7135	2.68601	605.014	443.68	0.9611	70.9294	0	118.406	122.345	16.3217	6.45011	35.8113	6.77243	4.20957	4.26658
	67.2831	1907.6	177.759	1.0241	2.68725	29.5164	34.0497	20.0556	30.1836	553.645	451.78	0	225.492	1.7135	2.68601	605.014	443.68	0.9611	70.9294	0	118.406	122.748	17.9906	9.60311	35.9848	8.4139	6.2568	4.68315
	67.2831	1716.84	177.759	1.0241	2.68725	29.5164	34.0497	20.0556	30.1836	553.645	451.78	0	225.492	1.7135	2.68601	605.014	443.68	0.9611	70.9294	0	118.406	123.19	19.8221	13.8228	36.1703	10.5067	8.98994	5.13629
	67.2831	1545.16	177.759	1.0241	2.68725	29.5164	34.0497	20.0556	30.1836	553.645	451.78	0	225.492	1.7135	2.68601	605.014	443.68	0.9611	70.9294	0	118.406	123.675	21.8305	19.4041	36.3672	13.1684	12.5959	5.62836
	67.2831	1390.64	177.759	1.0241	2.68725	29.5164	34.0497	20.0556	30.1836	553.645	451.78	0	225.492	1.7135	2.68601	605.014	443.68	0.9611	70.9294	0	118.406	124.206	24.0309	26.6946	36.5747	16.5378	17.2938	6.16174
	67.2831	1251.58	177.759	1.0241	2.68725	29.5164	34.0497	20.0556	30.1836	553.645	451.78	0	225.492	1.7135	2.68601	605.014	443.68	0.9611	70.9294	0	118.406	124.787	26.4392	36.0857	36.7918	20.7717	23.329	6.73871
	67.2831	1126.42	177.759	1.0241	2.68725	29.5164	34.0497	20.0556	30.1836	553.645	451.78	0	225.492	1.7135	2.68601	605.014	443.68	0.9611	70.9294	0	118.406	125.423	29.0721	47.9894	37.0176	26.0361	30.9574	7.36149
	67.2831	1013.78	177.759	1.0241	2.68725	29.5164	34.0497	20.0556	30.1836	553.645	451.78	0	225.492	1.7135	2.68601	605.014	443.68	0.9611	70.9294	0	118.406	126.117	31.9472	62.7948	37.2516	32.4902	40.4175	8.03211
	67.2831	912.4	177.759	1.0241	2.68725	29.5164	34.0497	20.0556	30.1836	553.645	451.78	0	225.492	1.7135	2.68601	605.014	443.68	0.9611	70.9294	0	118.406	126.873	35.0825	80.8017	37.4946	40.26	51.8869	8.75238
	67.2831	821.16	177.759	1.0241	2.68725	29.5164	34.0497	20.0556	30.1836	553.645	451.78	0	225.492	1.7135	2.68601	605.014	443.68	0.9611	70.9294	0	118.406	127.698	38.4967	102.134	37.7495	49.4037	65.4264	9.52384
	67.2831	739.044	177.759	1.0241	2.68725	29.5164	34.0497	20.0556	30.1836	553.645	451.78	0	225.492	1.7135	2.68601	605.014	443.68	0.9611	70.9294	0	118.406	128.593	42.2089	126.647	38.0222	59.8725	80.919	10.3476
	67.2831	665.14	177.759	1.0241	2.68725	29.5164	34.0497	20.0556	30.1836	553.645	451.78	0	225.492	1.7135	2.68601	605.014	443.68	0.9611	70.9294	0	118.406	129.566	46.2382	153.855	38.3224	71.4788	98.024	11.2245
	67.2831	598.626	177.759	1.0241	2.68725	29.5164	34.0497	20.0556	30.1836	553.645	451.78	0	225.492	1.7135	2.68601	605.014	443.68	0.9611	70.9294	0	118.406	130.62	50.6036	182.92	38.6638	83.8845	116.166	12.1546
	67.2831	538.763	177.759	1.0241	2.68725	29.5164	34.0497	20.0556	30.1836	553.645	451.78	0	225.492	1.7135	2.68601	605.014	443.68	0.9611	70.9294	0	118.406	131.759	55.3238	212.713	39.0632	96.6229	134.579	13.1376
	67.2831	484.887	177.759	1.0241	2.68725	29.5164	34.0497	20.0556	30.1836	553.645	451.78	0	225.492	1.7135	2.68601	605.014	443.68	0.9611	70.9294	0	118.406	132.988	60.4167	241.965	39.5392	109.156	152.404	14.1722
	67.2831	436.398	177.759	1.0241	2.68725	29.5164	34.0497	20.0556	30.1836	553.645	451.78	0	225.492	1.7135	2.68601	605.014	443.68	0.9611	70.9294	0	118.406	134.311	65.8988	269.458	40.1105	120.954	168.818	15.2568
	67.2831	392.758	177.759	1.0241	2.68725	29.5164	34.0497	20.0556	30.1836	553.645	451.78	0	225.492	1.7135	2.68601	605.014	443.68	0.9611	70.9294	0	118.406	135.732	71.7852	294.194	40.7936	131.57	183.151	16.3885
	67.2831	353.483	177.759	1.0241	2.68725	29.5164	34.0497	20.0556	30.1836	553.645	451.78	0	225.492	1.7135	2.68601	605.014	443.68	0.9611	70.9294	0	118.406	137.253	78.0887	315.51	41.6022	140.698	194.962	17.564
	67.2831	318.134	177.759	1.0241	2.68725	29.5164	34.0497	20.0556	30.1836	553.645	451.78	0	225.492	1.7135	2.68601	605.014	443.68	0.9611	70.9294	0	118.406	138.878	84.8194	333.094	42.5464	148.18	204.058	18.7789
	67.2831	286.321	177.759	1.0241	2.68725	29.5164	34.0497	20.0556	30.1836	553.645	451.78	0	225.492	1.7135	2.68601	605.014	443.68	0.9611	70.9294	0	118.406	140.607	91.9844	346.943	43.6339	153.997	210.458	20.028
	67.2831	257.689	177.759	1.0241	2.68725	29.5164	34.0497	20.0556	30.1836	553.645	451.78	0	225.492	1.7135	2.68601	605.014	443.68	0.9611	70.9294	0	118.406	142.442	99.5866	357.272	44.8699	158.23	214.336	21.3054
	67.2831	231.92	177.759	1.0241	2.68725	29.5164	34.0497	20.0556	30.1836	553.645	451.78	0	225.492	1.7135	2.68601	605.014	443.68	0.9611	70.9294	0	118.406	144.382	107.625	364.426	46.2584	161.022	215.954	22.6044
	67.2831	208.728	177.759	1.0241	2.68725	29.5164	34.0497	20.0556	30.1836	553.645	451.78	0	225.492	1.7135	2.68601	605.014	443.68	0.9611	70.9294	0	118.406	146.426	116.093	368.8	47.803	162.541	215.613	23.9179
	67.2831	187.855	177.759	1.0241	2.68725	29.5164	34.0497	20.0556	30.1836	553.645	451.78	0	225.492	1.7135	2.68601	605.014	443.68	0.9611	70.9294	0	118.406	148.571	124.98	370.787	49.5067	162.961	213.612	25.2381
	67.2831	169.07	177.759	1.0241	2.68725	29.5164	34.0497	20.0556	30.1836	553.645	451.78	0	225.492	1.7135	2.68601	605.014	443.68	0.9611	70.9294	0	118.406	150.813	134.268	370.746	51.3726	162.443	210.23	26.5571
	67.2831	152.163	177.759	1.0241	2.68725	29.5164	34.0497	20.0556	30.1836	553.645	451.78	0	225.492	1.7135	2.68601	605.014	443.68	0.9611	70.9294	0	118.406	153.146	143.934	368.988	53.4037	161.131	205.712	27.8668
	67.2831	136.946	177.759	1.0241	2.68725	29.5164	34.0497	20.0556	30.1836	553.645	451.78	0	225.492	1.7135	2.68601	605.014	443.68	0.9611	70.9294	0	118.406	155.563	153.951	365.771	55.6025	159.149	200.269	29.1594
	67.2831	123.252	177.759	1.0241	2.68725	29.5164	34.0497	20.0556	30.1836	553.645	451.78	0	225.492	1.7135	2.68601	605.014	443.68	0.9611	70.9294	0	118.406	158.057	164.282	361.306	57.971	156.604	194.084	30.4272
	67.2831	110.927	177.759	1.0241	2.68725	29.5164	34.0497	20.0556	30.1836	553.645	451.78	0	225.492	1.7135	2.68601	605.014	443.68	0.9611	70.9294	0	118.406	160.617	174.888	355.762	60.5103	153.589	187.308	31.6631
	67.2831	99.8339	177.759	1.0241	2.68725	29.5164	34.0497	20.0556	30.1836	553.645	451.78	0	225.492	1.7135	2.68601	605.014	443.68	0.9611	70.9294	0	118.406	163.232	185.724	349.275	63.22	150.182	180.075	32.8606
	67.2831	89.8505	177.759	1.0241	2.68725	29.5164	34.0497	20.0556	30.1836	553.645	451.78	0	225.492	1.7135	2.68601	605.014	443.68	0.9611	70.9294	0	118.406	165.891	196.74	341.957	66.0985	146.456	172.497	34.014
	67.2831	80.8655	177.759	1.0241	2.68725	29.5164	34.0497	20.0556	30.1836	553.645	451.78	0	225.492	1.7135	2.68601	605.014	443.68	0.9611	70.9294	0	118.406	168.58	207.882	333.899	69.142	142.473	164.675	35.1185
	67.2831	72.7789	177.759	1.0241	2.68725	29.5164	34.0497	20.0556	30.1836	553.645	451.78	0	225.492	1.7135	2.68601	605.014	443.68	0.9611	70.9294	0	118.406	171.287	219.096	325.181	72.3446	138.294	156.697	36.1702
	67.2831	65.501	177.759	1.0241	2.68725	29.5164	34.0497	20.0556	30.1836	553.645	451.78	0	225.492	1.7135	2.68601	605.014	443.68	0.9611	70.9294	0	118.406	173.996	230.323	315.874	75.6983	133.973	148.642	37.1663
	67.2831	58.9509	177.759	1.0241	2.68725	29.5164	34.0497	20.0556	30.1836	553.645	451.78	0	225.492	1.7135	2.68601	605.014	443.68	0.9611	70.9294	0	118.406	176.696	241.508	306.045	79.1926	129.561	140.581	38.1049
	67.2831	53.0558	177.759	1.0241	2.68725	29.5164	34.0497	20.0556	30.1836	553.645	451.78	0	225.492	1.7135	2.68601	605.014	443.68	0.9611	70.9294	0	118.406	179.371	252.592	295.759	82.8144	125.107	132.578	38.985
	67.2831	47.7502	177.759	1.0241	2.68725	29.5164	34.0497	20.0556	30.1836	553.645	451.78	0	225.492	1.7135	2.68601	605.014	443.68	0.9611	70.9294	0	118.406	182.009	263.522	285.082	86.5484	120.654	124.69	39.8065
	67.2831	42.9752	177.759	1.0241	2.68725	29.5164	34.0497	20.0556	30.1836	553.645	451.78	0	225.492	1.7135	2.68601	605.014	443.68	0.9611	70.9294	0	118.406	184.598	274.247	274.082	90.3769	116.242	116.967	40.5702
	67.2831	38.6777	177.759	1.0241	2.68725	29.5164	34.0497	20.0556	30.1836	553.645	451.78	0	225.492	1.7135	2.68601	605.014	443.68	0.9611	70.9294	0	118.406	187.125	284.718	262.826	94.2804	111.909	109.454	41.2771
	67.2831	34.8099	177.759	1.0241	2.68725	29.5164	34.0497	20.0556	30.1836	553.645	451.78	0	225.492	1.7135	2.68601	605.014	443.68	0.9611	70.9294	0	118.406	189.581	294.892	251.386	98.2377	107.685	102.187	41.9294
	67.2831	31.3289	177.759	1.0241	2.68725	29.5164	34.0497	20.0556	30.1836	553.645	451.78	0	225.492	1.7135	2.68601	605.014	443.68	0.9611	70.9294	0	118.406	191.956	304.734	239.833	102.226	103.598	95.1965	42.5291
	67.2831	28.196	177.759	1.0241	2.68725	29.5164	34.0497	20.0556	30.1836	553.645	451.78	0	225.492	1.7135	2.68601	605.014	443.68	0.9611	70.9294	0	118.406	194.243	314.21	228.24	106.224	99.6707	88.5079	43.0789
	67.2831	25.3764	177.759	1.0241	2.68725	29.5164	34.0497	20.0556	30.1836	553.645	451.78	0	225.492	1.7135	2.68601	605.014	443.68	0.9611	70.9294	0	118.406	196.436	323.296	216.679	110.206	95.9195	82.1395	43.5817
	67.2831	22.8388	177.759	1.0241	2.68725	29.5164	34.0497	20.0556	30.1836	553.645	451.78	0	225.492	1.7135	2.68601	605.014	443.68	0.9611	70.9294	0	118.406	198.53	331.97	205.219	114.15	92.3581	76.1038	44.0404
	67.2831	20.5549	177.759	1.0241	2.68725	29.5164	34.0497	20.0556	30.1836	553.645	451.78	0	225.492	1.7135	2.68601	605.014	443.68	0.9611	70.9294	0	118.406	200.521	340.219	193.926	118.035	88.9951	70.4084	44.458
	67.2831	18.4994	177.759	1.0241	2.68725	29.5164	34.0497	20.0556	30.1836	553.645	451.78	0	225.492	1.7135	2.68601	605.014	443.68	0.9611	70.9294	0	118.406	202.407	348.035	182.863	121.839	85.8355	65.0561	44.8376
	67.2831	16.6495	177.759	1.0241	2.68725	29.5164	34.0497	20.0556	30.1836	553.645	451.78	0	225.492	1.7135	2.68601	605.014	443.68	0.9611	70.9294	0	118.406	204.188	355.414	172.085	125.544	82.8807	60.0453	45.182
	67.2831	14.9845	177.759	1.0241	2.68725	29.5164	34.0497	20.0556	30.1836	553.645	451.78	0	225.492	1.7135	2.68601	605.014	443.68	0.9611	70.9294	0	118.406	205.863	362.356	161.642	129.133	80.129	55.3711	45.4941
	67.2831	13.4861	177.759	1.0241	2.68725	29.5164	34.0497	20.0556	30.1836	553.645	451.78	0	225.492	1.7135	2.68601	605.014	443.68	0.9611	70.9294	0	118.406	207.435	368.867	151.578	132.591	77.5765	51.0251	45.7767
	67.2831	12.1375	177.759	1.0241	2.68725	29.5164	34.0497	20.0556	30.1836	553.645	451.78	0	225.492	1.7135	2.68601	605.014	443.68	0.9611	70.9294	0	118.406	208.905	374.956	141.927	135.907	75.2171	46.9968	46.0323
	67.2831	10.9237	177.759	1.0241	2.68725	29.5164	34.0497	20.0556	30.1836	553.645	451.78	0	225.492	1.7135	2.68601	605.014	443.68	0.9611	70.9294	0	118.406	210.275	380.634	132.717	139.07	73.0431	43.2735	46.2633
	67.2831	9.83135	177.759	1.0241	2.68725	29.5164	34.0497	20.0556	30.1836	553.645	451.78	0	225.492	1.7135	2.68601	605.014	443.68	0.9611	70.9294	0	118.406	211.55	385.915	123.97	142.075	71.0458	39.8412	46.4719
	67.2831	8.84822	177.759	1.0241	2.68725	29.5164	34.0497	20.0556	30.1836	553.645	451.78	0	225.492	1.7135	2.68601	605.014	443.68	0.9611	70.9294	0	118.406	212.732	390.815	115.698	144.916	69.2154	36.6848	46.6603
	67.2831	7.9634	177.759	1.0241	2.68725	29.5164	34.0497	20.0556	30.1836	553.645	451.78	0	225.492	1.7135	2.68601	605.014	443.68	0.9611	70.9294	0	118.406	213.827	395.352	107.907	147.592	67.542	33.7886	46.8303
	67.2831	7.16706	177.759	1.0241	2.68725	29.5164	34.0497	20.0556	30.1836	553.645	451.78	0	225.492	1.7135	2.68601	605.014	443.68	0.9611	70.9294	0	118.406	214.839	399.543	100.599	150.102	66.0153	31.1364	46.9837
	67.2831	6.45035	177.759	1.0241	2.68725	29.5164	34.0497	20.0556	30.1836	553.645	451.78	0	225.492	1.7135	2.68601	605.014	443.68	0.9611	70.9294	0	118.406	215.772	403.407	93.7677	152.448	64.625	28.7123	47.122
	67.2831	5.80532	177.759	1.0241	2.68725	29.5164	34.0497	20.0556	30.1836	553.645	451.78	0	225.492	1.7135	2.68601	605.014	443.68	0.9611	70.9294	0	118.406	216.63	406.965	87.4049	154.633	63.3611	26.5005	47.2468
	67.2831	5.22478	177.759	1.0241	2.68725	29.5164	34.0497	20.0556	30.1836	553.645	451.78	0	225.492	1.7135	2.68601	605.014	443.68	0.9611	70.9294	0	118.406	217.419	410.234	81.497	156.661	62.2136	24.4854	47.3594
	67.2831	4.70231	177.759	1.0241	2.68725	29.5164	34.0497	20.0556	30.1836	553.645	451.78	0	225.492	1.7135	2.68601	605.014	443.68	0.9611	70.9294	0	118.406	218.143	413.234	76.0277	158.54	61.1733	22.6522	47.4609
	67.2831	4.23207	177.759	1.0241	2.68725	29.5164	34.0497	20.0556	30.1836	553.645	451.78	0	225.492	1.7135	2.68601	605.014	443.68	0.9611	70.9294	0	118.406	218.807	415.983	70.9782	160.273	60.2313	20.9866	47.5525
	67.2831	3.80887	177.759	1.0241	2.68725	29.5164	34.0497	20.0556	30.1836	553.645	451.78	0	225.492	1.7135	2.68601	605.014	443.68	0.9611	70.9294	0	118.406	219.414	418.499	66.3281	161.87	59.3791	19.475	47.6351
	67.2831	3.42798	177.759	1.0241	2.68725	29.5164	34.0497	20.0556	30.1836	553.645	451.78	0	225.492	1.7135	2.68601	605.014	443.68	0.9611	70.9294	0	118.406	219.969	420.799	62.0558	163.337	58.6088	18.1047	47.7096
	67.2831	3.08518	177.759	1.0241	2.68725	29.5164	34.0497	20.0556	30.1836	553.645	451.78	0	225.492	1.7135	2.68601	605.014	443.68	0.9611	70.9294	0	118.406	220.476	422.899	58.139	164.682	57.9132	16.8636	47.7768
	67.2831	2.77666	177.759	1.0241	2.68725	29.5164	34.0497	20.0556	30.1836	553.645	451.78	0	225.492	1.7135	2.68601	605.014	443.68	0.9611	70.9294	0	118.406	220.939	424.815	54.555	165.913	57.2855	15.7405	47.8374
	67.2831	2.499	177.759	1.0241	2.68725	29.5164	34.0497	20.0556	30.1836	553.645	451.78	0	225.492	1.7135	2.68601	605.014	443.68	0.9611	70.9294	0	118.406	221.36	426.562	51.2816	167.037	56.7194	14.7251	47.8921
	67.2831	2.2491	177.759	1.0241	2.68725	29.5164	34.0497	20.0556	30.1836	553.645	451.78	0	225.492	1.7135	2.68601	605.014	443.68	0.9611	70.9294	0	118.406	221.744	428.153	48.2967	168.062	56.2091	13.8076	47.9415
	67.2831	2.02419	177.759	1.0241	2.68725	29.5164	34.0497	20.0556	30.1836	553.645	451.78	0	225.492	1.7135	2.68601	605.014	443.68	0.9611	70.9294	0	118.406	222.094	429.601	45.579	168.995	55.7494	12.9792	47.986
	67.2831	1.82177	177.759	1.0241	2.68725	29.5164	34.0497	20.0556	30.1836	553.645	451.78	0	225.492	1.7135	2.68601	605.014	443.68	0.9611	70.9294	0	118.406	222.411	430.917	43.1078	169.844	55.3355	12.2315	48.0262
	67.2831	1.63959	177.759	1.0241	2.68725	29.5164	34.0497	20.0556	30.1836	553.645	451.78	0	225.492	1.7135	2.68601	605.014	443.68	0.9611	70.9294	0	118.406	222.7	432.115	40.8636	170.614	54.9629	11.5572	48.0625
	67.2831	1.47563	177.759	1.0241	2.68725	29.5164	34.0497	20.0556	30.1836	553.645	451.78	0	225.492	1.7135	2.68601	605.014	443.68	0.9611	70.9294	0	118.406	222.963	433.202	38.8279	171.313	54.6276	10.9493	48.0952
	67.2831	1.32807	177.759	1.0241	2.68725	29.5164	34.0497	20.0556	30.1836	553.645	451.78	0	225.492	1.7135	2.68601	605.014	443.68	0.9611	70.9294	0	118.406	223.201	434.189	36.9831	171.947	54.326	10.4014	48.1248
	67.2831	1.19526	177.759	1.0241	2.68725	29.5164	34.0497	20.0556	30.1836	553.645	451.78	0	225.492	1.7135	2.68601	605.014	443.68	0.9611	70.9294	0	118.406	223.417	435.086	35.3129	172.52	54.0547	9.90795	48.1514
	67.2831	1.07574	177.759	1.0241	2.68725	29.5164	34.0497	20.0556	30.1836	553.645	451.78	0	225.492	1.7135	2.68601	605.014	443.68	0.9611	70.9294	0	118.406	223.614	435.899	33.8021	173.039	53.8109	9.46357	48.1755
	67.2831	0.968163	177.759	1.0241	2.68725	29.5164	34.0497	20.0556	30.1836	553.645	451.78	0	225.492	1.7135	2.68601	605.014	443.68	0.9611	70.9294	0	118.406	223.792	436.636	32.4364	173.508	53.5917	9.06353	48.1973
	67.2831	0.871347	177.759	1.0241	2.68725	29.5164	34.0497	20.0556	30.1836	553.645	451.78	0	225.492	1.7135	2.68601	605.014	443.68	0.9611	70.9294	0	118.406	223.953	437.305	31.2027	173.932	53.3947	8.70351	48.2169
	67.2831	0.784212	177.759	1.0241	2.68725	29.5164	34.0497	20.0556	30.1836	553.645	451.78	0	225.492	1.7135	2.68601	605.014	443.68	0.9611	70.9294	0	118.406	224.099	437.911	30.0891	174.314	53.2178	8.37959	48.2347
	67.2831	0.705791	177.759	1.0241	2.68725	29.5164	34.0497	20.0556	30.1836	553.645	451.78	0	225.492	1.7135	2.68601	605.014	443.68	0.9611	70.9294	0	118.406	224.232	438.46	29.0843	174.659	53.0588	8.08822	48.2507
	67.2831	0.635212	177.759	1.0241	2.68725	29.5164	34.0497	20.0556	30.1836	553.645	451.78	0	225.492	1.7135	2.68601	605.014	443.68	0.9611	70.9294	0	118.406	224.352	438.957	28.1782	174.97	52.916	7.82617	48.2651
	67.2831	0.571691	177.759	1.0241	2.68725	29.5164	34.0497	20.0556	30.1836	553.645	451.78	0	225.492	1.7135	2.68601	605.014	443.68	0.9611	70.9294	0	118.406	224.46	439.408	27.3615	175.251	52.7877	7.59054	48.2782
	67.2831	0.514522	177.759	1.0241	2.68725	29.5164	34.0497	20.0556	30.1836	553.645	451.78	0	225.492	1.7135	2.68601	605.014	443.68	0.9611	70.9294	0	118.406	224.559	439.815	26.6256	175.503	52.6725	7.37871	48.29
	67.2831	0.463069	177.759	1.0241	2.68725	29.5164	34.0497	20.0556	30.1836	553.645	451.78	0	225.492	1.7135	2.68601	605.014	443.68	0.9611	70.9294	0	118.406	224.648	440.185	25.9628	175.731	52.5691	7.18829	48.3007
	67.2831	0.416762	177.759	1.0241	2.68725	29.5164	34.0497	20.0556	30.1836	553.645	451.78	0	225.492	1.7135	2.68601	605.014	443.68	0.9611	70.9294	0	118.406	224.729	440.519	25.366	175.936	52.4763	7.01715	48.3103
	67.2831	0.375086	177.759	1.0241	2.68725	29.5164	34.0497	20.0556	30.1836	553.645	451.78	0	225.492	1.7135	2.68601	605.014	443.68	0.9611	70.9294	0	118.406	224.802	440.821	24.8289	176.12	52.3929	6.86335	48.319
	67.2831	0.337578	177.759	1.0241	2.68725	29.5164	34.0497	20.0556	30.1836	553.645	451.78	0	225.492	1.7135	2.68601	605.014	443.68	0.9611	70.9294	0	118.406	224.868	441.095	24.3455	176.286	52.3181	6.72515	48.3269
	67.2831	0.30382	177.759	1.0241	2.68725	29.5164	34.0497	20.0556	30.1836	553.645	451.78	0	225.492	1.7135	2.68601	605.014	443.68	0.9611	70.9294	0	118.406	224.928	441.343	23.9106	176.436	52.251	6.60097	48.334
	67.2831	0.273438	177.759	1.0241	2.68725	29.5164	34.0497	20.0556	30.1836	553.645	451.78	0	225.492	1.7135	2.68601	605.014	443.68	0.9611	70.9294	0	118.406	224.982	441.567	23.5195	176.57	52.1907	6.48942	48.3404
	67.2831	0.246094	177.759	1.0241	2.68725	29.5164	34.0497	20.0556	30.1836	553.645	451.78	0	225.492	1.7135	2.68601	605.014	443.68	0.9611	70.9294	0	118.406	225.03	441.769	23.1678	176.691	52.1366	6.3892	48.3462
	67.2831	0.221485	177.759	1.0241	2.68725	29.5164	34.0497	20.0556	30.1836	553.645	451.78	0	225.492	1.7135	2.68601	605.014	443.68	0.9611	70.9294	0	118.406	225.075	441.952	22.8515	176.799	52.0881	6.29918	48.3514
	67.2831	0.199336	177.759	1.0241	2.68725	29.5164	34.0497	20.0556	30.1836	553.645	451.78	0	225.492	1.7135	2.68601	605.014	443.68	0.9611	70.9294	0	118.406	225.115	442.118	22.5672	176.897	52.0445	6.21833	48.3561
	67.2831	0.179403	177.759	1.0241	2.68725	29.5164	34.0497	20.0556	30.1836	553.645	451.78	0	225.492	1.7135	2.68601	605.014	443.68	0.9611	70.9294	0	118.406	225.151	442.268	22.3117	176.985	52.0054	6.1457	48.3604
	67.2831	0.161462	177.759	1.0241	2.68725	29.5164	34.0497	20.0556	30.1836	553.645	451.78	0	225.492	1.7135	2.68601	605.014	443.68	0.9611	70.9294	0	118.406	225.184	442.404	22.082	177.063	51.9703	6.08048	48.3643
	67.2831	0.145316	177.759	1.0241	2.68725	29.5164	34.0497	20.0556	30.1836	553.645	451.78	0	225.492	1.7135	2.68601	605.014	443.68	0.9611	70.9294	0	118.406	225.213	442.526	21.8756	177.134	51.9389	6.0219	48.3678
	67.2831	0.130784	177.759	1.0241	2.68725	29.5164	34.0497	20.0556	30.1836	553.645	451.78	0	225.492	1.7135	2.68601	605.014	443.68	0.9611	70.9294	0	118.406	225.24	442.637	21.6902	177.198	51.9106	5.96929	48.3709
	67.2831	0.117706	177.759	1.0241	2.68725	29.5164	34.0497	20.0556	30.1836	553.645	451.78	0	225.492	1.7135	2.68601	605.014	443.68	0.9611	70.9294	0	118.406	225.264	442.737	21.5235	177.255	51.8853	5.92206	48.3738

## Sheet: s15
		S	K1	Hilli1 x	Hill2 x	K1is	K1ii	V1	Kx1	Kx2	V1is	V1ii	K2	Hill1	Hill2	K3	V2	Hill xx	Kxx1	V2i	K2i			residual
		42.2831	177.759	1.0241	2.68725	29.5164	34.0497	20.0556	30.1836	553.645	451.78		225.492	1.7135	2.68601	605.014	443.68	0.9611	70.9294		118.406			1260.54
																								105.994
																														coorelation	0.993354
	S	I	K1	Hilli1 x	Hill2 x	K1is	K1ii	V1	Kx1	Kx2	V1is	V1ii	K2	Hill1	Hill2	K3	V2	Hill xx	Kxx1	V2i	K2i	K2 term	V2 term	V1 term	K1 term	cal	obs
42.2831	57.2831	0.33	177.759	1.0241	2.68725	29.5164	34.0497	20.0556	30.1836	553.645	451.78	0	225.492	1.7135	2.68601	605.014	443.68	0.9611	70.9294	0	118.406	224.881	441.15	24.2479	176.32	41.6823	40.7505	0.931737			41.6823	40.7505	0.931737		0.931737			41.6823	40.7505	0.931737
	57.2831	1	177.759	1.0241	2.68725	29.5164	34.0497	20.0556	30.1836	553.645	451.78	0	225.492	1.7135	2.68601	605.014	443.68	0.9611	70.9294	0	118.406	223.739	436.417	32.8411	173.369	43.016	41.8023	1.2137			43.016	41.8023	1.2137		1.2137			43.016	41.8023	1.2137
	57.2831	3.33	177.759	1.0241	2.68725	29.5164	34.0497	20.0556	30.1836	553.645	451.78	0	225.492	1.7135	2.68601	605.014	443.68	0.9611	70.9294	0	118.406	220.113	421.396	60.9432	163.719	47.6968	50.0513	2.35447			47.6968	50.0513	2.35447		-2.35447			177.365	170.004	7.36159
	57.2831	6.66	177.759	1.0241	2.68725	29.5164	34.0497	20.0556	30.1836	553.645	451.78	0	225.492	1.7135	2.68601	605.014	443.68	0.9611	70.9294	0	118.406	215.496	402.268	95.7914	151.753	54.2263	55.4699	1.24361			54.2263	55.4699	1.24361		-1.24361			177.34	170.019	7.32115
	57.2831	10	177.759	1.0241	2.68725	29.5164	34.0497	20.0556	30.1836	553.645	451.78	0	225.492	1.7135	2.68601	605.014	443.68	0.9611	70.9294	0	118.406	211.35	385.089	125.35	141.601	60.4787	58.8093	1.66934			60.4787	58.8093	1.66934		1.66934			124.802	120.407	4.39432
	57.2831	21	177.759	1.0241	2.68725	29.5164	34.0497	20.0556	30.1836	553.645	451.78	0	225.492	1.7135	2.68601	605.014	443.68	0.9611	70.9294	0	118.406	200.124	338.577	196.206	117.251	78.7353	79.898	1.16262			78.7353	79.898	1.16262		-1.16262			125.567	121.78	3.78729
	57.2831	33.3	177.759	1.0241	2.68725	29.5164	34.0497	20.0556	30.1836	553.645	451.78	0	225.492	1.7135	2.68601	605.014	443.68	0.9611	70.9294	0	118.406	190.591	299.077	246.533	99.914	95.2469	87.8474	7.39942			95.2469	87.8474	7.39942		7.39942			92.1403	90.5718	1.56847
	57.2831	45	177.759	1.0241	2.68725	29.5164	34.0497	20.0556	30.1836	553.645	451.78	0	225.492	1.7135	2.68601	605.014	443.68	0.9611	70.9294	0	118.406	183.473	269.589	278.924	88.6935	107.856	100.586	7.27025			107.856	100.586	7.27025		7.27025			93.2874	90.5817	2.70568
	57.2831	66.6	177.759	1.0241	2.68725	29.5164	34.0497	20.0556	30.1836	553.645	451.78	0	225.492	1.7135	2.68601	605.014	443.68	0.9611	70.9294	0	118.406	173.569	228.552	317.38	75.1591	125.303	134.869	9.56566			125.303	134.869	9.56566		-9.56566			52.303	50.7148	1.58825
	57.2831	100	177.759	1.0241	2.68725	29.5164	34.0497	20.0556	30.1836	553.645	451.78	0	225.492	1.7135	2.68601	605.014	443.68	0.9611	70.9294	0	118.406	163.19	185.551	349.384	63.176	142.454	132.816	9.6381			142.454	132.816	9.6381		9.6381			53.6565	51.7165	1.94006
	57.2831	333	177.759	1.0241	2.68725	29.5164	34.0497	20.0556	30.1836	553.645	451.78	0	225.492	1.7135	2.68601	605.014	443.68	0.9611	70.9294	0	118.406	138.161	81.849	325.937	42.1199	143.466	133.712	9.75492			143.466	133.712	9.75492		9.75492			85.6657	89.641	3.97523
	57.2831	450	177.759	1.0241	2.68725	29.5164	34.0497	20.0556	30.1836	553.645	451.78	0	225.492	1.7135	2.68601	605.014	443.68	0.9611	70.9294	0	118.406	133.916	64.2607	261.695	39.9332	116.728	115.38	1.34761			116.728	115.38	1.34761		1.34761			85.5672	89.2396	3.67248
	57.2831	666	177.759	1.0241	2.68725	29.5164	34.0497	20.0556	30.1836	553.645	451.78	0	225.492	1.7135	2.68601	605.014	443.68	0.9611	70.9294	0	118.406	129.554	46.1867	153.508	38.3185	70.6402	60.4636	10.1766			70.6402	60.4636	10.1766		10.1766			139.271	139.926	0.654983
	57.2831	800	177.759	1.0241	2.68725	29.5164	34.0497	20.0556	30.1836	553.645	451.78	0	225.492	1.7135	2.68601	605.014	443.68	0.9611	70.9294	0	118.406	127.913	39.388	107.924	37.8151	51.1243	47.3933	3.73101			51.1243	47.3933	3.73101		3.73101			139.139	139.774	0.634655
	57.2831	1000	177.759	1.0241	2.68725	29.5164	34.0497	20.0556	30.1836	553.645	451.78	0	225.492	1.7135	2.68601	605.014	443.68	0.9611	70.9294	0	118.406	126.211	32.3393	64.9478	37.2826	32.5906	38.2224	5.63186			32.5906	38.2224	5.63186		-5.63186			215.518	229.948	14.4301
	57.2831	1800	177.759	1.0241	2.68725	29.5164	34.0497	20.0556	30.1836	553.645	451.78	0	225.492	1.7135	2.68601	605.014	443.68	0.9611	70.9294	0	118.406	122.987	18.9788	11.7789	36.0856	8.72363	6.98019	1.74344			8.72363	6.98019	1.74344		1.74344			215.41	229.926	14.5162
	57.2831	3333	177.759	1.0241	2.68725	29.5164	34.0497	20.0556	30.1836	553.645	451.78	0	225.492	1.7135	2.68601	605.014	443.68	0.9611	70.9294	0	118.406	120.989	10.7028	0.13867	35.2026	2.36299	1.58413	0.77886			2.36299	1.58413	0.77886		0.77886			202.713	189.983	12.7303
	57.2831	6666	177.759	1.0241	2.68725	29.5164	34.0497	20.0556	30.1836	553.645	451.78	0	225.492	1.7135	2.68601	605.014	443.68	0.9611	70.9294	0	118.406	119.749	5.56291	-1.14668	34.6311	0.754069	-0.87053	1.6246			0.754069	-0.87053	1.6246		1.6246			202.56	189.742	12.8178
	57.2831	10000	177.759	1.0241	2.68725	29.5164	34.0497	20.0556	30.1836	553.645	451.78	0	225.492	1.7135	2.68601	605.014	443.68	0.9611	70.9294	0	118.406	119.319	3.78251	-0.94061	34.4359	0.451661	-2.04987	2.50153			0.451661	-2.04987	2.50153		2.50153			26.8492	31.7827	4.9335
	57.2831	21000	177.759	1.0241	2.68725	29.5164	34.0497	20.0556	30.1836	553.645	451.78	0	225.492	1.7135	2.68601	605.014	443.68	0.9611	70.9294	0	118.406	118.855	1.86203	-0.503516	34.2312	0.208045	-0.88168	1.08973			0.208045	-0.88168	1.08973		1.08973			28.0631	32.8796	4.81645
	57.2831	33000	177.759	1.0241	2.68725	29.5164	34.0497	20.0556	30.1836	553.645	451.78	0	225.492	1.7135	2.68601	605.014	443.68	0.9611	70.9294	0	118.406	118.698	1.20773	-0.325684	34.1641	0.135759	-0.45213	0.587889			0.135759	-0.45213	0.587889		0.587889
	57.2831	100000	177.759	1.0241	2.68725	29.5164	34.0497	20.0556	30.1836	553.645	451.78	0	225.492	1.7135	2.68601	605.014	443.68	0.9611	70.9294	0	118.406	118.507	0.41686	-0.10677	34.0865	0.0493285	-0.18626	0.235588			0.0493285	-0.18626	0.235588		0.235588
																												81.417		155	177.365	170.004	7.36159		7.36159
																															177.34	170.019	7.32115		7.32115
	57.2831	50000	177.759	1.0241	2.68725	29.5164	34.0497	20.0556	30.1836	553.645	451.78	0	225.492	1.7135	2.68601	605.014	443.68	0.9611	70.9294	0	118.406	118.602	0.810819	-0.215366	34.1245	0.0926555					177.246	170.178	7.06765		7.06765
	57.2831	45000	177.759	1.0241	2.68725	29.5164	34.0497	20.0556	30.1836	553.645	451.78	0	225.492	1.7135	2.68601	605.014	443.68	0.9611	70.9294	0	118.406	118.623	0.897051	-0.239354	34.133	0.102027					177.095	170.319	6.77573		6.77573
	57.2831	40500	177.759	1.0241	2.68725	29.5164	34.0497	20.0556	30.1836	553.645	451.78	0	225.492	1.7135	2.68601	605.014	443.68	0.9611	70.9294	0	118.406	118.646	0.992432	-0.265898	34.1425	0.112379					176.876	171.088	5.7886		5.7886
	57.2831	36450	177.759	1.0241	2.68725	29.5164	34.0497	20.0556	30.1836	553.645	451.78	0	225.492	1.7135	2.68601	605.014	443.68	0.9611	70.9294	0	118.406	118.671	1.09793	-0.295229	34.153	0.123827					176.913	174.55	2.36327		2.36327
	57.2831	32805	177.759	1.0241	2.68725	29.5164	34.0497	20.0556	30.1836	553.645	451.78	0	225.492	1.7135	2.68601	605.014	443.68	0.9611	70.9294	0	118.406	118.699	1.21461	-0.327589	34.1648	0.136508					177.097	176.827	0.270235		0.270235
	57.2831	29524.5	177.759	1.0241	2.68725	29.5164	34.0497	20.0556	30.1836	553.645	451.78	0	225.492	1.7135	2.68601	605.014	443.68	0.9611	70.9294	0	118.406	118.73	1.34366	-0.363219	34.1779	0.150577					177.473	181.137	3.66427		-3.66427
	57.2831	26572	177.759	1.0241	2.68725	29.5164	34.0497	20.0556	30.1836	553.645	451.78	0	225.492	1.7135	2.68601	605.014	443.68	0.9611	70.9294	0	118.406	118.765	1.48637	-0.402358	34.1925	0.166221					176.65	184.707	8.05649		-8.05649
	57.2831	23914.8	177.759	1.0241	2.68725	29.5164	34.0497	20.0556	30.1836	553.645	451.78	0	225.492	1.7135	2.68601	605.014	443.68	0.9611	70.9294	0	118.406	118.803	1.64418	-0.445225	34.2087	0.18366					174.796	191.385	16.5895		-16.5895
	57.2831	21523.4	177.759	1.0241	2.68725	29.5164	34.0497	20.0556	30.1836	553.645	451.78	0	225.492	1.7135	2.68601	605.014	443.68	0.9611	70.9294	0	118.406	118.845	1.81867	-0.492006	34.2267	0.203159					169.819	164.031	5.78859		5.78859
	57.2831	19371	177.759	1.0241	2.68725	29.5164	34.0497	20.0556	30.1836	553.645	451.78	0	225.492	1.7135	2.68601	605.014	443.68	0.9611	70.9294	0	118.406	118.892	2.0116	-0.542832	34.2468	0.225041					160.807	156.613	4.19404		4.19404
	57.2831	17433.9	177.759	1.0241	2.68725	29.5164	34.0497	20.0556	30.1836	553.645	451.78	0	225.492	1.7135	2.68601	605.014	443.68	0.9611	70.9294	0	118.406	118.943	2.2249	-0.597743	34.2692	0.249699					106.572	97.784	8.78752		8.78752
	57.2831	15690.5	177.759	1.0241	2.68725	29.5164	34.0497	20.0556	30.1836	553.645	451.78	0	225.492	1.7135	2.68601	605.014	443.68	0.9611	70.9294	0	118.406	119	2.46068	-0.656651	34.294	0.277621					84.2906	70.773	13.5177		13.5177
	57.2831	14121.5	177.759	1.0241	2.68725	29.5164	34.0497	20.0556	30.1836	553.645	451.78	0	225.492	1.7135	2.68601	605.014	443.68	0.9611	70.9294	0	118.406	119.063	2.7213	-0.719271	34.3217	0.309416					54.1723	58.348	4.17567		-4.17567
	57.2831	12709.3	177.759	1.0241	2.68725	29.5164	34.0497	20.0556	30.1836	553.645	451.78	0	225.492	1.7135	2.68601	605.014	443.68	0.9611	70.9294	0	118.406	119.132	3.00933	-0.785049	34.3524	0.34585					42.2791	40.6515	1.62758		1.62758
	57.2831	11438.4	177.759	1.0241	2.68725	29.5164	34.0497	20.0556	30.1836	553.645	451.78	0	225.492	1.7135	2.68601	605.014	443.68	0.9611	70.9294	0	118.406	119.209	3.32762	-0.853049	34.3866	0.387893					30.8495	20.277	10.5725		10.5725
	57.2831	10294.6	177.759	1.0241	2.68725	29.5164	34.0497	20.0556	30.1836	553.645	451.78	0	225.492	1.7135	2.68601	605.014	443.68	0.9611	70.9294	0	118.406	119.294	3.6793	-0.921804	34.4247	0.436784					14.0487	13.0681	0.980633		0.980633
	57.2831	9265.1	177.759	1.0241	2.68725	29.5164	34.0497	20.0556	30.1836	553.645	451.78	0	225.492	1.7135	2.68601	605.014	443.68	0.9611	70.9294	0	118.406	119.388	4.06779	-0.989121	34.4669	0.494116					6.98864	0.53158	6.45706		6.45706
	57.2831	8338.59	177.759	1.0241	2.68725	29.5164	34.0497	20.0556	30.1836	553.645	451.78	0	225.492	1.7135	2.68601	605.014	443.68	0.9611	70.9294	0	118.406	119.491	4.49689	-1.05182	34.5138	0.561939					3.47141	1.05899	2.41242		2.41242
	57.2831	7504.73	177.759	1.0241	2.68725	29.5164	34.0497	20.0556	30.1836	553.645	451.78	0	225.492	1.7135	2.68601	605.014	443.68	0.9611	70.9294	0	118.406	119.606	4.97074	-1.10536	34.5658	0.642916					2.34183	6.41886	4.07703		-4.07703
	57.2831	6754.26	177.759	1.0241	2.68725	29.5164	34.0497	20.0556	30.1836	553.645	451.78	0	225.492	1.7135	2.68601	605.014	443.68	0.9611	70.9294	0	118.406	119.732	5.49389	-1.14342	34.6235	0.740508					1.14972	0.21576	0.933964		0.933964
	57.2831	6078.83	177.759	1.0241	2.68725	29.5164	34.0497	20.0556	30.1836	553.645	451.78	0	225.492	1.7135	2.68601	605.014	443.68	0.9611	70.9294	0	118.406	119.871	6.07135	-1.15721	34.6874	0.859228					0.746503	0.0153	0.731203		0.731203
	57.2831	5470.95	177.759	1.0241	2.68725	29.5164	34.0497	20.0556	30.1836	553.645	451.78	0	225.492	1.7135	2.68601	605.014	443.68	0.9611	70.9294	0	118.406	120.025	6.70856	-1.13472	34.7582	1.00498					0.258764	0.00538	0.253384		0.253384
	57.2831	4923.85	177.759	1.0241	2.68725	29.5164	34.0497	20.0556	30.1836	553.645	451.78	0	225.492	1.7135	2.68601	605.014	443.68	0.9611	70.9294	0	118.406	120.195	7.41153	-1.05955	34.8364	1.18548				92	124.802	120.407	4.39432		4.39432
	57.2831	4431.47	177.759	1.0241	2.68725	29.5164	34.0497	20.0556	30.1836	553.645	451.78	0	225.492	1.7135	2.68601	605.014	443.68	0.9611	70.9294	0	118.406	120.382	8.18678	-0.909593	34.9228	1.41084					125.567	121.78	3.78729		3.78729
	57.2831	3988.32	177.759	1.0241	2.68725	29.5164	34.0497	20.0556	30.1836	553.645	451.78	0	225.492	1.7135	2.68601	605.014	443.68	0.9611	70.9294	0	118.406	120.588	9.04144	-0.655096	35.018	1.69432					128.371	122.302	6.06936		6.06936
	57.2831	3589.49	177.759	1.0241	2.68725	29.5164	34.0497	20.0556	30.1836	553.645	451.78	0	225.492	1.7135	2.68601	605.014	443.68	0.9611	70.9294	0	118.406	120.816	9.98327	-0.256315	35.1228	2.05324					132.366	129.86	2.50669		2.50669
	57.2831	3230.54	177.759	1.0241	2.68725	29.5164	34.0497	20.0556	30.1836	553.645	451.78	0	225.492	1.7135	2.68601	605.014	443.68	0.9611	70.9294	0	118.406	121.066	11.0207	0.339565	35.2377	2.51024					136.173	134.842	1.33143		1.33143
	57.2831	2907.49	177.759	1.0241	2.68725	29.5164	34.0497	20.0556	30.1836	553.645	451.78	0	225.492	1.7135	2.68601	605.014	443.68	0.9611	70.9294	0	118.406	121.342	12.163	1.20229	35.3636	3.09479					146.667	144.065	2.60204		2.60204
	57.2831	2616.74	177.759	1.0241	2.68725	29.5164	34.0497	20.0556	30.1836	553.645	451.78	0	225.492	1.7135	2.68601	605.014	443.68	0.9611	70.9294	0	118.406	121.645	13.4199	2.42333	35.5008	3.84511					154.819	151.059	3.76035		3.76035
	57.2831	2355.06	177.759	1.0241	2.68725	29.5164	34.0497	20.0556	30.1836	553.645	451.78	0	225.492	1.7135	2.68601	605.014	443.68	0.9611	70.9294	0	118.406	121.979	14.8023	4.12159	35.65	4.81042					159.881	163.857	3.97641		-3.97641
	57.2831	2119.56	177.759	1.0241	2.68725	29.5164	34.0497	20.0556	30.1836	553.645	451.78	0	225.492	1.7135	2.68601	605.014	443.68	0.9611	70.9294	0	118.406	122.345	16.3217	6.45011	35.8113	6.05361					164.744	176.421	11.6774		-11.6774
	57.2831	1907.6	177.759	1.0241	2.68725	29.5164	34.0497	20.0556	30.1836	553.645	451.78	0	225.492	1.7135	2.68601	605.014	443.68	0.9611	70.9294	0	118.406	122.748	17.9906	9.60311	35.9848	7.65404					166.043	181.781	15.7378		-15.7378
	57.2831	1716.84	177.759	1.0241	2.68725	29.5164	34.0497	20.0556	30.1836	553.645	451.78	0	225.492	1.7135	2.68601	605.014	443.68	0.9611	70.9294	0	118.406	123.19	19.8221	13.8228	36.1703	9.71029					127.634	124.604	3.03015		3.03015
	57.2831	1545.16	177.759	1.0241	2.68725	29.5164	34.0497	20.0556	30.1836	553.645	451.78	0	225.492	1.7135	2.68601	605.014	443.68	0.9611	70.9294	0	118.406	123.675	21.8305	19.4041	36.3672	12.3421					101.654	122.498	20.8446		-20.8446
	57.2831	1390.64	177.759	1.0241	2.68725	29.5164	34.0497	20.0556	30.1836	553.645	451.78	0	225.492	1.7135	2.68601	605.014	443.68	0.9611	70.9294	0	118.406	124.206	24.0309	26.6946	36.5747	15.6907					63.3238	85.2576	21.9338		-21.9338
	57.2831	1251.58	177.759	1.0241	2.68725	29.5164	34.0497	20.0556	30.1836	553.645	451.78	0	225.492	1.7135	2.68601	605.014	443.68	0.9611	70.9294	0	118.406	124.787	26.4392	36.0857	36.7918	19.9149					47.8369	61.6338	13.7969		-13.7969
	57.2831	1126.42	177.759	1.0241	2.68725	29.5164	34.0497	20.0556	30.1836	553.645	451.78	0	225.492	1.7135	2.68601	605.014	443.68	0.9611	70.9294	0	118.406	125.423	29.0721	47.9894	37.0176	25.1829					33.1073	19.1617	13.9456		13.9456
	57.2831	1013.78	177.759	1.0241	2.68725	29.5164	34.0497	20.0556	30.1836	553.645	451.78	0	225.492	1.7135	2.68601	605.014	443.68	0.9611	70.9294	0	118.406	126.117	31.9472	62.7948	37.2516	31.6546					12.8273	8.10916	4.71819		4.71819
	57.2831	912.4	177.759	1.0241	2.68725	29.5164	34.0497	20.0556	30.1836	553.645	451.78	0	225.492	1.7135	2.68601	605.014	443.68	0.9611	70.9294	0	118.406	126.873	35.0825	80.8017	37.4946	39.455					5.67794	8.82756	3.14962		-3.14962
	57.2831	821.16	177.759	1.0241	2.68725	29.5164	34.0497	20.0556	30.1836	553.645	451.78	0	225.492	1.7135	2.68601	605.014	443.68	0.9611	70.9294	0	118.406	127.698	38.4967	102.134	37.7495	48.6385					2.67552	-2.20989	4.88541		4.88541
	57.2831	739.044	177.759	1.0241	2.68725	29.5164	34.0497	20.0556	30.1836	553.645	451.78	0	225.492	1.7135	2.68601	605.014	443.68	0.9611	70.9294	0	118.406	128.593	42.2089	126.647	38.0222	59.1493					1.78596	-0.83753	2.62349		2.62349
	57.2831	665.14	177.759	1.0241	2.68725	29.5164	34.0497	20.0556	30.1836	553.645	451.78	0	225.492	1.7135	2.68601	605.014	443.68	0.9611	70.9294	0	118.406	129.566	46.2382	153.855	38.3224	70.7885					0.872664	-0.44512	1.31778		1.31778
	57.2831	598.626	177.759	1.0241	2.68725	29.5164	34.0497	20.0556	30.1836	553.645	451.78	0	225.492	1.7135	2.68601	605.014	443.68	0.9611	70.9294	0	118.406	130.62	50.6036	182.92	38.6638	83.204					0.567	-0.16055	0.72755		0.72755
	57.2831	538.763	177.759	1.0241	2.68725	29.5164	34.0497	20.0556	30.1836	553.645	451.78	0	225.492	1.7135	2.68601	605.014	443.68	0.9611	70.9294	0	118.406	131.759	55.3238	212.713	39.0632	95.9129					0.197403	-0.0615	0.258903		0.258903
	57.2831	484.887	177.759	1.0241	2.68725	29.5164	34.0497	20.0556	30.1836	553.645	451.78	0	225.492	1.7135	2.68601	605.014	443.68	0.9611	70.9294	0	118.406	132.988	60.4167	241.965	39.5392	108.362				61	92.1403	90.5718	1.56847		1.56847
	57.2831	436.398	177.759	1.0241	2.68725	29.5164	34.0497	20.0556	30.1836	553.645	451.78	0	225.492	1.7135	2.68601	605.014	443.68	0.9611	70.9294	0	118.406	134.311	65.8988	269.458	40.1105	120.008					93.2874	90.5817	2.70568		2.70568
	57.2831	392.758	177.759	1.0241	2.68725	29.5164	34.0497	20.0556	30.1836	553.645	451.78	0	225.492	1.7135	2.68601	605.014	443.68	0.9611	70.9294	0	118.406	135.732	71.7852	294.194	40.7936	130.399					97.3595	97.5197	0.160177		-0.160177
	57.2831	353.483	177.759	1.0241	2.68725	29.5164	34.0497	20.0556	30.1836	553.645	451.78	0	225.492	1.7135	2.68601	605.014	443.68	0.9611	70.9294	0	118.406	137.253	78.0887	315.51	41.6022	139.225					103.048	97.6393	5.40867		5.40867
	57.2831	318.134	177.759	1.0241	2.68725	29.5164	34.0497	20.0556	30.1836	553.645	451.78	0	225.492	1.7135	2.68601	605.014	443.68	0.9611	70.9294	0	118.406	138.878	84.8194	333.094	42.5464	146.333					108.447	101.798	6.64861		6.64861
	57.2831	286.321	177.759	1.0241	2.68725	29.5164	34.0497	20.0556	30.1836	553.645	451.78	0	225.492	1.7135	2.68601	605.014	443.68	0.9611	70.9294	0	118.406	140.607	91.9844	346.943	43.6339	151.712					123.652	122.64	1.01237		1.01237
	57.2831	257.689	177.759	1.0241	2.68725	29.5164	34.0497	20.0556	30.1836	553.645	451.78	0	225.492	1.7135	2.68601	605.014	443.68	0.9611	70.9294	0	118.406	142.442	99.5866	357.272	44.8699	155.452					136.363	124.498	11.8651		11.8651
	57.2831	231.92	177.759	1.0241	2.68725	29.5164	34.0497	20.0556	30.1836	553.645	451.78	0	225.492	1.7135	2.68601	605.014	443.68	0.9611	70.9294	0	118.406	144.382	107.625	364.426	46.2584	157.71					145.205	134.985	10.2205		10.2205
	57.2831	208.728	177.759	1.0241	2.68725	29.5164	34.0497	20.0556	30.1836	553.645	451.78	0	225.492	1.7135	2.68601	605.014	443.68	0.9611	70.9294	0	118.406	146.426	116.093	368.8	47.803	158.666					155.869	154.727	1.14175		1.14175
	57.2831	187.855	177.759	1.0241	2.68725	29.5164	34.0497	20.0556	30.1836	553.645	451.78	0	225.492	1.7135	2.68601	605.014	443.68	0.9611	70.9294	0	118.406	148.571	124.98	370.787	49.5067	158.504					163.828	164.287	0.458986		-0.458986
	57.2831	169.07	177.759	1.0241	2.68725	29.5164	34.0497	20.0556	30.1836	553.645	451.78	0	225.492	1.7135	2.68601	605.014	443.68	0.9611	70.9294	0	118.406	150.813	134.268	370.746	51.3726	157.398					138.58	167.94	29.3597		-29.3597
	57.2831	152.163	177.759	1.0241	2.68725	29.5164	34.0497	20.0556	30.1836	553.645	451.78	0	225.492	1.7135	2.68601	605.014	443.68	0.9611	70.9294	0	118.406	153.146	143.934	368.988	53.4037	155.499					111.069	100.082	10.9873		10.9873
	57.2831	136.946	177.759	1.0241	2.68725	29.5164	34.0497	20.0556	30.1836	553.645	451.78	0	225.492	1.7135	2.68601	605.014	443.68	0.9611	70.9294	0	118.406	155.563	153.951	365.771	55.6025	152.943					68.1998	89.8725	21.6726		-21.6726
	57.2831	123.252	177.759	1.0241	2.68725	29.5164	34.0497	20.0556	30.1836	553.645	451.78	0	225.492	1.7135	2.68601	605.014	443.68	0.9611	70.9294	0	118.406	158.057	164.282	361.306	57.971	149.842					50.6032	32.5075	18.0957		18.0957
	57.2831	110.927	177.759	1.0241	2.68725	29.5164	34.0497	20.0556	30.1836	553.645	451.78	0	225.492	1.7135	2.68601	605.014	443.68	0.9611	70.9294	0	118.406	160.617	174.888	355.762	60.5103	146.296					33.9127	39.3303	5.41764		-5.41764
	57.2831	99.8339	177.759	1.0241	2.68725	29.5164	34.0497	20.0556	30.1836	553.645	451.78	0	225.492	1.7135	2.68601	605.014	443.68	0.9611	70.9294	0	118.406	163.232	185.724	349.275	63.22	142.39					11.6314	4.84674	6.78469		6.78469
	57.2831	89.8505	177.759	1.0241	2.68725	29.5164	34.0497	20.0556	30.1836	553.645	451.78	0	225.492	1.7135	2.68601	605.014	443.68	0.9611	70.9294	0	118.406	165.891	196.74	341.957	66.0985	138.2					4.58182	2.79073	1.79109		1.79109
	57.2831	80.8655	177.759	1.0241	2.68725	29.5164	34.0497	20.0556	30.1836	553.645	451.78	0	225.492	1.7135	2.68601	605.014	443.68	0.9611	70.9294	0	118.406	168.58	207.882	333.899	69.142	133.791					2.02536	0.10208	1.92328		1.92328
	57.2831	72.7789	177.759	1.0241	2.68725	29.5164	34.0497	20.0556	30.1836	553.645	451.78	0	225.492	1.7135	2.68601	605.014	443.68	0.9611	70.9294	0	118.406	171.287	219.096	325.181	72.3446	129.227					1.33311	-1.41923	2.75234		2.75234
	57.2831	65.501	177.759	1.0241	2.68725	29.5164	34.0497	20.0556	30.1836	553.645	451.78	0	225.492	1.7135	2.68601	605.014	443.68	0.9611	70.9294	0	118.406	173.996	230.323	315.874	75.6983	124.562					0.646973	-0.63528	1.28225		1.28225
	57.2831	58.9509	177.759	1.0241	2.68725	29.5164	34.0497	20.0556	30.1836	553.645	451.78	0	225.492	1.7135	2.68601	605.014	443.68	0.9611	70.9294	0	118.406	176.696	241.508	306.045	79.1926	119.848					0.420655	-0.32971	0.750365		0.750365
	57.2831	53.0558	177.759	1.0241	2.68725	29.5164	34.0497	20.0556	30.1836	553.645	451.78	0	225.492	1.7135	2.68601	605.014	443.68	0.9611	70.9294	0	118.406	179.371	252.592	295.759	82.8144	115.132					0.147257	-0.1403	0.287557		0.287557
	57.2831	47.7502	177.759	1.0241	2.68725	29.5164	34.0497	20.0556	30.1836	553.645	451.78	0	225.492	1.7135	2.68601	605.014	443.68	0.9611	70.9294	0	118.406	182.009	263.522	285.082	86.5484	110.457				25	52.303	50.7148	1.58825		1.58825
	57.2831	42.9752	177.759	1.0241	2.68725	29.5164	34.0497	20.0556	30.1836	553.645	451.78	0	225.492	1.7135	2.68601	605.014	443.68	0.9611	70.9294	0	118.406	184.598	274.247	274.082	90.3769	105.859					53.6565	51.7165	1.94006		1.94006
	57.2831	38.6777	177.759	1.0241	2.68725	29.5164	34.0497	20.0556	30.1836	553.645	451.78	0	225.492	1.7135	2.68601	605.014	443.68	0.9611	70.9294	0	118.406	187.125	284.718	262.826	94.2804	101.374					58.4102	52.6066	5.80362		5.80362
	57.2831	34.8099	177.759	1.0241	2.68725	29.5164	34.0497	20.0556	30.1836	553.645	451.78	0	225.492	1.7135	2.68601	605.014	443.68	0.9611	70.9294	0	118.406	189.581	294.892	251.386	98.2377	97.0281					65.0333	72.6256	7.59233		-7.59233
	57.2831	31.3289	177.759	1.0241	2.68725	29.5164	34.0497	20.0556	30.1836	553.645	451.78	0	225.492	1.7135	2.68601	605.014	443.68	0.9611	70.9294	0	118.406	191.956	304.734	239.833	102.226	92.8463					71.3566	64.7629	6.5937		6.5937
	57.2831	28.196	177.759	1.0241	2.68725	29.5164	34.0497	20.0556	30.1836	553.645	451.78	0	225.492	1.7135	2.68601	605.014	443.68	0.9611	70.9294	0	118.406	194.243	314.21	228.24	106.224	88.8469					89.6625	83.1039	6.55861		6.55861
	57.2831	25.3764	177.759	1.0241	2.68725	29.5164	34.0497	20.0556	30.1836	553.645	451.78	0	225.492	1.7135	2.68601	605.014	443.68	0.9611	70.9294	0	118.406	196.436	323.296	216.679	110.206	85.0444					105.947	95.4684	10.4788		10.4788
	57.2831	22.8388	177.759	1.0241	2.68725	29.5164	34.0497	20.0556	30.1836	553.645	451.78	0	225.492	1.7135	2.68601	605.014	443.68	0.9611	70.9294	0	118.406	198.53	331.97	205.219	114.15	81.4484					118.162	107.659	10.504		10.504
	57.2831	20.5549	177.759	1.0241	2.68725	29.5164	34.0497	20.0556	30.1836	553.645	451.78	0	225.492	1.7135	2.68601	605.014	443.68	0.9611	70.9294	0	118.406	200.521	340.219	193.926	118.035	78.0647					134.663	130.573	4.09003		4.09003
	57.2831	18.4994	177.759	1.0241	2.68725	29.5164	34.0497	20.0556	30.1836	553.645	451.78	0	225.492	1.7135	2.68601	605.014	443.68	0.9611	70.9294	0	118.406	202.407	348.035	182.863	121.839	74.8955					150.239	144.296	5.94268		5.94268
	57.2831	16.6495	177.759	1.0241	2.68725	29.5164	34.0497	20.0556	30.1836	553.645	451.78	0	225.492	1.7135	2.68601	605.014	443.68	0.9611	70.9294	0	118.406	204.188	355.414	172.085	125.544	71.9399					145.143	136.002	9.14125		9.14125
	57.2831	14.9845	177.759	1.0241	2.68725	29.5164	34.0497	20.0556	30.1836	553.645	451.78	0	225.492	1.7135	2.68601	605.014	443.68	0.9611	70.9294	0	118.406	205.863	362.356	161.642	129.133	69.1942					117.621	121.137	3.51587		-3.51587
	57.2831	13.4861	177.759	1.0241	2.68725	29.5164	34.0497	20.0556	30.1836	553.645	451.78	0	225.492	1.7135	2.68601	605.014	443.68	0.9611	70.9294	0	118.406	207.435	368.867	151.578	132.591	66.6526					71.3308	62.4517	8.87906		8.87906
	57.2831	12.1375	177.759	1.0241	2.68725	29.5164	34.0497	20.0556	30.1836	553.645	451.78	0	225.492	1.7135	2.68601	605.014	443.68	0.9611	70.9294	0	118.406	208.905	374.956	141.927	135.907	64.3075					51.8789	48.7695	3.10944		3.10944
	57.2831	10.9237	177.759	1.0241	2.68725	29.5164	34.0497	20.0556	30.1836	553.645	451.78	0	225.492	1.7135	2.68601	605.014	443.68	0.9611	70.9294	0	118.406	210.275	380.634	132.717	139.07	62.1501					33.4229	39.09	5.66717		-5.66717
	57.2831	9.83135	177.759	1.0241	2.68725	29.5164	34.0497	20.0556	30.1836	553.645	451.78	0	225.492	1.7135	2.68601	605.014	443.68	0.9611	70.9294	0	118.406	211.55	385.915	123.97	142.075	60.1708					9.50431	7.31064	2.19367		2.19367
	57.2831	8.84822	177.759	1.0241	2.68725	29.5164	34.0497	20.0556	30.1836	553.645	451.78	0	225.492	1.7135	2.68601	605.014	443.68	0.9611	70.9294	0	118.406	212.732	390.815	115.698	144.916	58.359					2.89156	-2.62811	5.51967		5.51967
	57.2831	7.9634	177.759	1.0241	2.68725	29.5164	34.0497	20.0556	30.1836	553.645	451.78	0	225.492	1.7135	2.68601	605.014	443.68	0.9611	70.9294	0	118.406	213.827	395.352	107.907	147.592	56.7044					1.04838	-0.18621	1.23459		1.23459
	57.2831	7.16706	177.759	1.0241	2.68725	29.5164	34.0497	20.0556	30.1836	553.645	451.78	0	225.492	1.7135	2.68601	605.014	443.68	0.9611	70.9294	0	118.406	214.839	399.543	100.599	150.102	55.196					0.65484	-1.92374	2.57858		2.57858
	57.2831	6.45035	177.759	1.0241	2.68725	29.5164	34.0497	20.0556	30.1836	553.645	451.78	0	225.492	1.7135	2.68601	605.014	443.68	0.9611	70.9294	0	118.406	215.772	403.407	93.7677	152.448	53.8234					0.30908	-0.8324	1.14148		1.14148
	57.2831	5.80532	177.759	1.0241	2.68725	29.5164	34.0497	20.0556	30.1836	553.645	451.78	0	225.492	1.7135	2.68601	605.014	443.68	0.9611	70.9294	0	118.406	216.63	406.965	87.4049	154.633	52.5762					0.201376	-0.42765	0.629026		0.629026
	57.2831	5.22478	177.759	1.0241	2.68725	29.5164	34.0497	20.0556	30.1836	553.645	451.78	0	225.492	1.7135	2.68601	605.014	443.68	0.9611	70.9294	0	118.406	217.419	410.234	81.497	156.661	51.4446					0.0719344	-0.17707	0.249004		0.249004
	57.2831	4.70231	177.759	1.0241	2.68725	29.5164	34.0497	20.0556	30.1836	553.645	451.78	0	225.492	1.7135	2.68601	605.014	443.68	0.9611	70.9294	0	118.406	218.143	413.234	76.0277	158.54	50.4191				800	85.6657	89.641	3.97523		-3.97523
	57.2831	4.23207	177.759	1.0241	2.68725	29.5164	34.0497	20.0556	30.1836	553.645	451.78	0	225.492	1.7135	2.68601	605.014	443.68	0.9611	70.9294	0	118.406	218.807	415.983	70.9782	160.273	49.4907					85.5672	89.2396	3.67248		-3.67248
	57.2831	3.80887	177.759	1.0241	2.68725	29.5164	34.0497	20.0556	30.1836	553.645	451.78	0	225.492	1.7135	2.68601	605.014	443.68	0.9611	70.9294	0	118.406	219.414	418.499	66.3281	161.87	48.6511					85.0486	86.29	1.24139		-1.24139
	57.2831	3.42798	177.759	1.0241	2.68725	29.5164	34.0497	20.0556	30.1836	553.645	451.78	0	225.492	1.7135	2.68601	605.014	443.68	0.9611	70.9294	0	118.406	219.969	420.799	62.0558	163.337	47.8924					83.8165	85.4167	1.60013		-1.60013
	57.2831	3.08518	177.759	1.0241	2.68725	29.5164	34.0497	20.0556	30.1836	553.645	451.78	0	225.492	1.7135	2.68601	605.014	443.68	0.9611	70.9294	0	118.406	220.476	422.899	58.139	164.682	47.2074					80.0058	78.211	1.79481		1.79481
	57.2831	2.77666	177.759	1.0241	2.68725	29.5164	34.0497	20.0556	30.1836	553.645	451.78	0	225.492	1.7135	2.68601	605.014	443.68	0.9611	70.9294	0	118.406	220.939	424.815	54.555	165.913	46.5892					75.556	78.7241	3.16804		-3.16804
	57.2831	2.499	177.759	1.0241	2.68725	29.5164	34.0497	20.0556	30.1836	553.645	451.78	0	225.492	1.7135	2.68601	605.014	443.68	0.9611	70.9294	0	118.406	221.36	426.562	51.2816	167.037	46.0318					71.9421	72.1694	0.227228		-0.227228
	57.2831	2.2491	177.759	1.0241	2.68725	29.5164	34.0497	20.0556	30.1836	553.645	451.78	0	225.492	1.7135	2.68601	605.014	443.68	0.9611	70.9294	0	118.406	221.744	428.153	48.2967	168.062	45.5294					63.4988	60.9728	2.52601		2.52601
	57.2831	2.02419	177.759	1.0241	2.68725	29.5164	34.0497	20.0556	30.1836	553.645	451.78	0	225.492	1.7135	2.68601	605.014	443.68	0.9611	70.9294	0	118.406	222.094	429.601	45.579	168.995	45.0768					57.1821	57.4736	0.291463		-0.291463
	57.2831	1.82177	177.759	1.0241	2.68725	29.5164	34.0497	20.0556	30.1836	553.645	451.78	0	225.492	1.7135	2.68601	605.014	443.68	0.9611	70.9294	0	118.406	222.411	430.917	43.1078	169.844	44.6692					52.6177	56.0716	3.45385		-3.45385
	57.2831	1.63959	177.759	1.0241	2.68725	29.5164	34.0497	20.0556	30.1836	553.645	451.78	0	225.492	1.7135	2.68601	605.014	443.68	0.9611	70.9294	0	118.406	222.7	432.115	40.8636	170.614	44.3024					46.1539	49.3125	3.15862		-3.15862
	57.2831	1.47563	177.759	1.0241	2.68725	29.5164	34.0497	20.0556	30.1836	553.645	451.78	0	225.492	1.7135	2.68601	605.014	443.68	0.9611	70.9294	0	118.406	222.963	433.202	38.8279	171.313	43.9722					38.9724	43.8746	4.90222		-4.90222
	57.2831	1.32807	177.759	1.0241	2.68725	29.5164	34.0497	20.0556	30.1836	553.645	451.78	0	225.492	1.7135	2.68601	605.014	443.68	0.9611	70.9294	0	118.406	223.201	434.189	36.9831	171.947	43.6753					18.8734	30.2777	11.4043		-11.4043
	57.2831	1.19526	177.759	1.0241	2.68725	29.5164	34.0497	20.0556	30.1836	553.645	451.78	0	225.492	1.7135	2.68601	605.014	443.68	0.9611	70.9294	0	118.406	223.417	435.086	35.3129	172.52	43.4082					14.9839	24.08	9.09608		-9.09608
	57.2831	1.07574	177.759	1.0241	2.68725	29.5164	34.0497	20.0556	30.1836	553.645	451.78	0	225.492	1.7135	2.68601	605.014	443.68	0.9611	70.9294	0	118.406	223.614	435.899	33.8021	173.039	43.168					10.9503	16.6094	5.65906		-5.65906
	57.2831	0.968163	177.759	1.0241	2.68725	29.5164	34.0497	20.0556	30.1836	553.645	451.78	0	225.492	1.7135	2.68601	605.014	443.68	0.9611	70.9294	0	118.406	223.792	436.636	32.4364	173.508	42.9522					9.4487	19.3098	9.8611		-9.8611
	57.2831	0.871347	177.759	1.0241	2.68725	29.5164	34.0497	20.0556	30.1836	553.645	451.78	0	225.492	1.7135	2.68601	605.014	443.68	0.9611	70.9294	0	118.406	223.953	437.305	31.2027	173.932	42.7582					7.88422	16.3114	8.42718		-8.42718
	57.2831	0.784212	177.759	1.0241	2.68725	29.5164	34.0497	20.0556	30.1836	553.645	451.78	0	225.492	1.7135	2.68601	605.014	443.68	0.9611	70.9294	0	118.406	224.099	437.911	30.0891	174.314	42.5838					4.7892	14.3146	9.52544		-9.52544
	57.2831	0.705791	177.759	1.0241	2.68725	29.5164	34.0497	20.0556	30.1836	553.645	451.78	0	225.492	1.7135	2.68601	605.014	443.68	0.9611	70.9294	0	118.406	224.232	438.46	29.0843	174.659	42.4272					2.74612	7.54598	4.79986		-4.79986
	57.2831	0.635212	177.759	1.0241	2.68725	29.5164	34.0497	20.0556	30.1836	553.645	451.78	0	225.492	1.7135	2.68601	605.014	443.68	0.9611	70.9294	0	118.406	224.352	438.957	28.1782	174.97	42.2865					1.43713	6.16331	4.72618		-4.72618
	57.2831	0.571691	177.759	1.0241	2.68725	29.5164	34.0497	20.0556	30.1836	553.645	451.78	0	225.492	1.7135	2.68601	605.014	443.68	0.9611	70.9294	0	118.406	224.46	439.408	27.3615	175.251	42.1601					0.978793	5.56565	4.58686		-4.58686
	57.2831	0.514522	177.759	1.0241	2.68725	29.5164	34.0497	20.0556	30.1836	553.645	451.78	0	225.492	1.7135	2.68601	605.014	443.68	0.9611	70.9294	0	118.406	224.559	439.815	26.6256	175.503	42.0466					0.482453	2.8286	2.34615		-2.34615
	57.2831	0.463069	177.759	1.0241	2.68725	29.5164	34.0497	20.0556	30.1836	553.645	451.78	0	225.492	1.7135	2.68601	605.014	443.68	0.9611	70.9294	0	118.406	224.648	440.185	25.9628	175.731	41.9446					0.313009	2.75334	2.44033		-2.44033
	57.2831	0.416762	177.759	1.0241	2.68725	29.5164	34.0497	20.0556	30.1836	553.645	451.78	0	225.492	1.7135	2.68601	605.014	443.68	0.9611	70.9294	0	118.406	224.729	440.519	25.366	175.936	41.8531					0.108046	1.39584	1.28779		-1.28779
	57.2831	0.375086	177.759	1.0241	2.68725	29.5164	34.0497	20.0556	30.1836	553.645	451.78	0	225.492	1.7135	2.68601	605.014	443.68	0.9611	70.9294	0	118.406	224.802	440.821	24.8289	176.12	41.7709				600	139.271	139.926	0.654983		-0.654983
	57.2831	0.337578	177.759	1.0241	2.68725	29.5164	34.0497	20.0556	30.1836	553.645	451.78	0	225.492	1.7135	2.68601	605.014	443.68	0.9611	70.9294	0	118.406	224.868	441.095	24.3455	176.286	41.6971					139.139	139.774	0.634655		-0.634655
	57.2831	0.30382	177.759	1.0241	2.68725	29.5164	34.0497	20.0556	30.1836	553.645	451.78	0	225.492	1.7135	2.68601	605.014	443.68	0.9611	70.9294	0	118.406	224.928	441.343	23.9106	176.436	41.6309					138.455	138.763	0.307882		-0.307882
	57.2831	0.273438	177.759	1.0241	2.68725	29.5164	34.0497	20.0556	30.1836	553.645	451.78	0	225.492	1.7135	2.68601	605.014	443.68	0.9611	70.9294	0	118.406	224.982	441.567	23.5195	176.57	41.5715					136.842	138.989	2.14799		-2.14799
	57.2831	0.246094	177.759	1.0241	2.68725	29.5164	34.0497	20.0556	30.1836	553.645	451.78	0	225.492	1.7135	2.68601	605.014	443.68	0.9611	70.9294	0	118.406	225.03	441.769	23.1678	176.691	41.5181					131.824	132.487	0.66291		-0.66291
	57.2831	0.221485	177.759	1.0241	2.68725	29.5164	34.0497	20.0556	30.1836	553.645	451.78	0	225.492	1.7135	2.68601	605.014	443.68	0.9611	70.9294	0	118.406	225.075	441.952	22.8515	176.799	41.4702					125.832	125.514	0.318545		0.318545
	57.2831	0.199336	177.759	1.0241	2.68725	29.5164	34.0497	20.0556	30.1836	553.645	451.78	0	225.492	1.7135	2.68601	605.014	443.68	0.9611	70.9294	0	118.406	225.115	442.118	22.5672	176.897	41.4272					120.817	119.717	1.09931		1.09931
	57.2831	0.179403	177.759	1.0241	2.68725	29.5164	34.0497	20.0556	30.1836	553.645	451.78	0	225.492	1.7135	2.68601	605.014	443.68	0.9611	70.9294	0	118.406	225.151	442.268	22.3117	176.985	41.3886					108.439	105.95	2.48899		2.48899
	57.2831	0.161462	177.759	1.0241	2.68725	29.5164	34.0497	20.0556	30.1836	553.645	451.78	0	225.492	1.7135	2.68601	605.014	443.68	0.9611	70.9294	0	118.406	225.184	442.404	22.082	177.063	41.354					98.5448	101.912	3.36712		-3.36712
	57.2831	0.145316	177.759	1.0241	2.68725	29.5164	34.0497	20.0556	30.1836	553.645	451.78	0	225.492	1.7135	2.68601	605.014	443.68	0.9611	70.9294	0	118.406	225.213	442.526	21.8756	177.134	41.3229					91.1294	92.3441	1.21469		-1.21469
	57.2831	0.130784	177.759	1.0241	2.68725	29.5164	34.0497	20.0556	30.1836	553.645	451.78	0	225.492	1.7135	2.68601	605.014	443.68	0.9611	70.9294	0	118.406	225.24	442.637	21.6902	177.198	41.295					80.4037	83.6182	3.21454		-3.21454
	57.2831	0.117706	177.759	1.0241	2.68725	29.5164	34.0497	20.0556	30.1836	553.645	451.78	0	225.492	1.7135	2.68601	605.014	443.68	0.9611	70.9294	0	118.406	225.264	442.737	21.5235	177.255	41.27					68.3496	71.0981	2.74851		-2.74851
																															33.9522	34.5461	0.593888		-0.593888
																															26.8301	30.9046	4.07448		-4.07448
																															19.0907	26.7055	7.61483		-7.61483
																															16.1758	14.5679	1.6079		1.6079
																															13.2017	16.5326	3.33091		-3.33091
																															7.70233	10.4121	2.70979		-2.70979
																															4.34348	7.41628	3.0728		-3.0728
																															2.26002	4.55062	2.2906		-2.2906
																															1.53757	4.62865	3.09108		-3.09108
																															0.757468	0.93133	0.173862		-0.173862
																															0.491447	1.3824	0.890953		-0.890953
																															0.169699	0.55071	0.381011		-0.381011
																														250	215.518	229.948	14.4301		-14.4301
																															215.41	229.926	14.5162		-14.5162
																															214.874	229.3	14.4258		-14.4258
																															213.653	229.605	15.9524		-15.9524
																															209.939	226.765	16.8264		-16.8264
																															205.498	229.132	23.6338		-23.6338
																															201.693	209.377	7.68372		-7.68372
																															191.522	189.702	1.82001		1.82001
																															182.1	198.132	16.0318		-16.0318
																															174.096	172.077	2.01924		2.01924
																															161.073	159.609	1.46417		1.46417
																															144.533	159.934	15.4003		-15.4003
																															83.5761	73.8063	9.76983		9.76983
																															65.8834	44.771	21.1124		21.1124
																															43.9922	55.5469	11.5547		-11.5547
																															35.5209	23.7717	11.7492		11.7492
																															27.23	43.9421	16.7121		-16.7121
																															13.9976	6.76522	7.23239		7.23239
																															7.45029	3.37416	4.07613		4.07613
																															3.79877	12.616	8.81728		-8.81728
																															2.57511	5.7544	3.17929		-3.17929
																															1.26676	1.72046	0.453695		-0.453695
																															0.822148	0.64979	0.172358		0.172358
																															0.284361	0.36552	0.0811594		-0.0811594
																														400	202.713	189.983	12.7303		12.7303
																															202.56	189.742	12.8178		12.8178
																															201.78	188.741	13.0388		13.0388
																															199.958	189.363	10.5954		10.5954
																															194.289	186.03	8.25894		8.25894
																															187.418	179.153	8.26443		8.26443
																															181.537	183.765	2.22784		-2.22784
																															166.373	153.394	12.9787		12.9787
																															153.517	145.848	7.66888		7.66888
																															143.487	131.998	11.4886		11.4886
																															128.497	122.906	5.59097		5.59097
																															111.119	90	21.1195		21.1195
																															58.1117	53.9055	4.20625		4.20625
																															45.8073	43.0928	2.7145		2.7145
																															31.703	33.7997	2.09668		-2.09668
																															26.3303	21.1111	5.21921		5.21921
																															20.9551	13.6965	7.25861		7.25861
																															11.6509	14.2072	2.55627		-2.55627
																															6.43484	6.70912	0.274281		-0.274281
																															3.32428	3.08442	0.239858		0.239858
																															2.2587	1.59985	0.658853		0.658853
																															1.11211	0.58681	0.5253		0.5253
																															0.721605	0.76632	0.0447148		-0.0447148
																															0.249308	0.26292	0.013612		-0.013612
																														background	26.8492	31.7827	4.9335		-4.9335
																															28.0631	32.8796	4.81645		-4.81645
																															32.3233	41.4834	9.16017		-9.16017
																															38.2839	51.578	13.2941		-13.2941
																															44.0216	47.0486	3.02699		-3.02699
																															61.0115	72.6319	11.6204		-11.6204
																															76.7734	80.9886	4.21523		-4.21523
																															89.1343	94.2211	5.08683		-5.08683
																															106.832	129.673	22.8405		-22.8405
																															125.199	132.204	7.00503		-7.00503
																															134.854	130.461	4.3925		4.3925
																															110.486	110.824	0.337191		-0.337191
																															66.7543	62.5853	4.169		4.169
																															47.999	46.1547	1.84427		1.84427
																															30.1492	37.4416	7.29244		-7.29244
																															7.336	6.68278	0.653224		0.653224
																															1.56395	1.35775	0.2062		0.2062
																															0.330344	-0.96164	1.29198		1.29198
																															0.161573	-2.16338	2.32495		2.32495
																															0.0642962	-0.92603	0.990326		0.990326
																															0.0423468	-0.47417	0.516517		0.516517
																															0.017035	-0.19453	0.211565		0.211565

[truncated: 12 more sheets: Background, Sheet4, ms800, ms600, ms400, ms250, ms155, ms92, ms61, ms25 , ms15, Sheet4 (2)]
